# Supplementary material
Source: PubMed Central journal article supplement (PMC7557154)

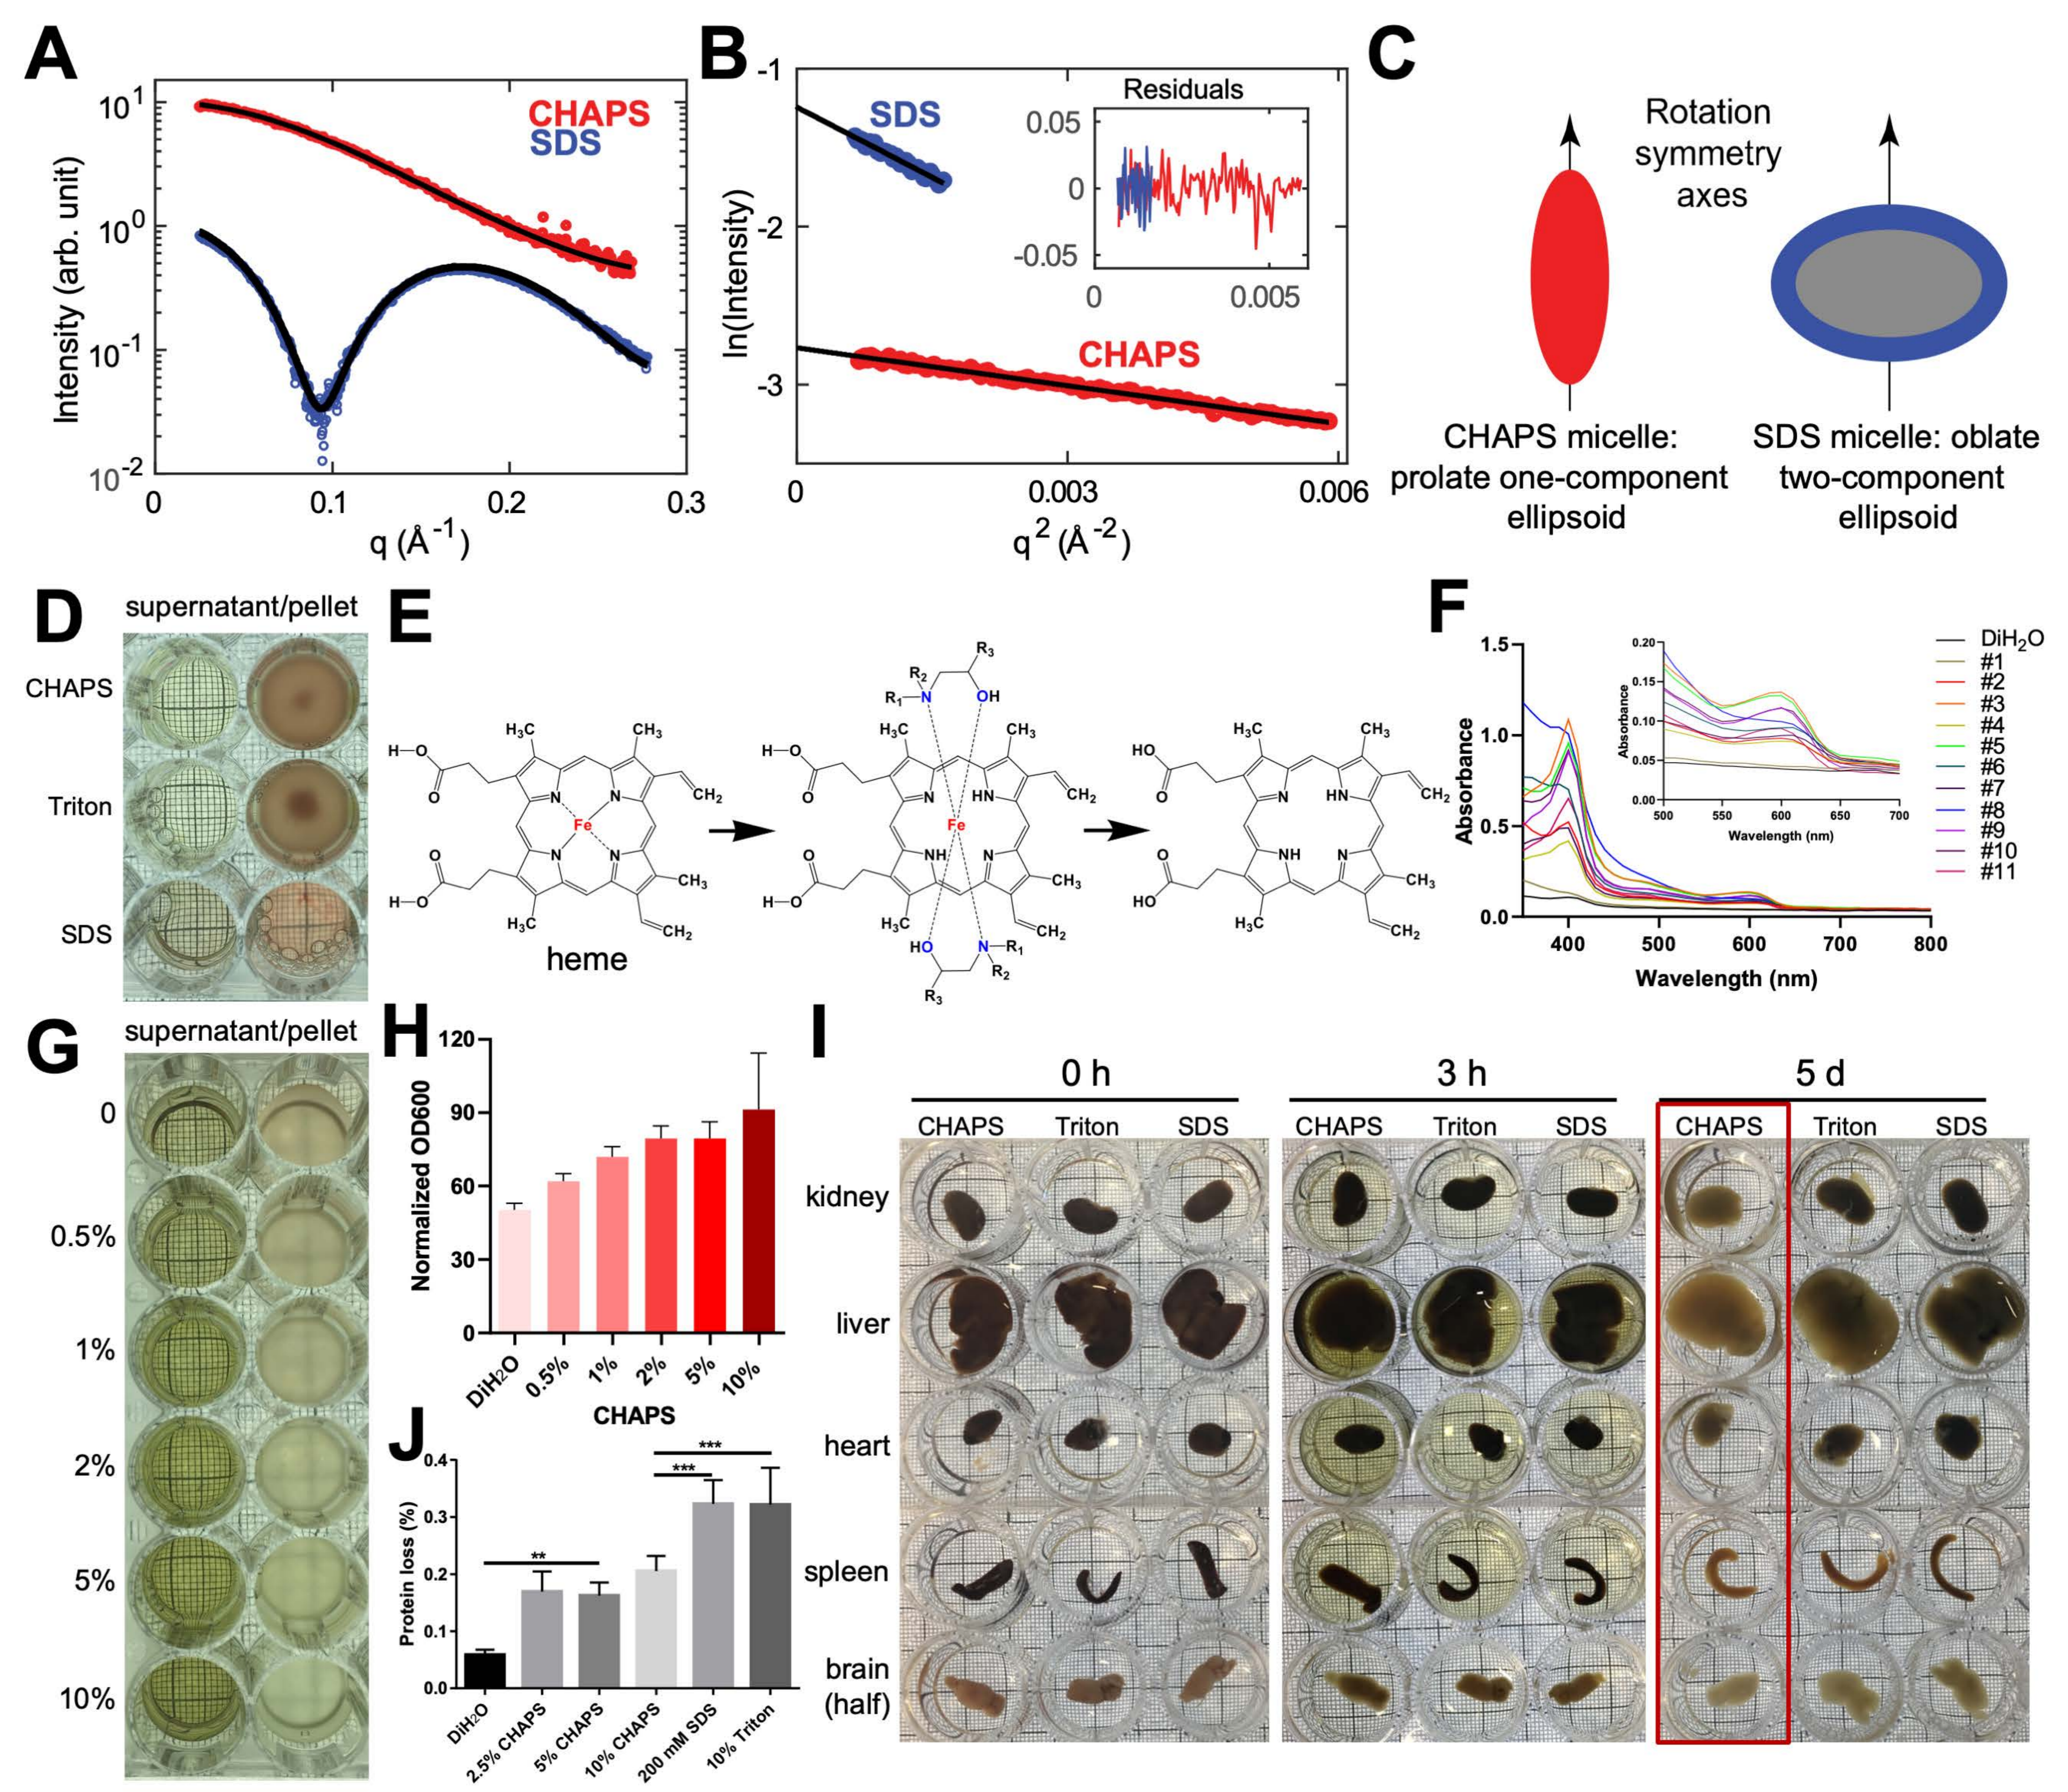

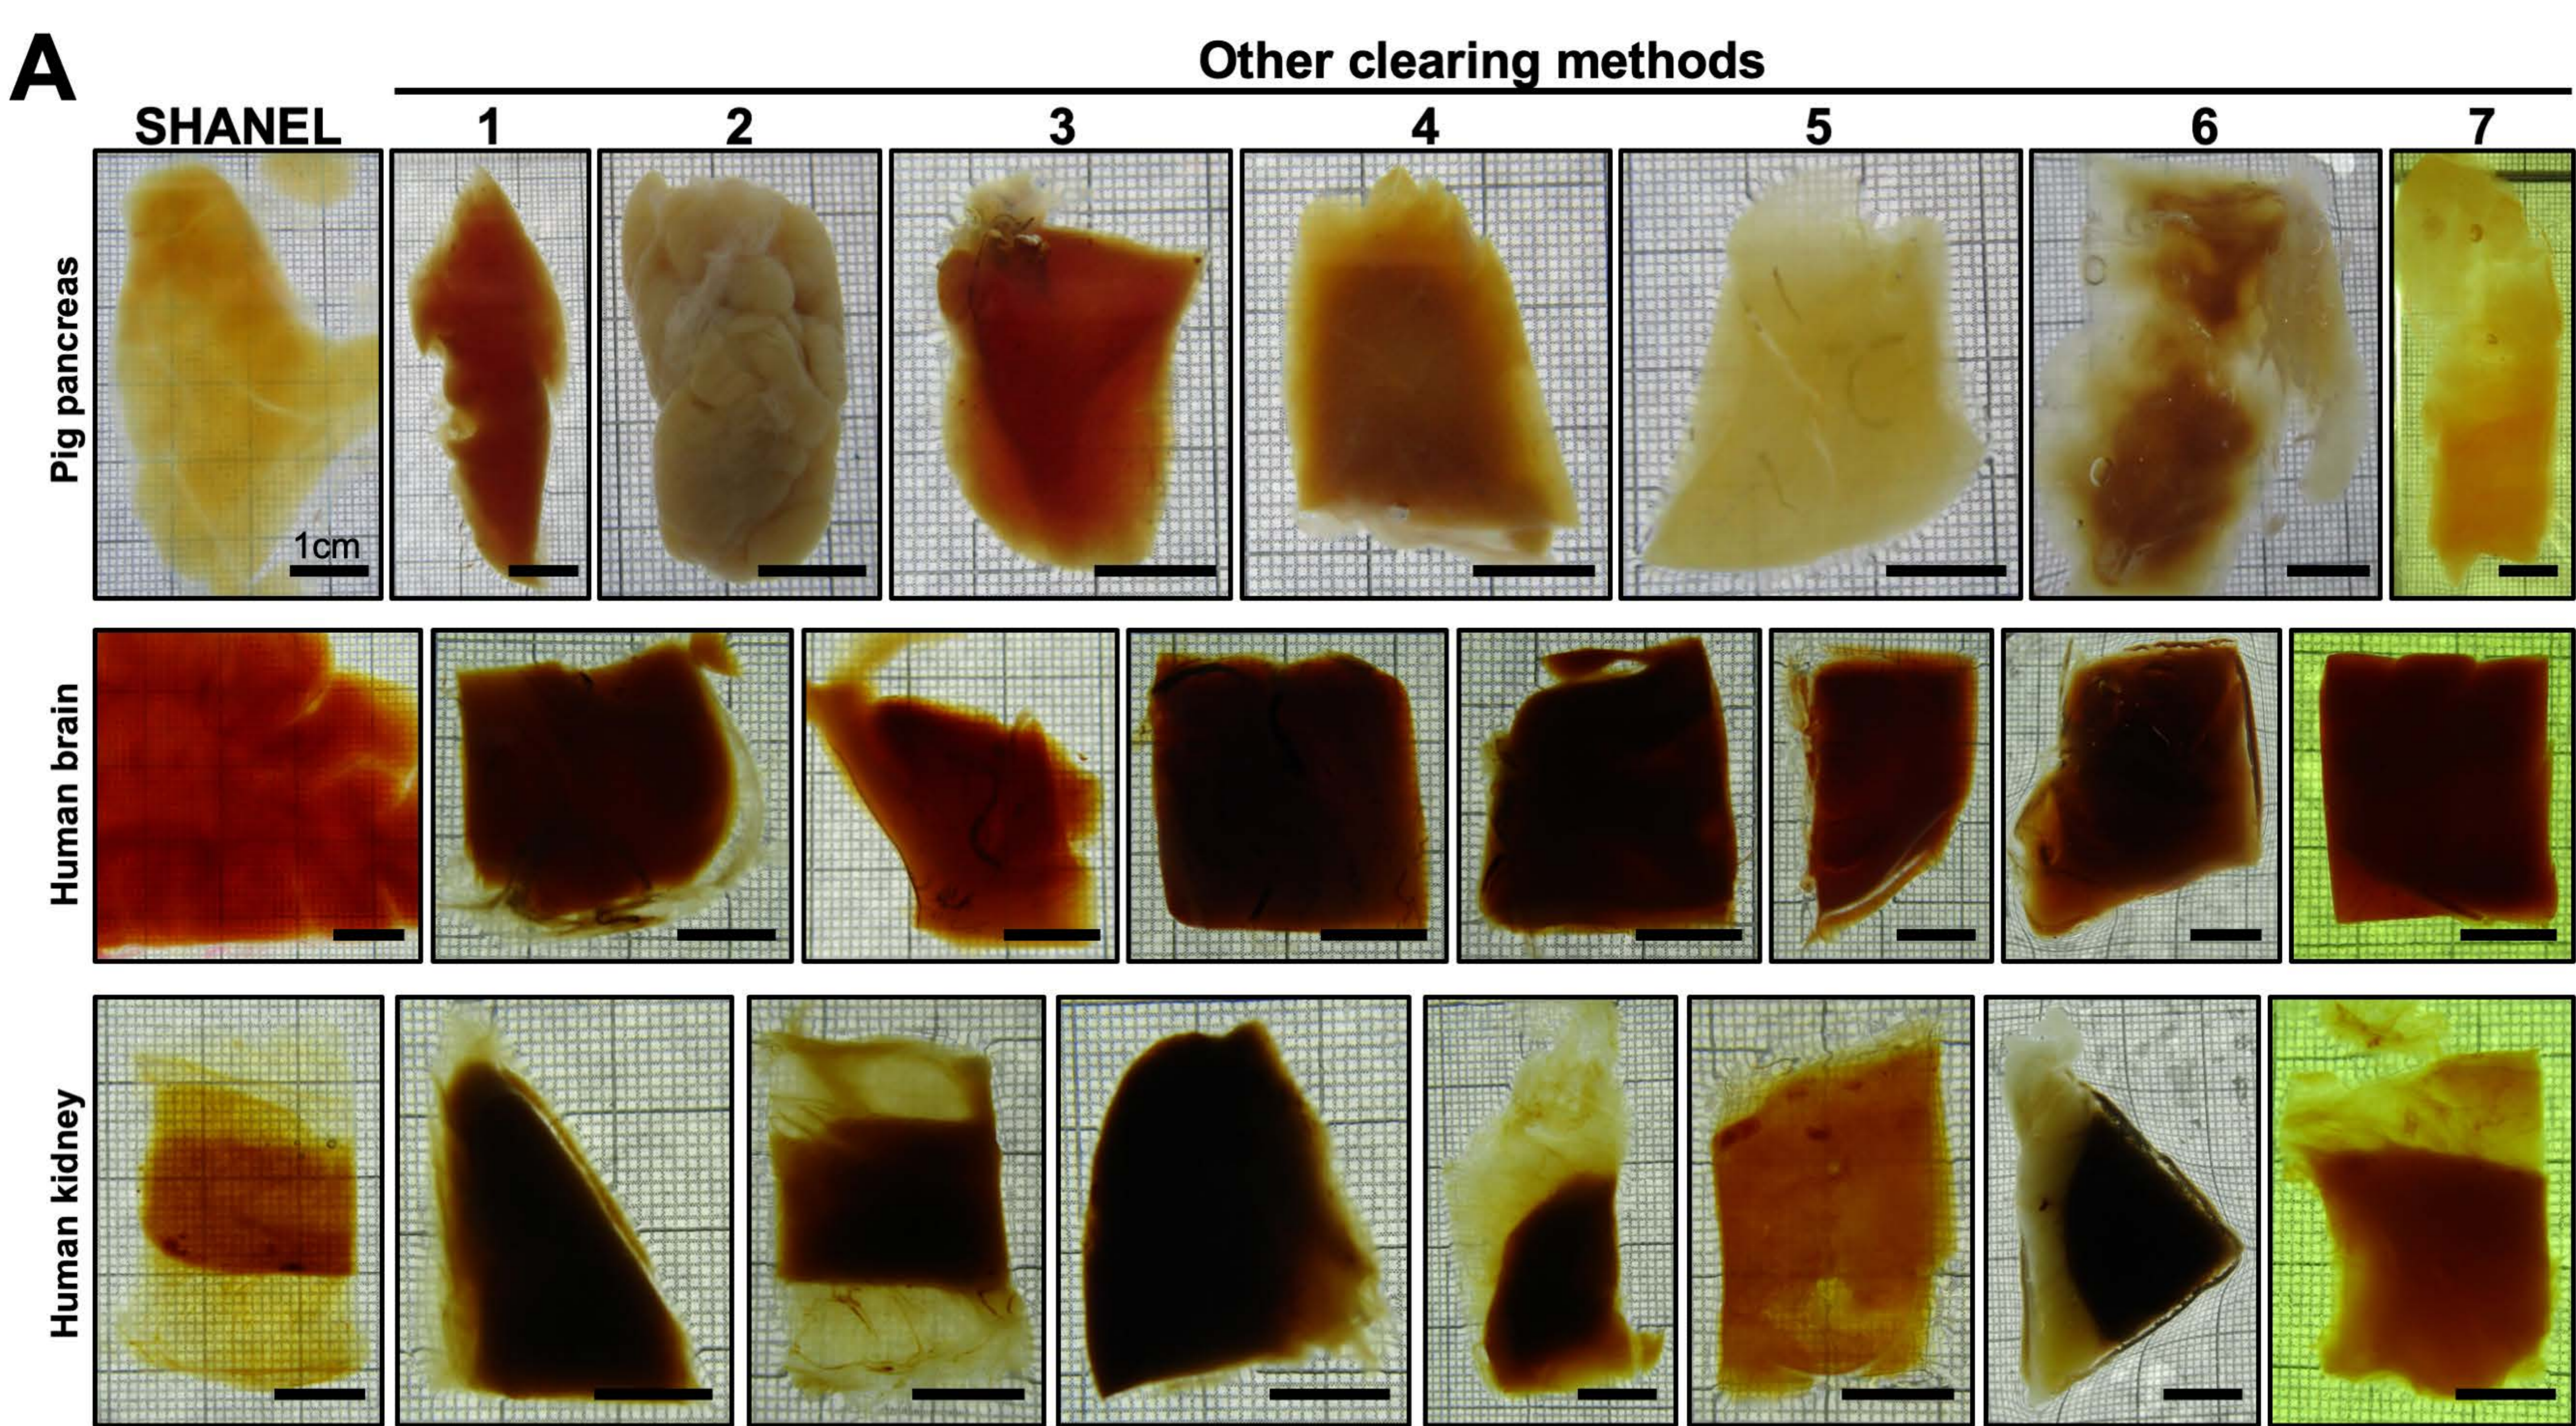

SHANEL (1.5 months of clearing)

iDISCO+ (2 months of clearing)

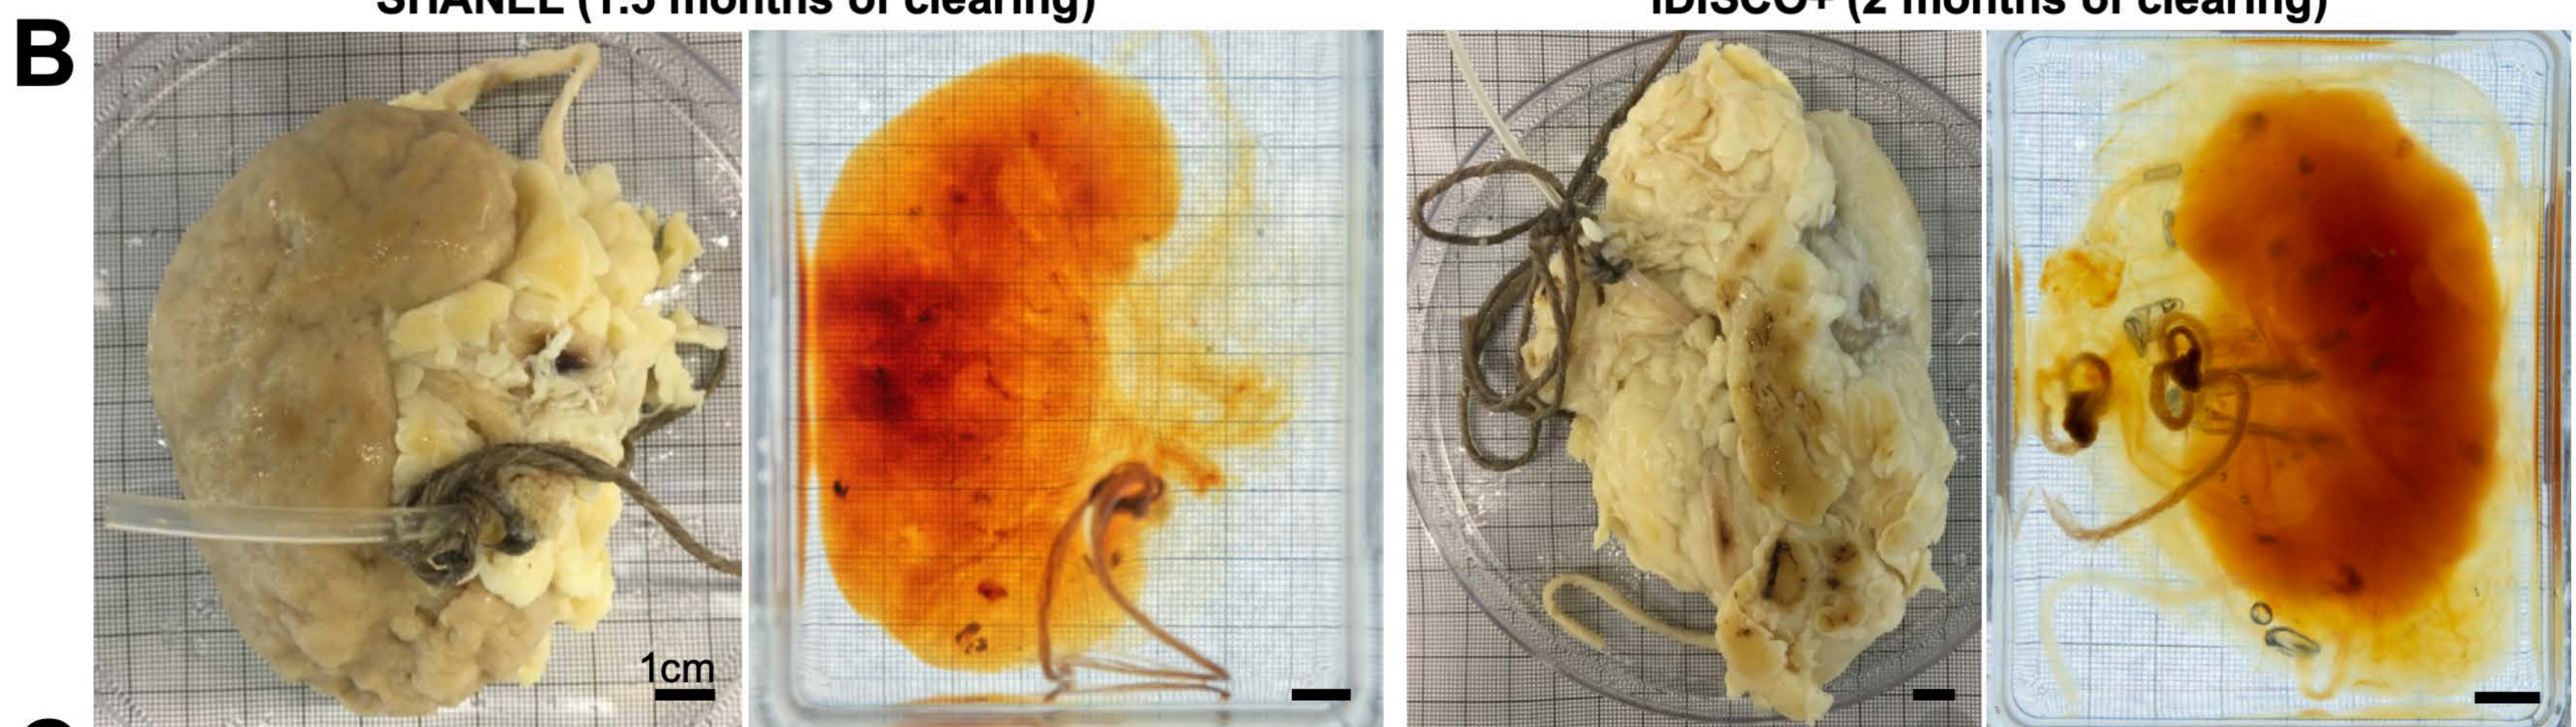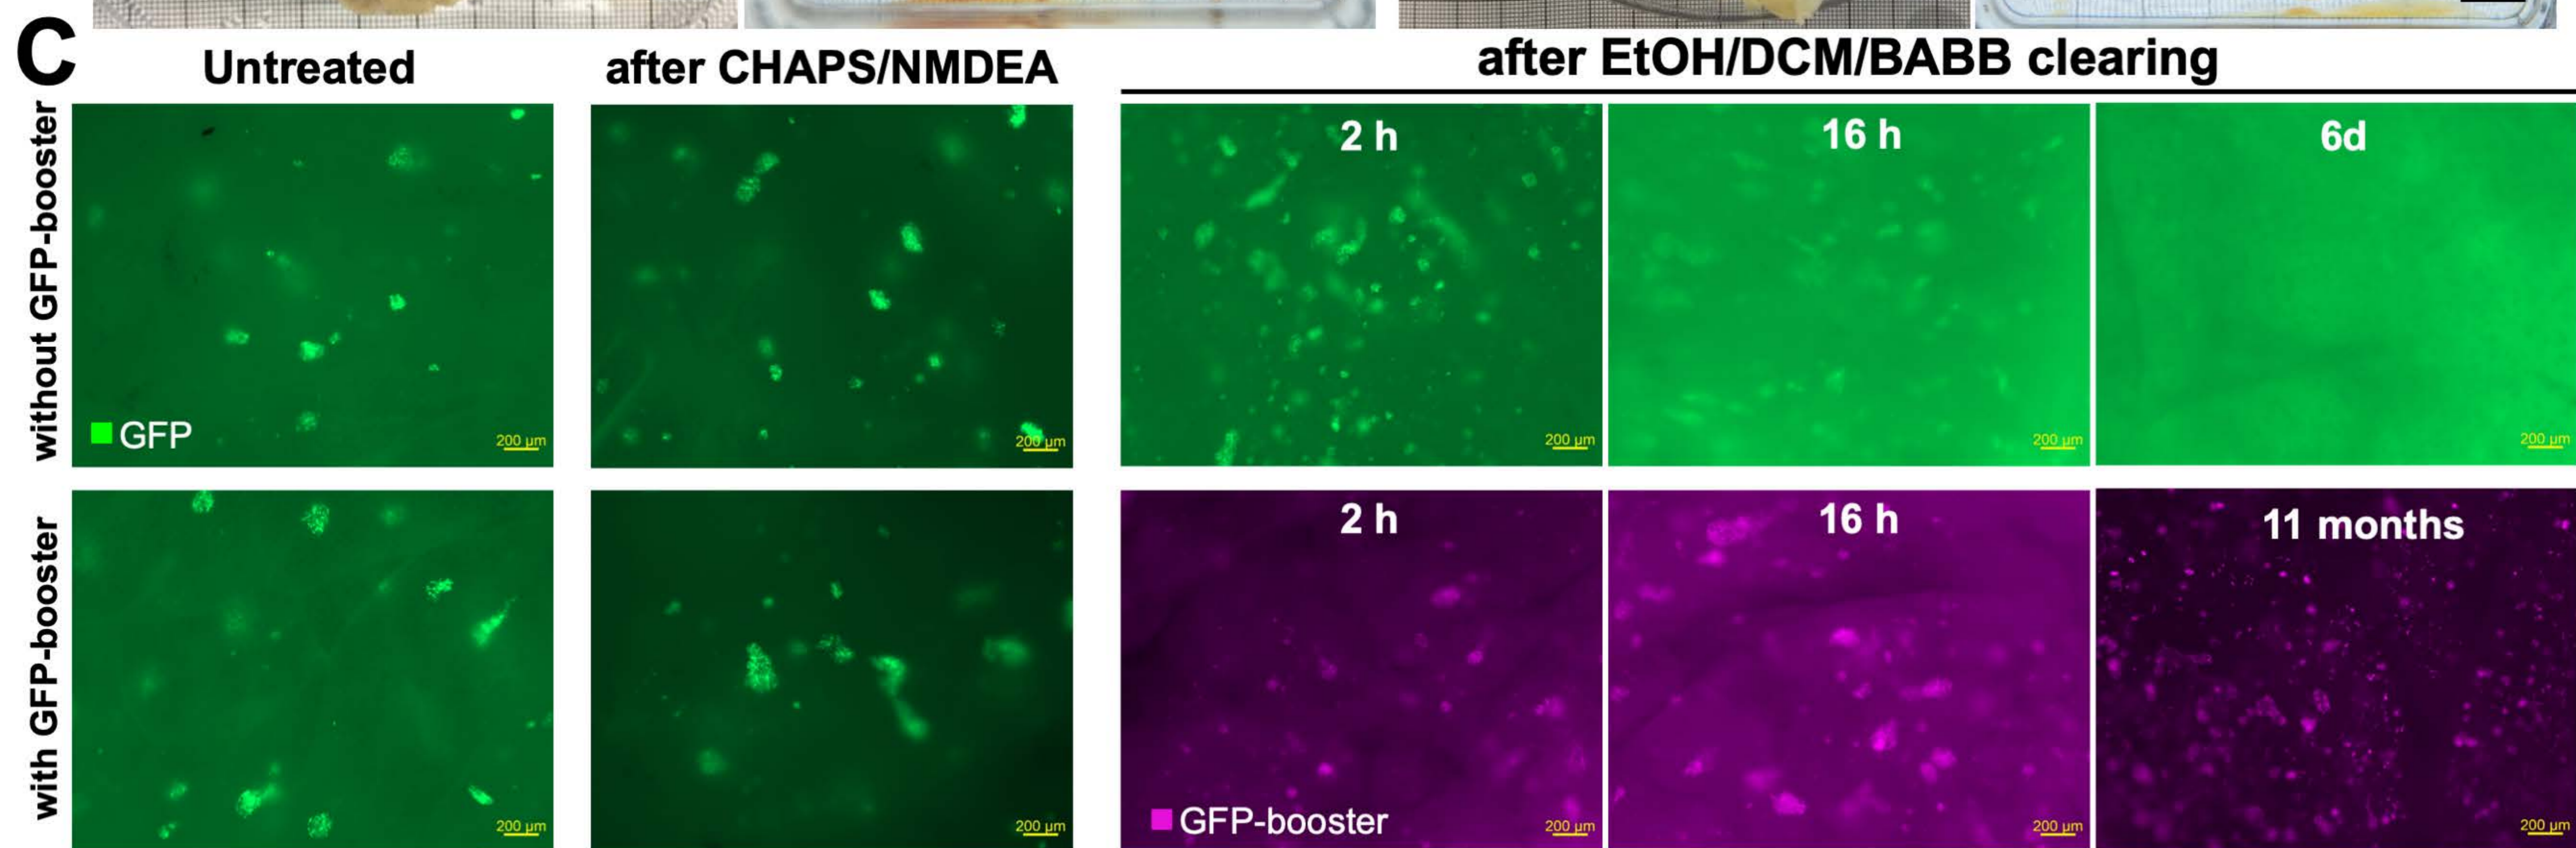

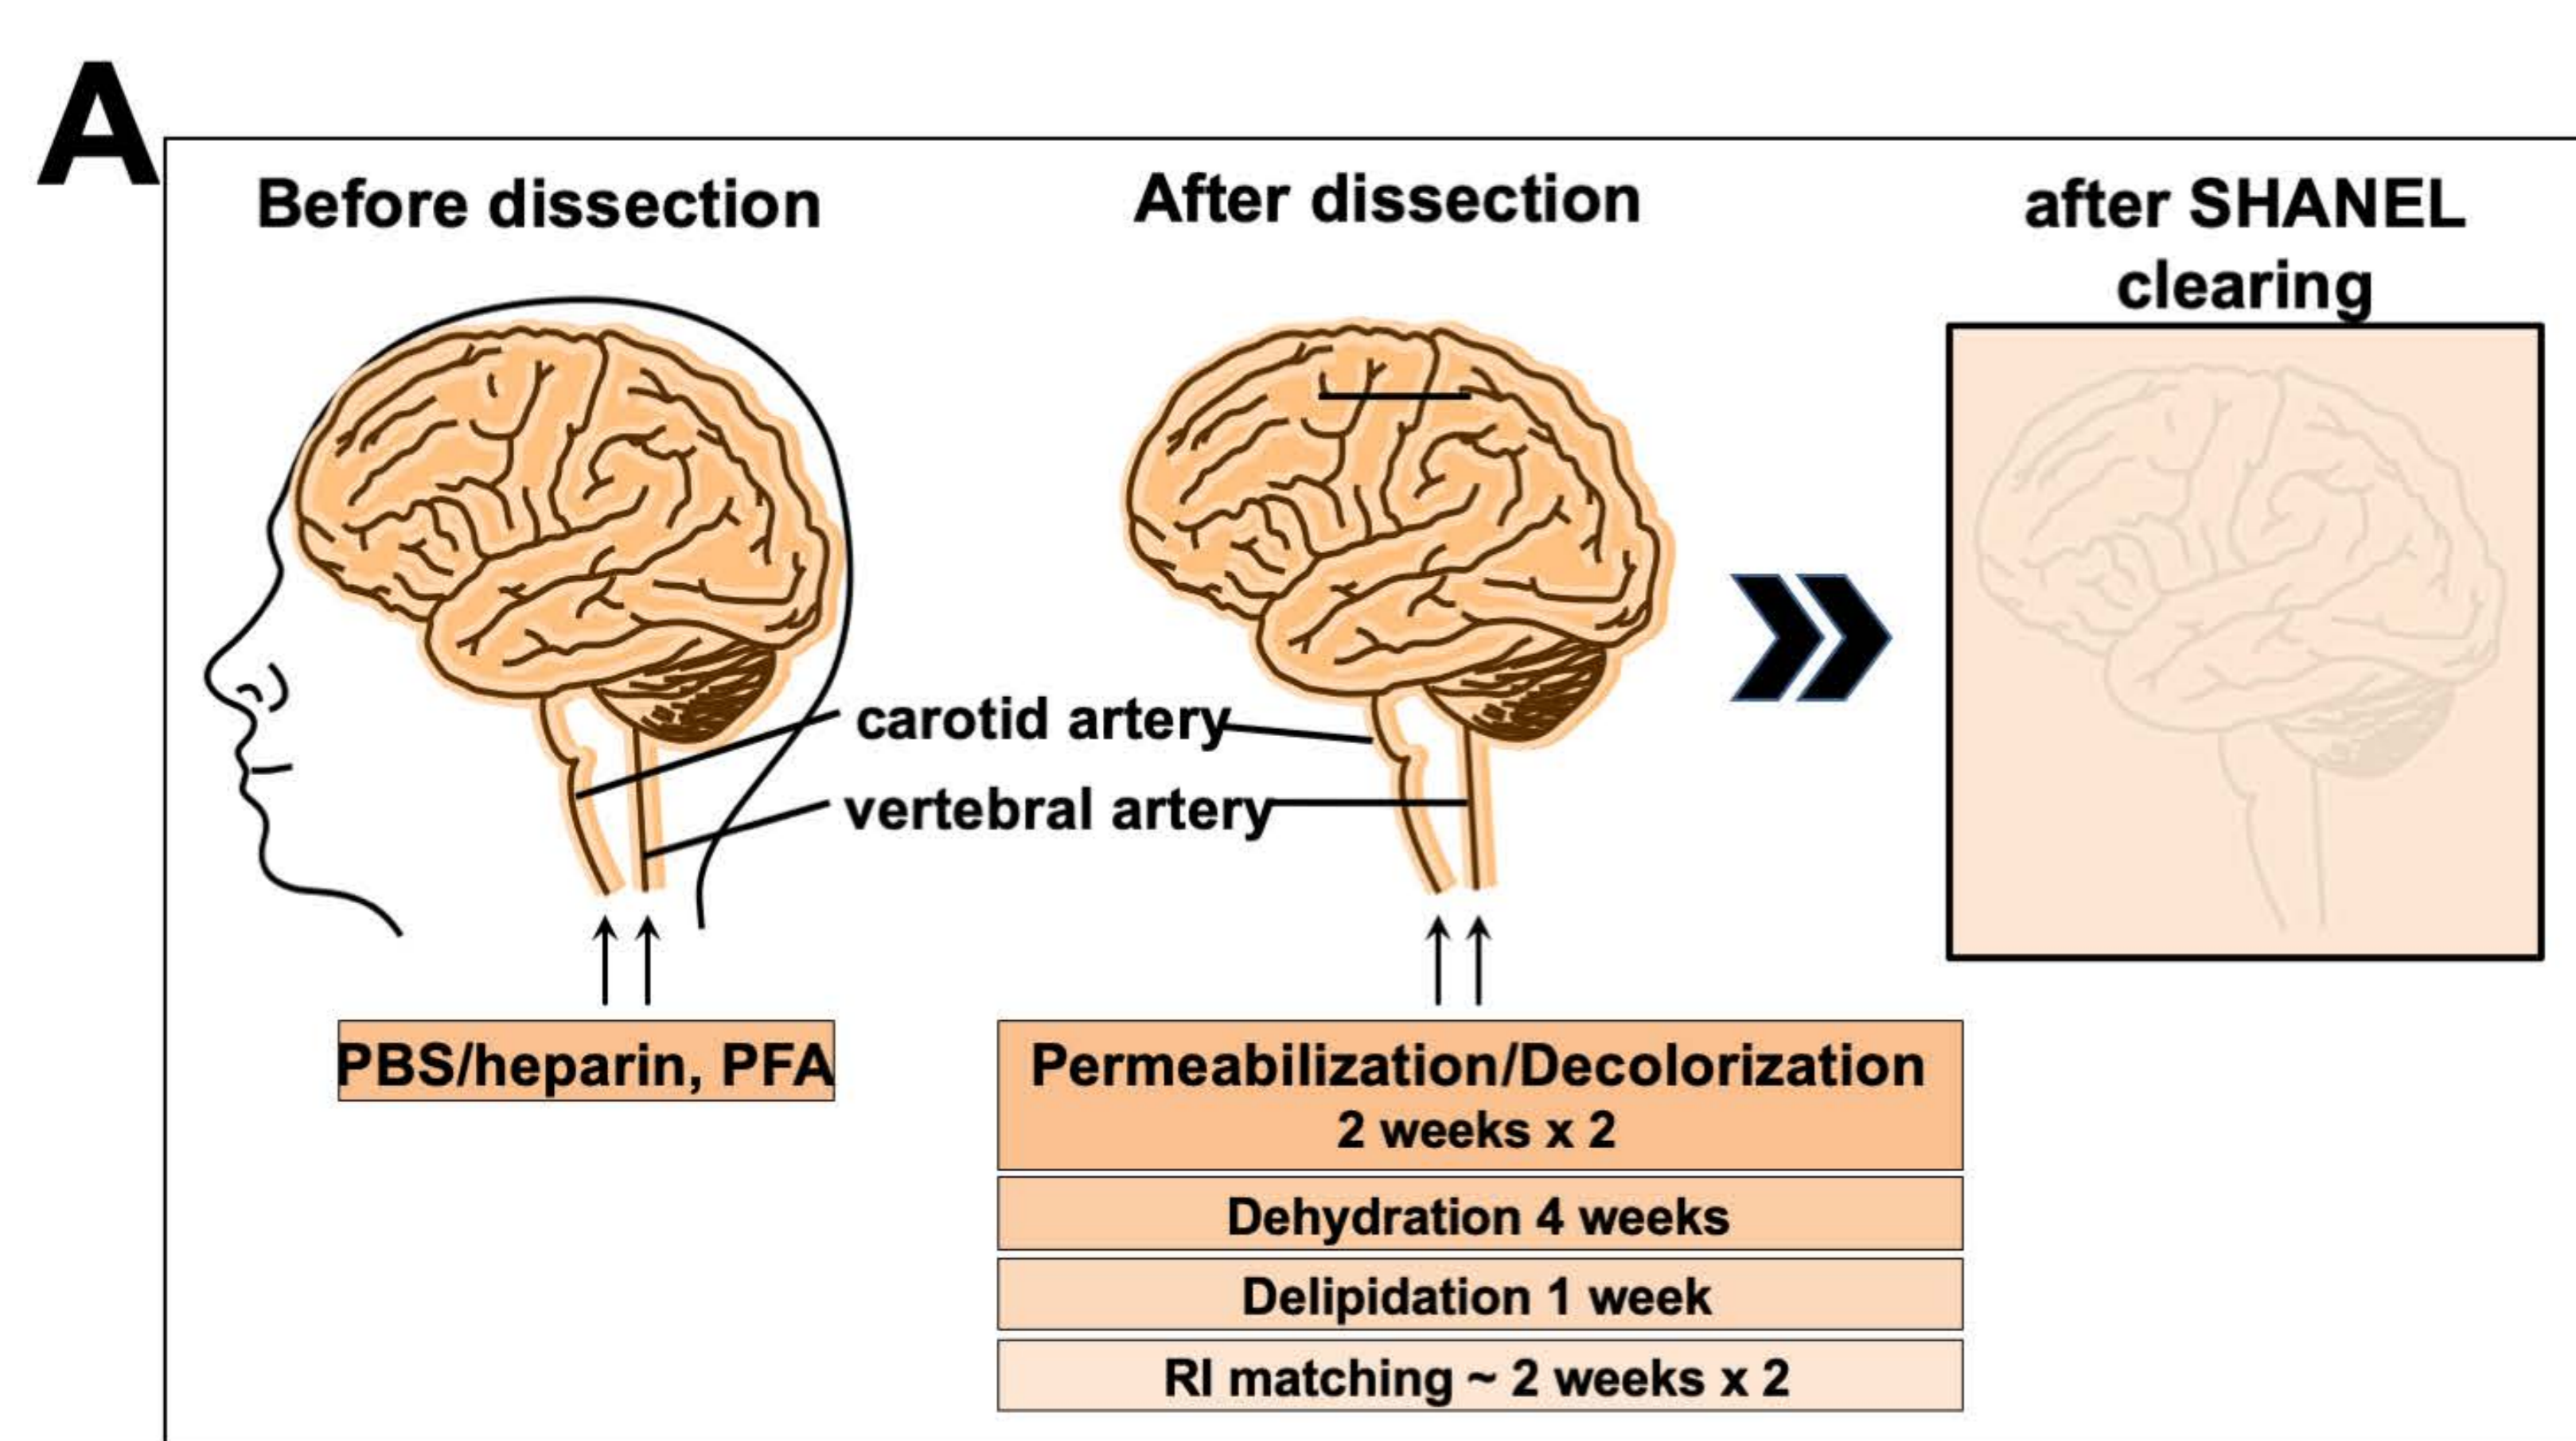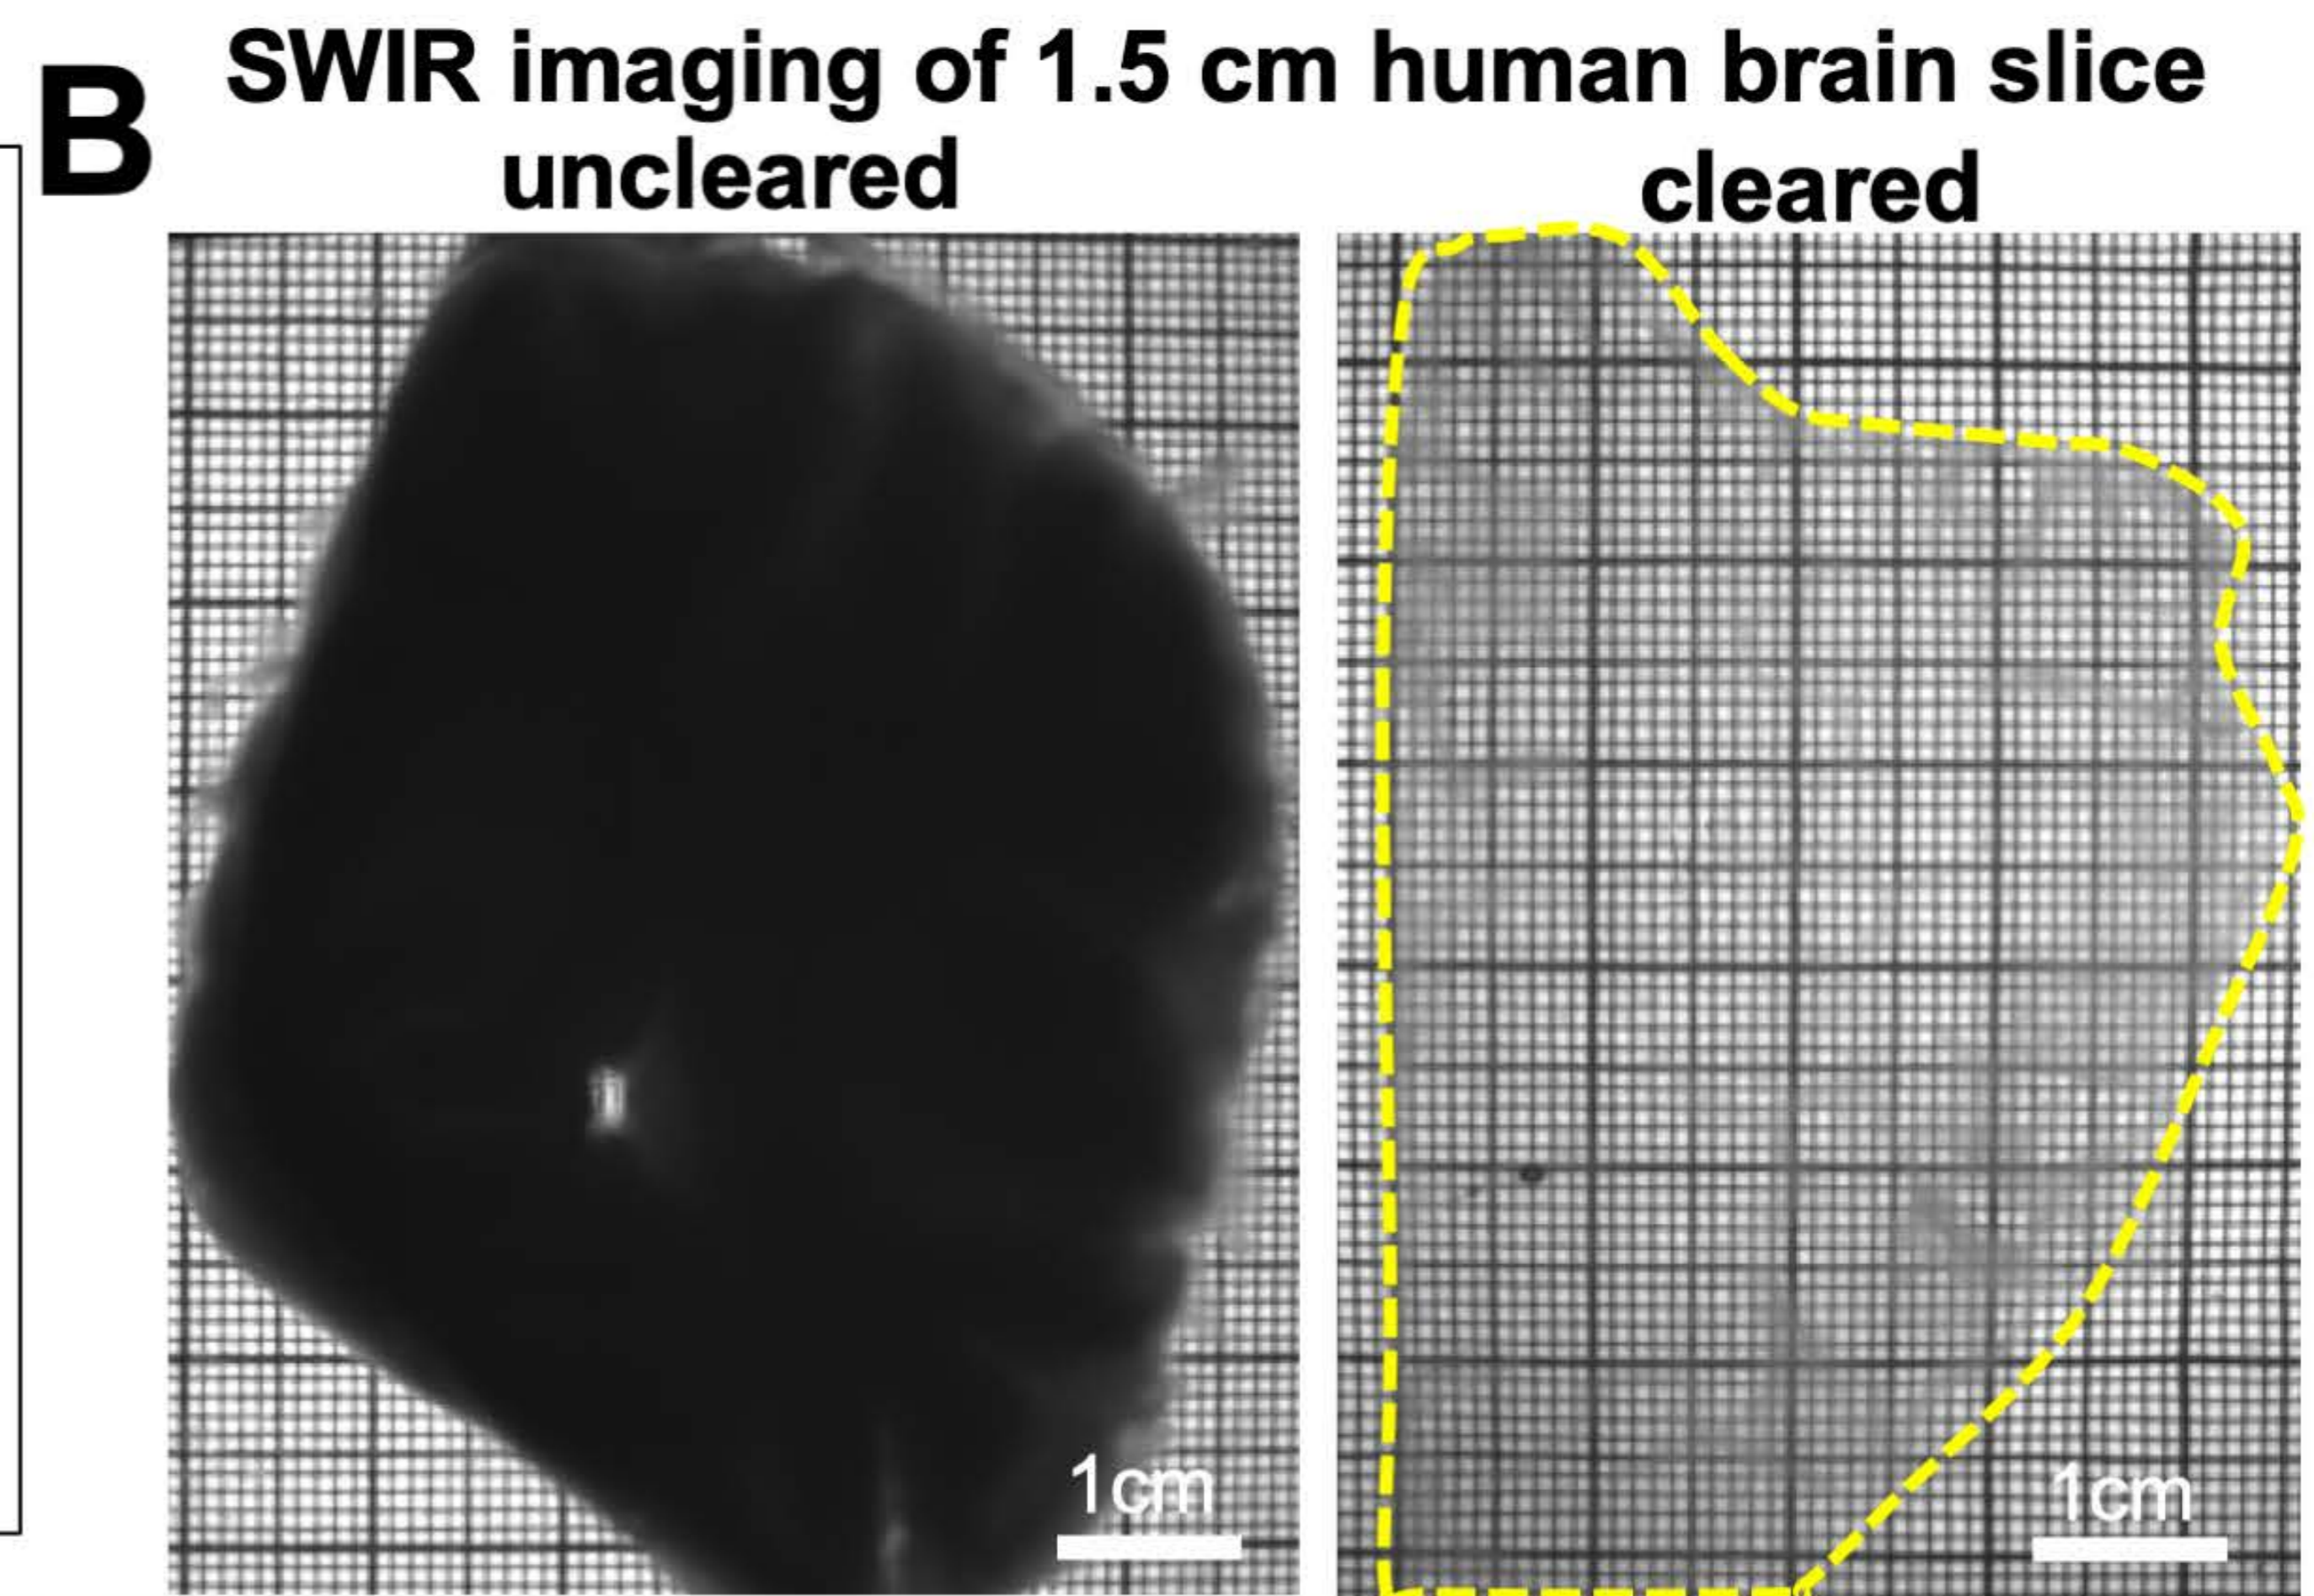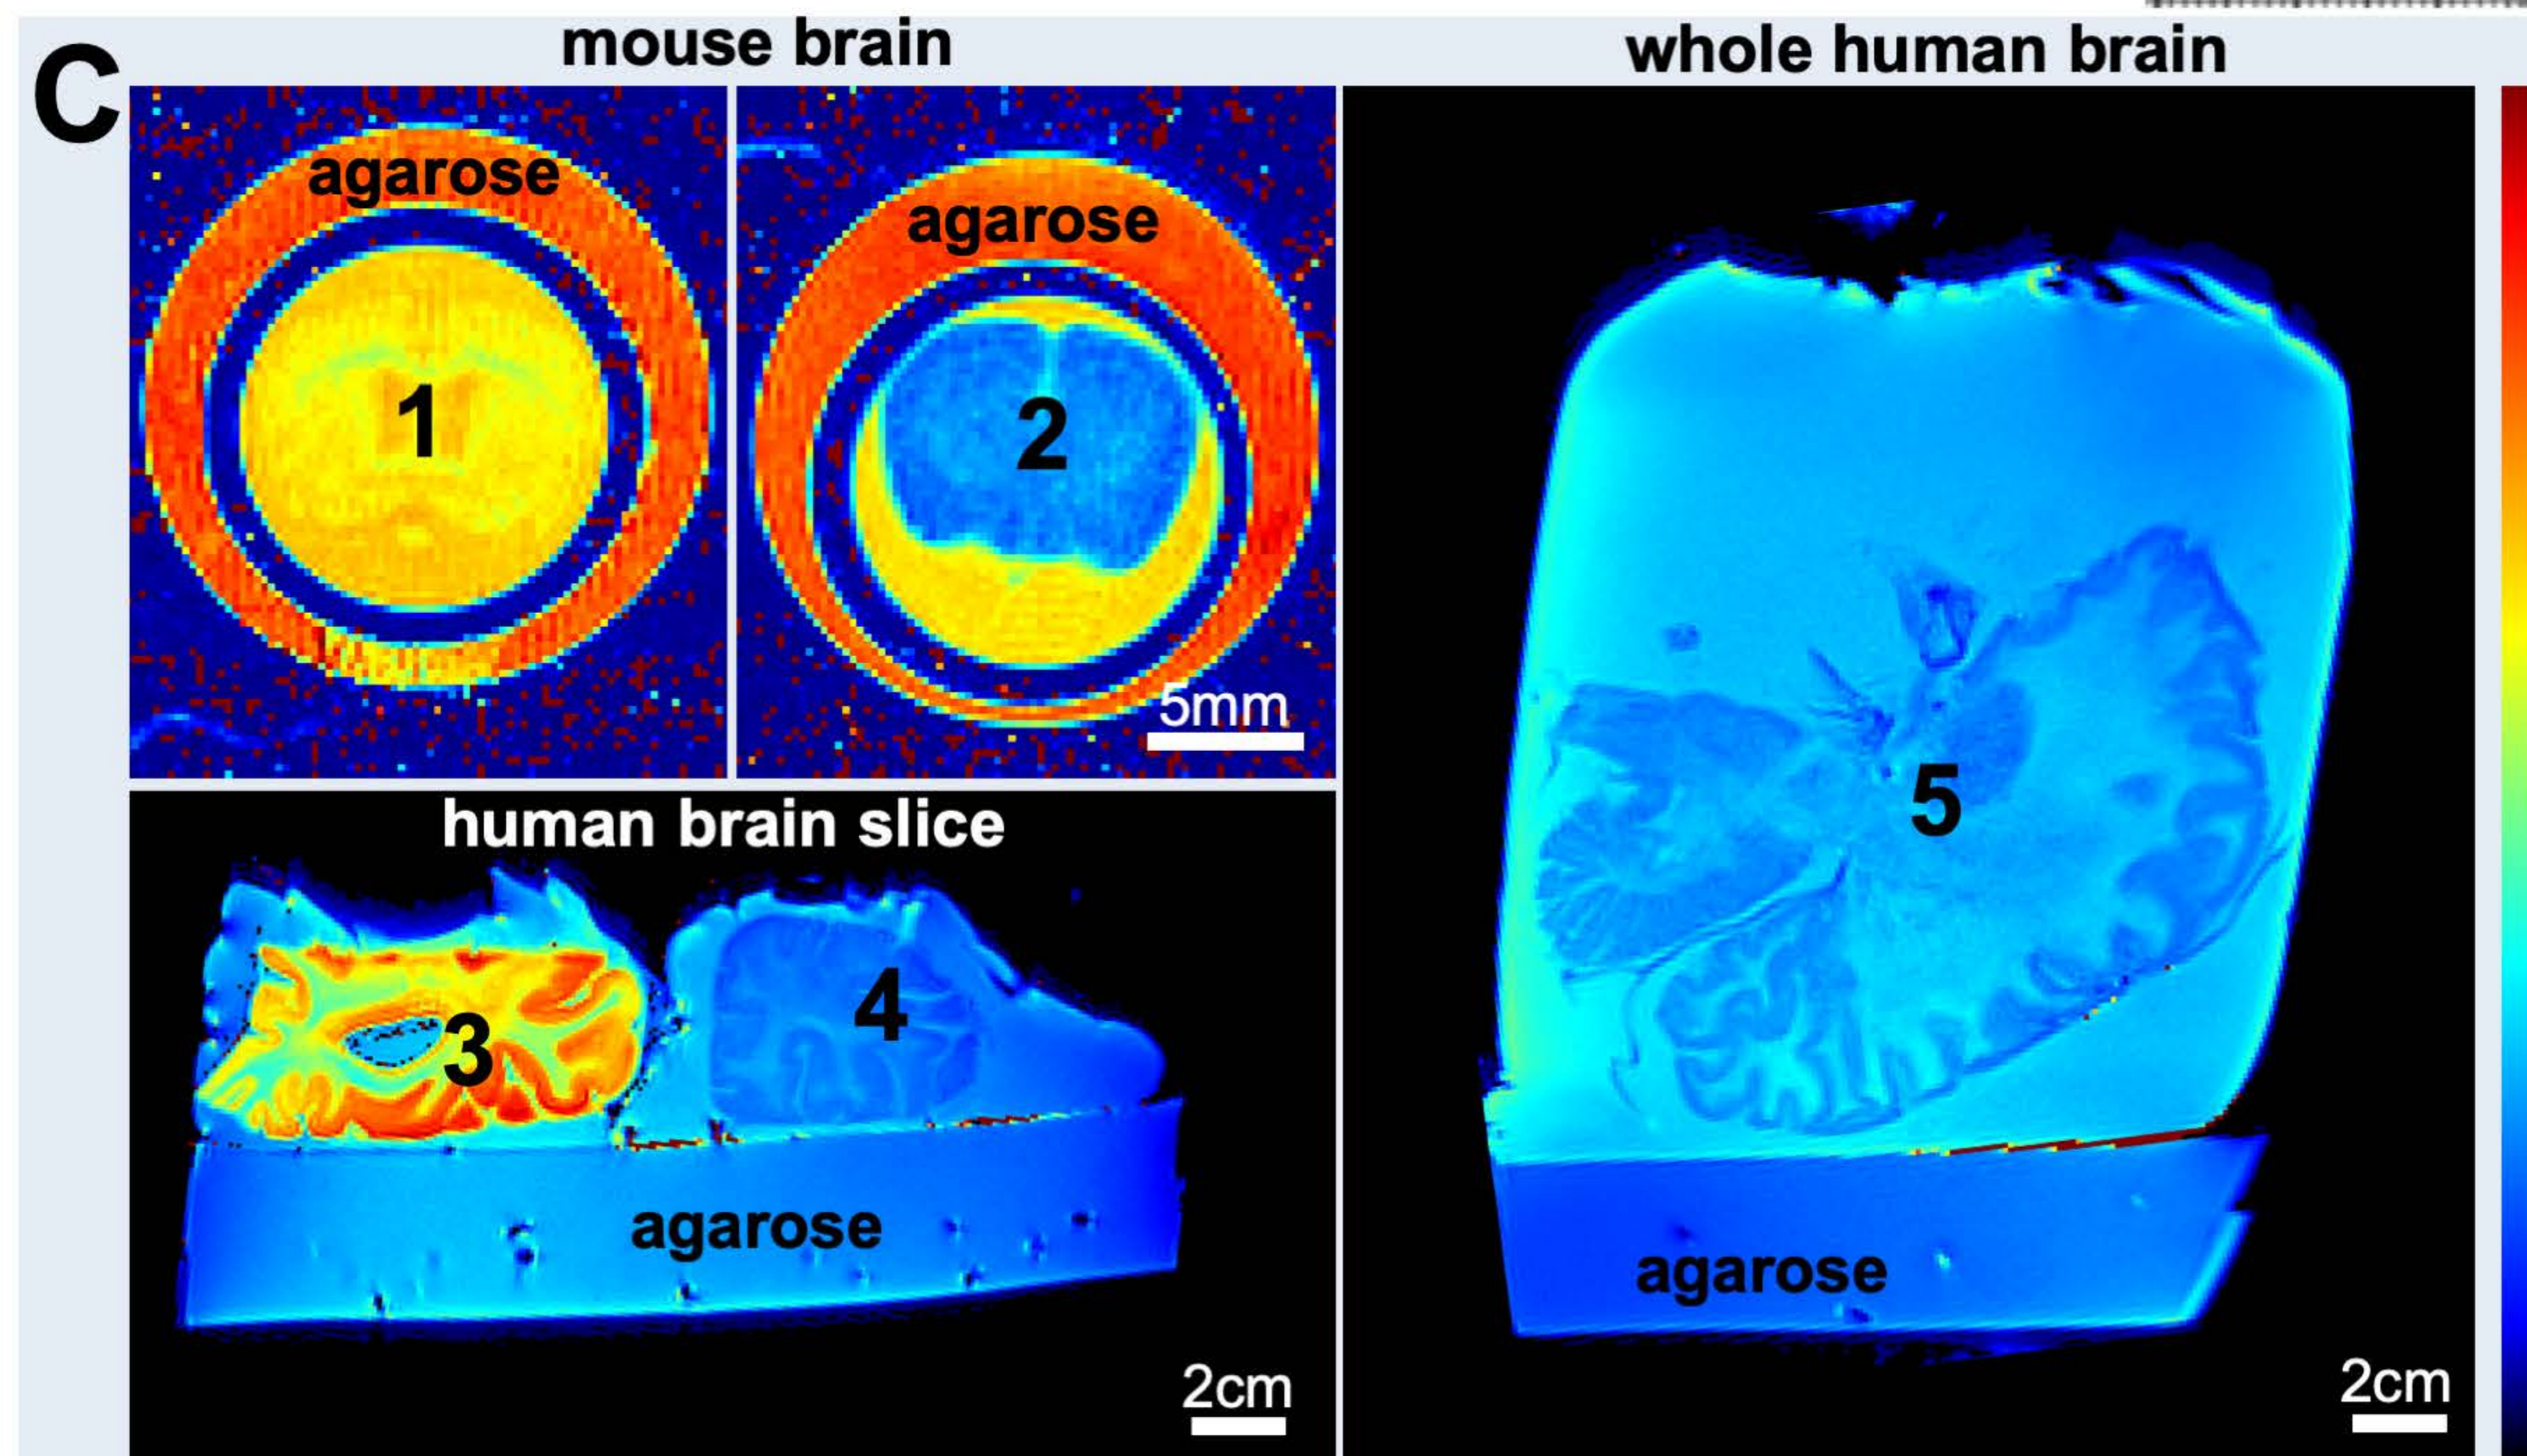

| No. | Organs                      | Normalized Proton Density |
|-----|-----------------------------|---------------------------|
| 1   | uncleared mouse brain       | 0.700                     |
| 2   | cleared mouse brain         | 0.290                     |
| 3   | uncleared human brain slice | 2.258                     |
| 4   | cleared human brain slice   | 1.229                     |
| 5   | cleared whole human brain   | 1.461                     |

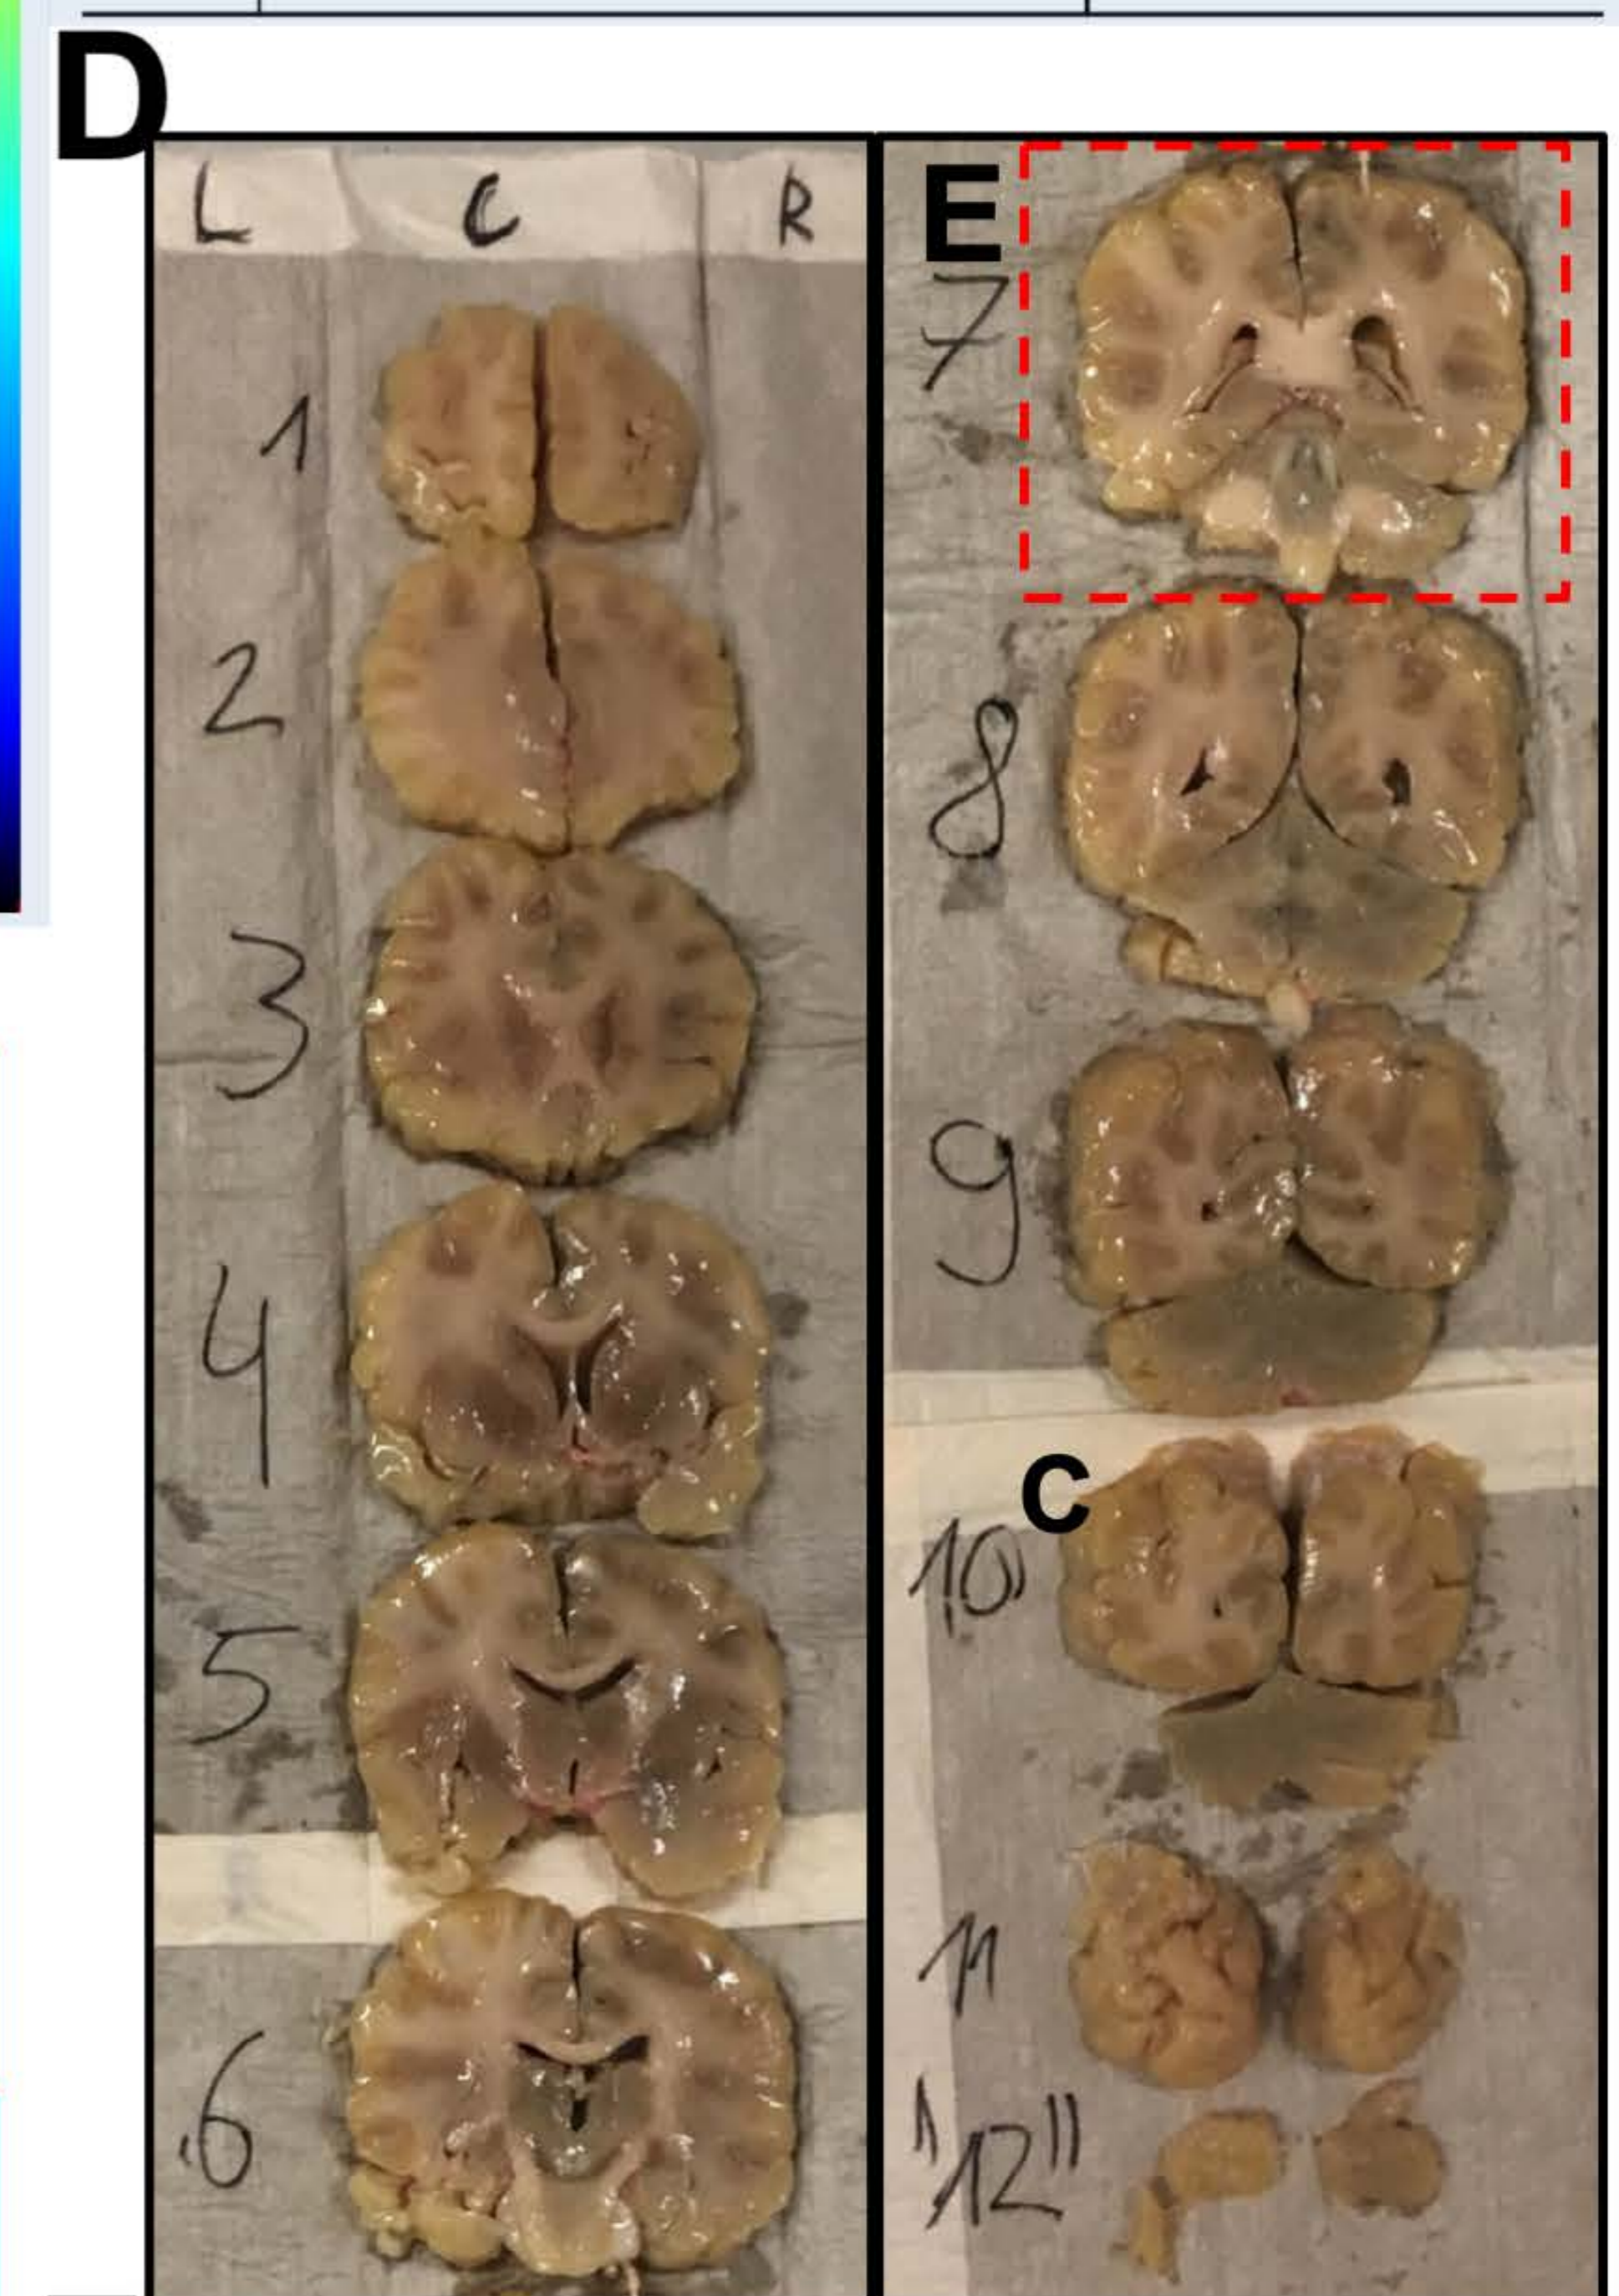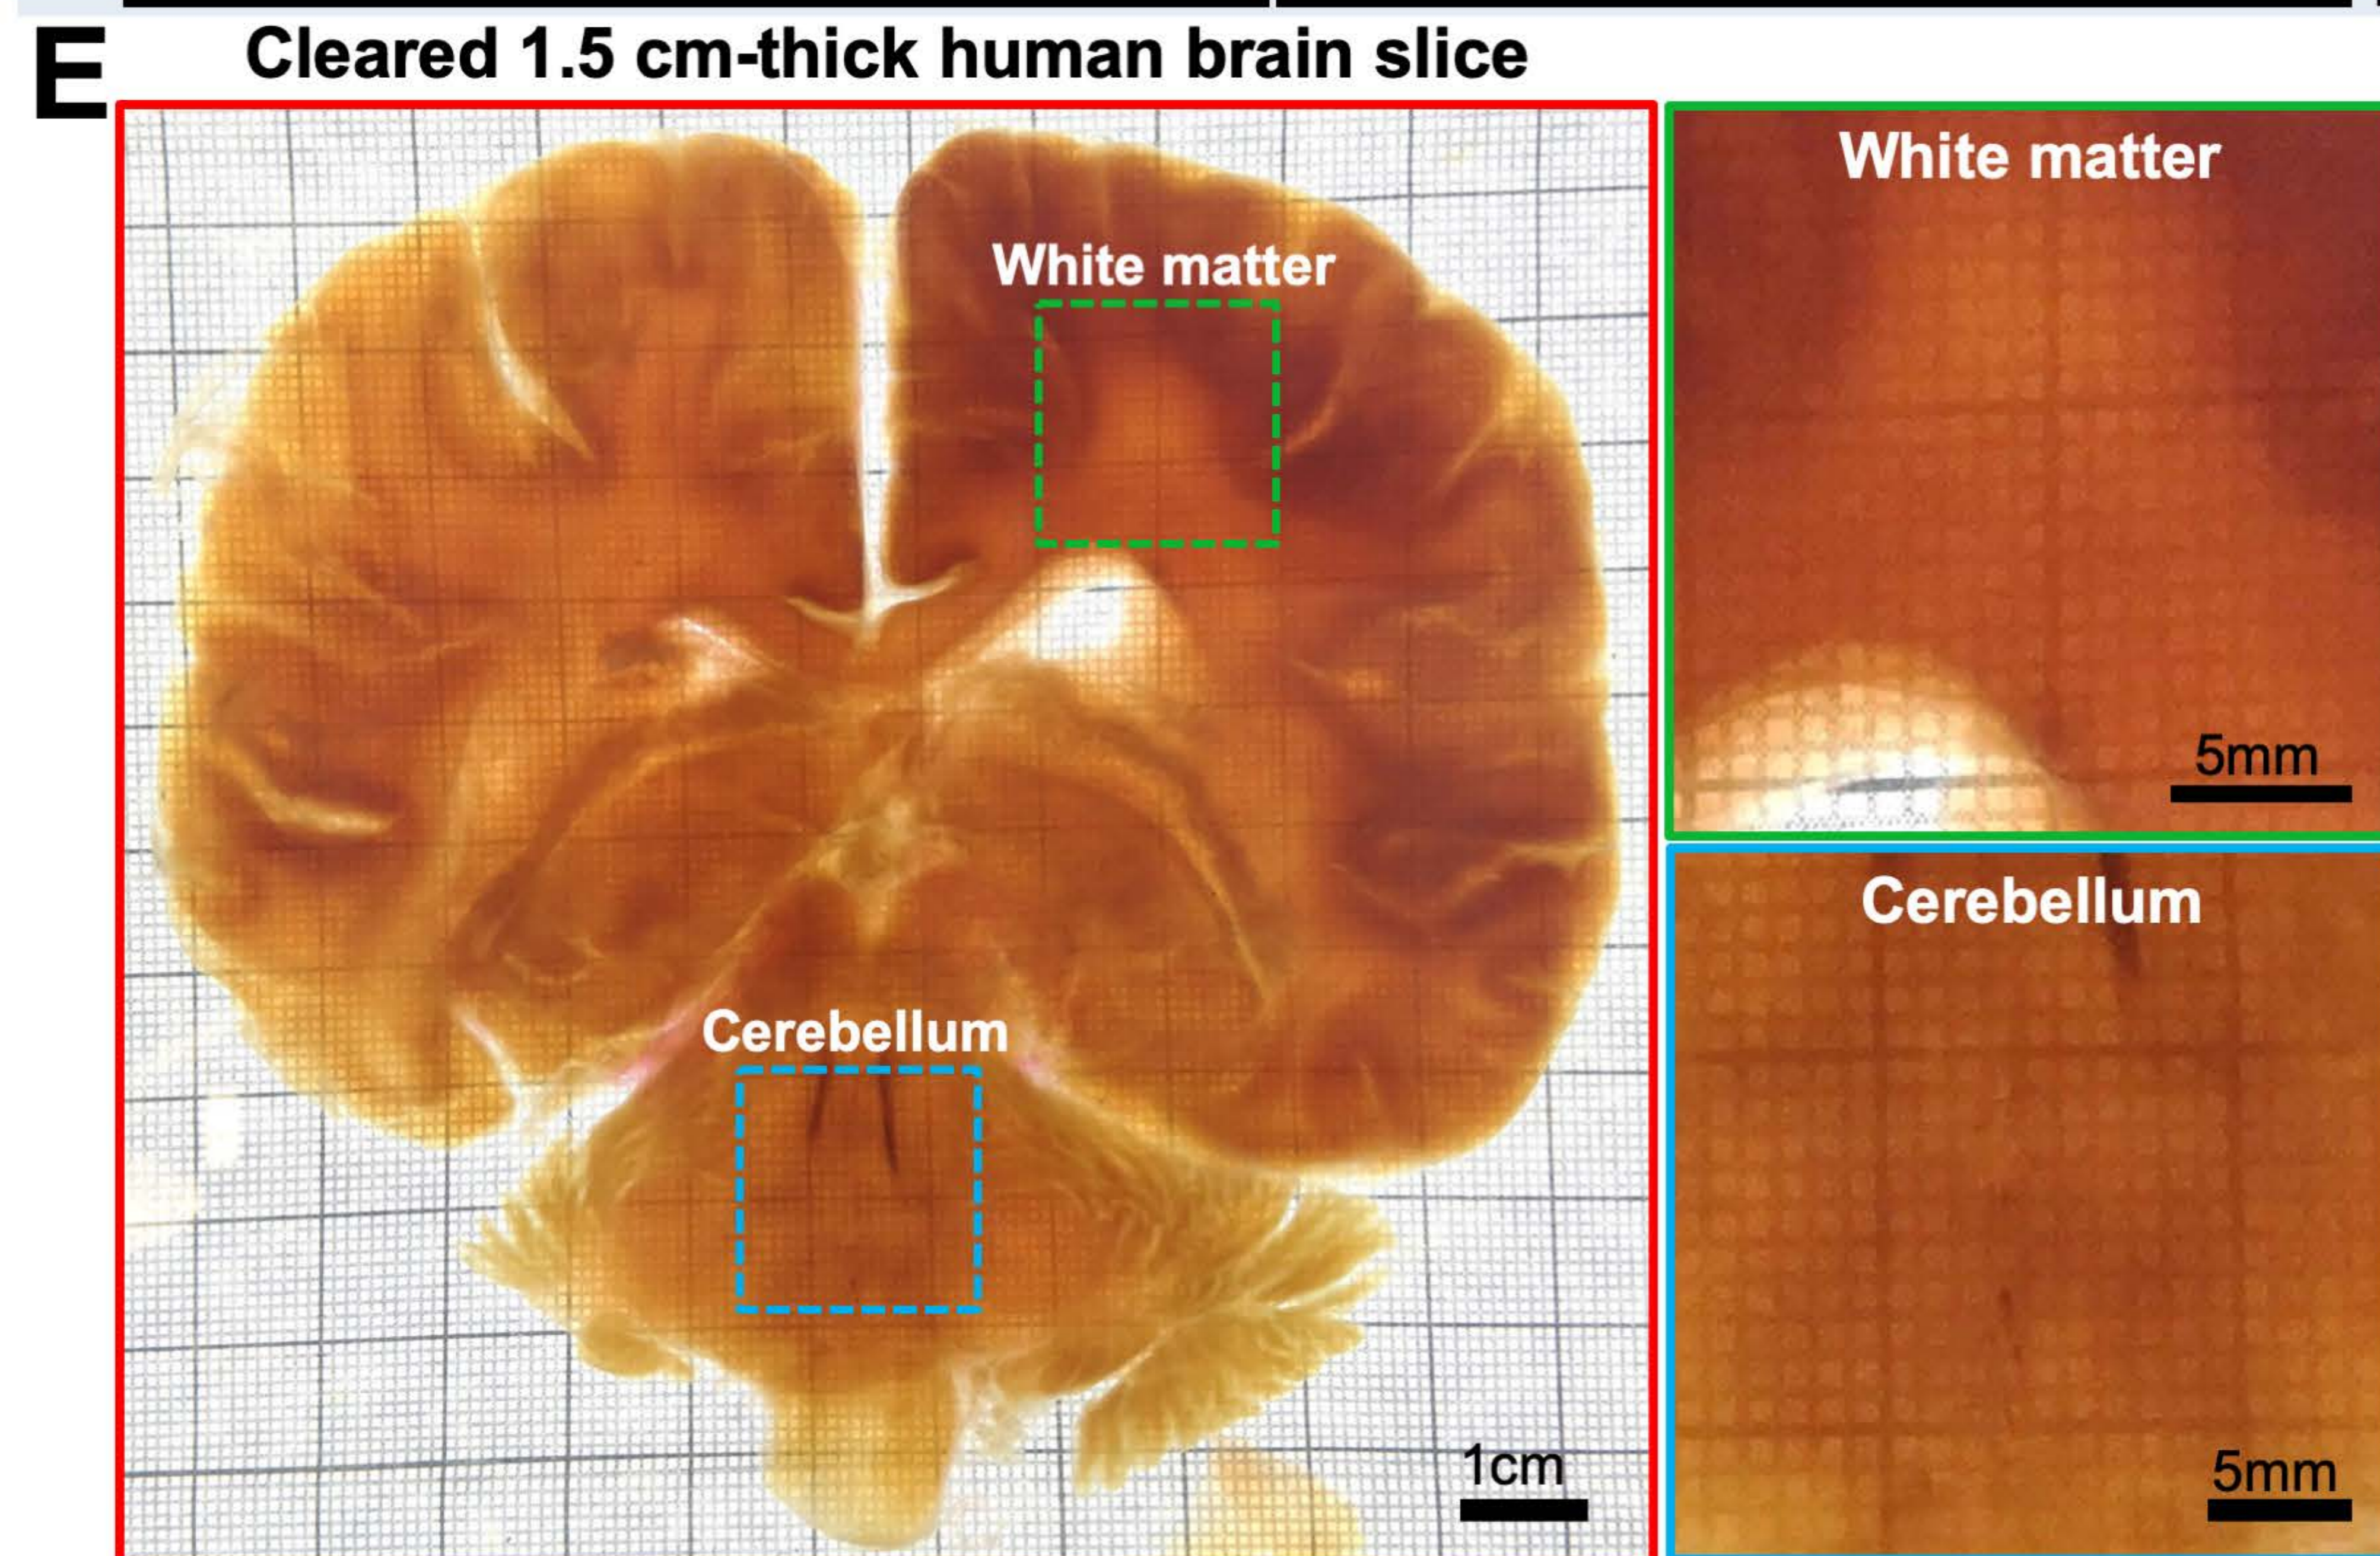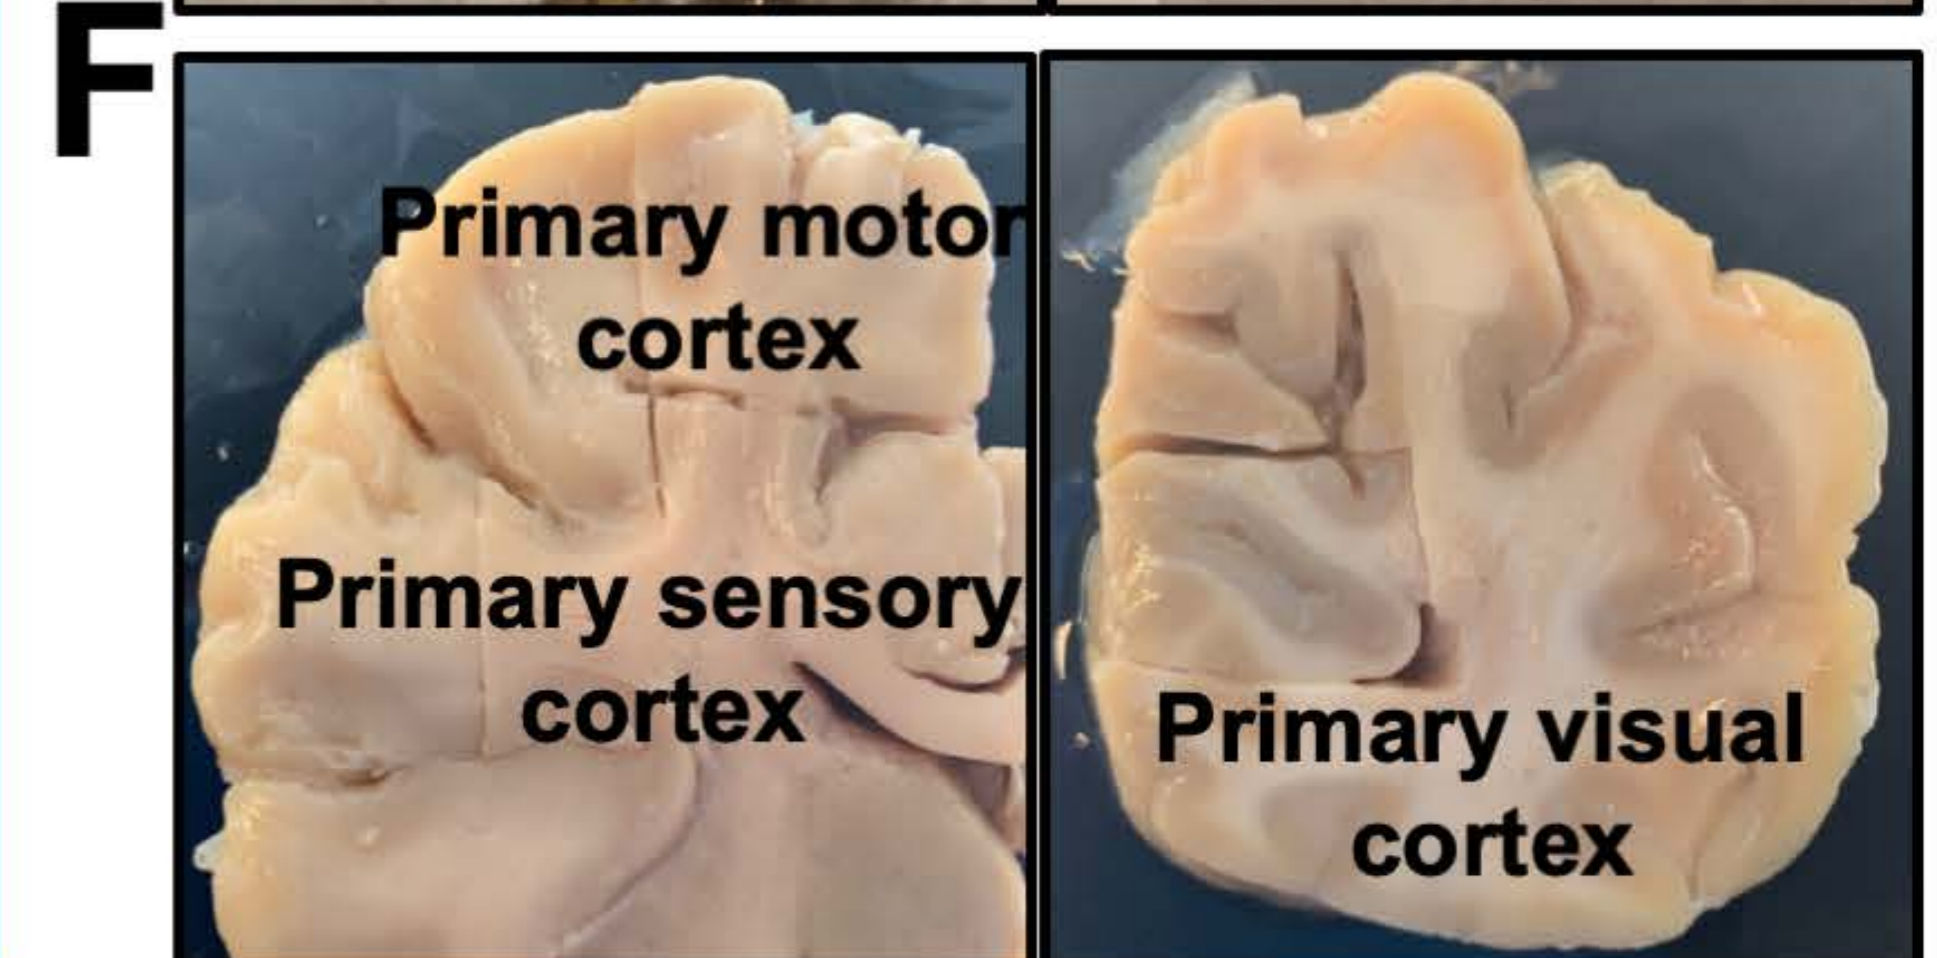

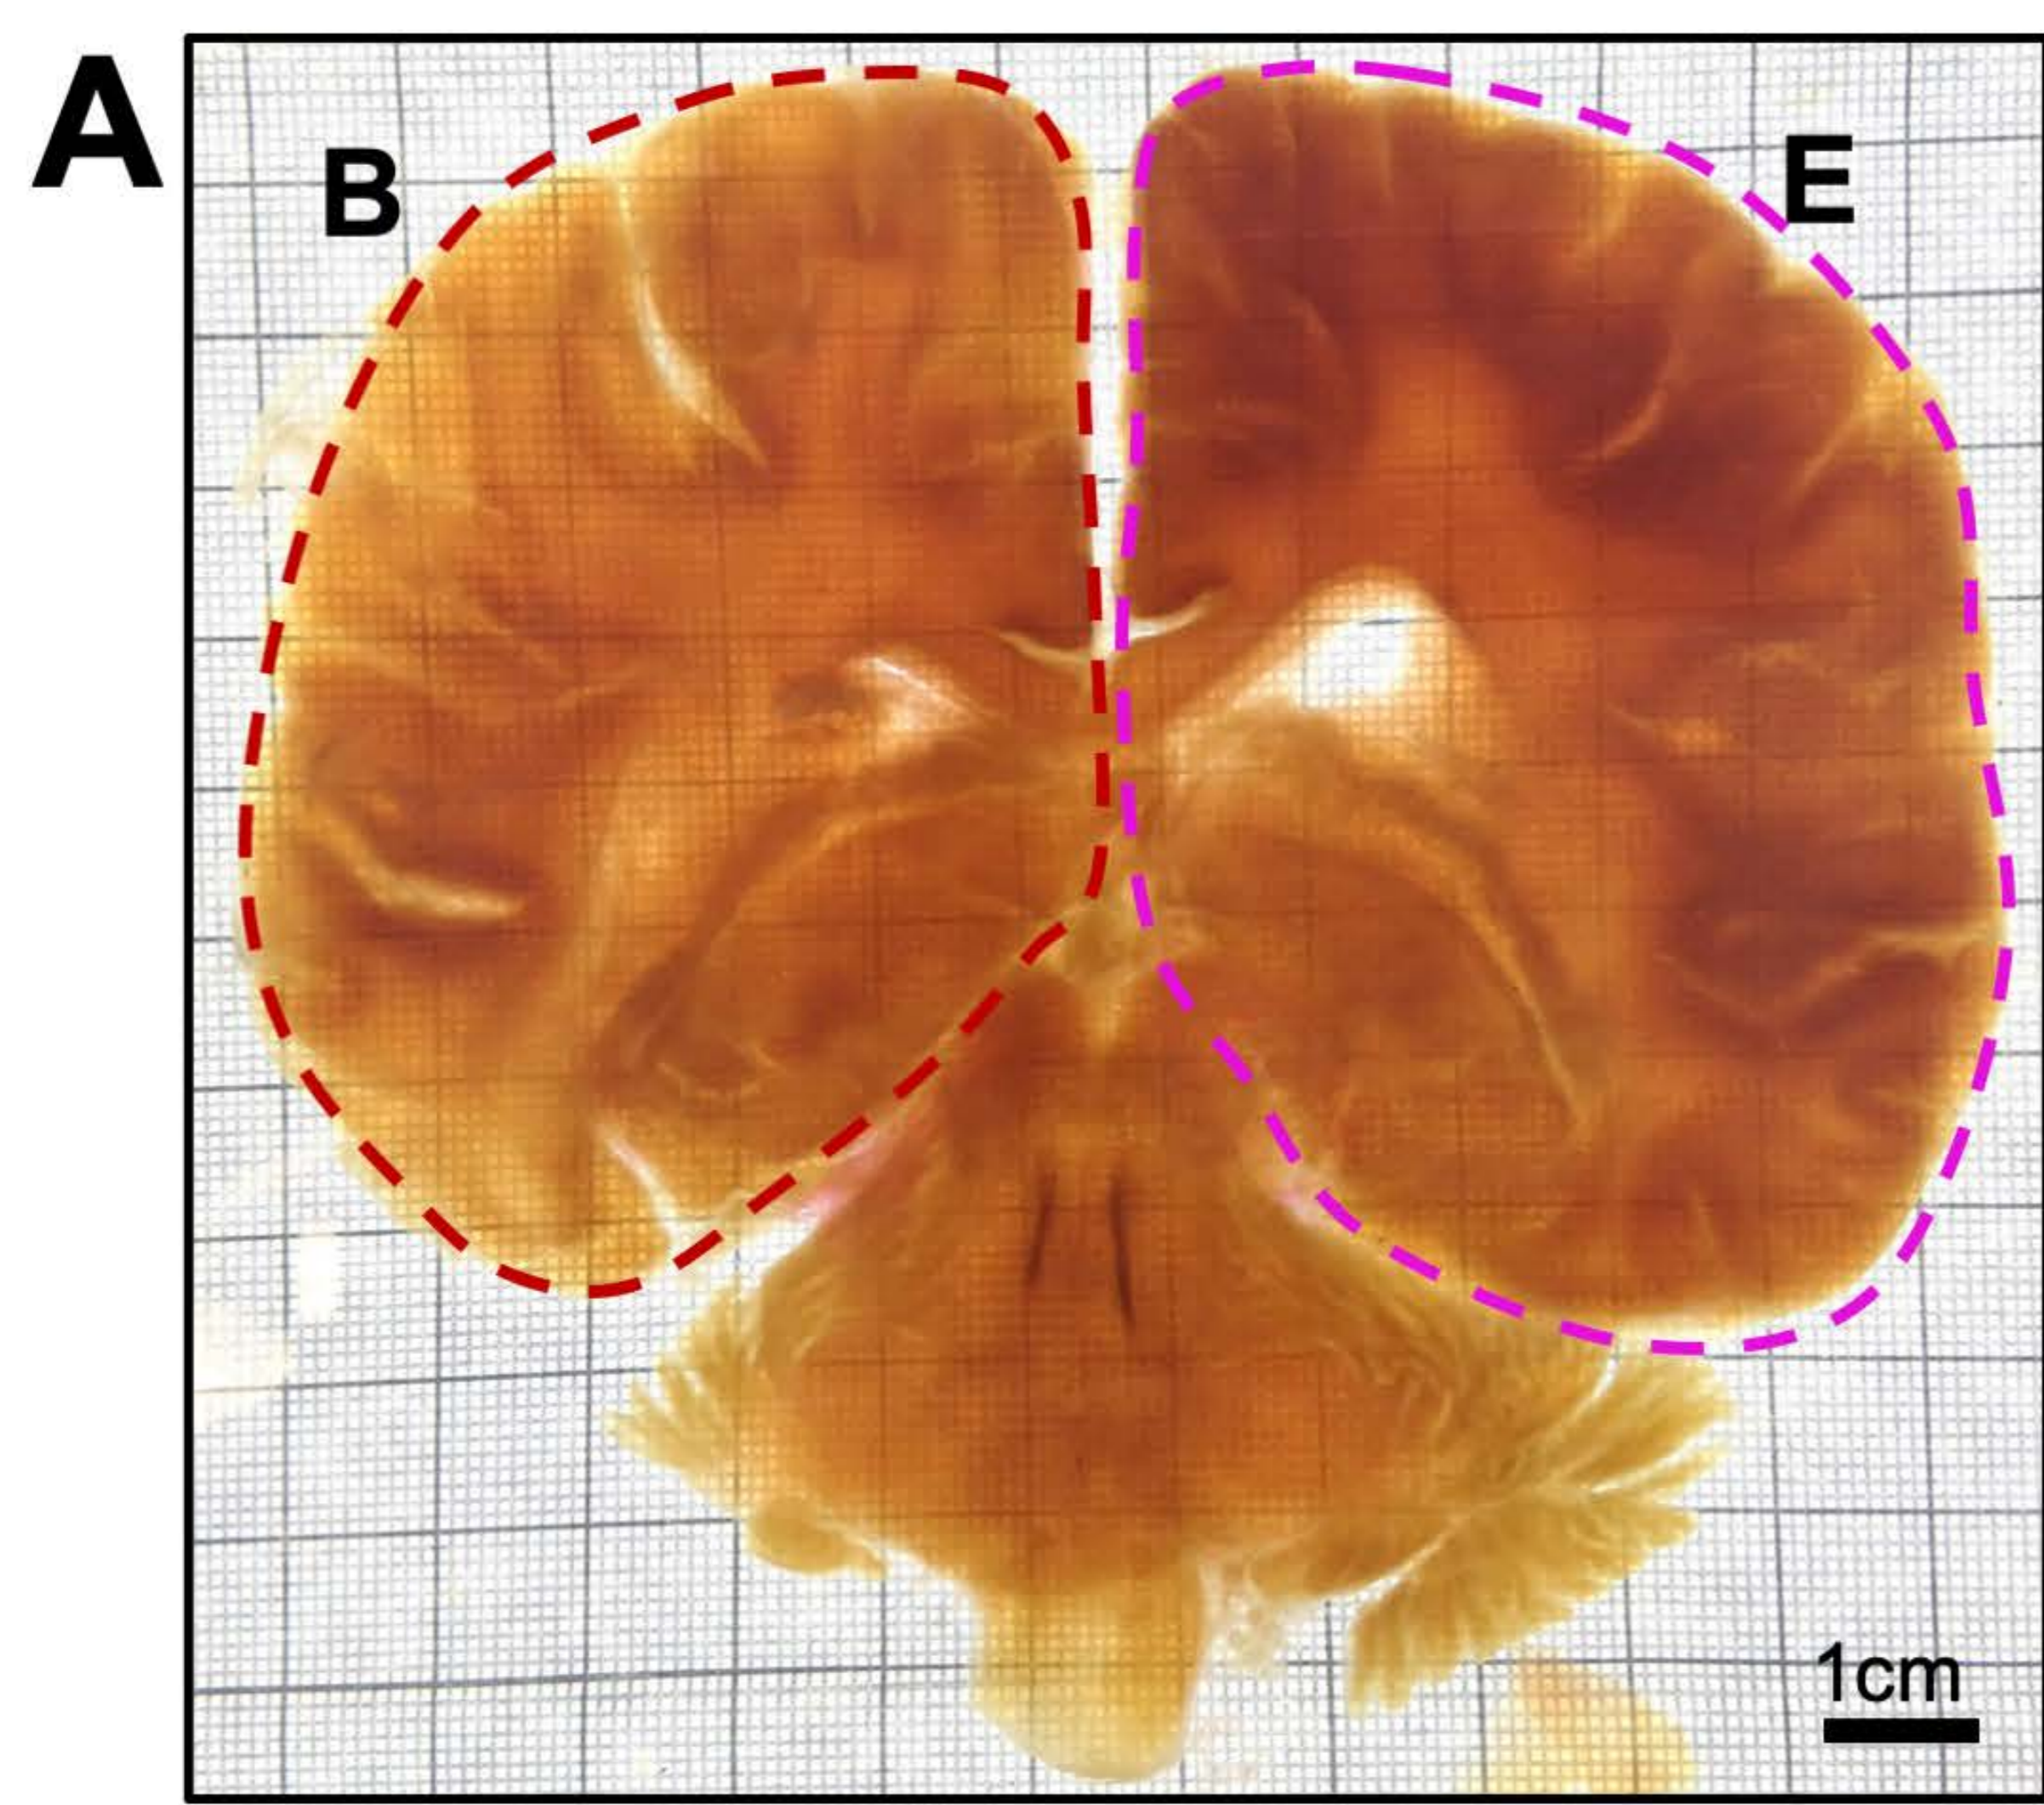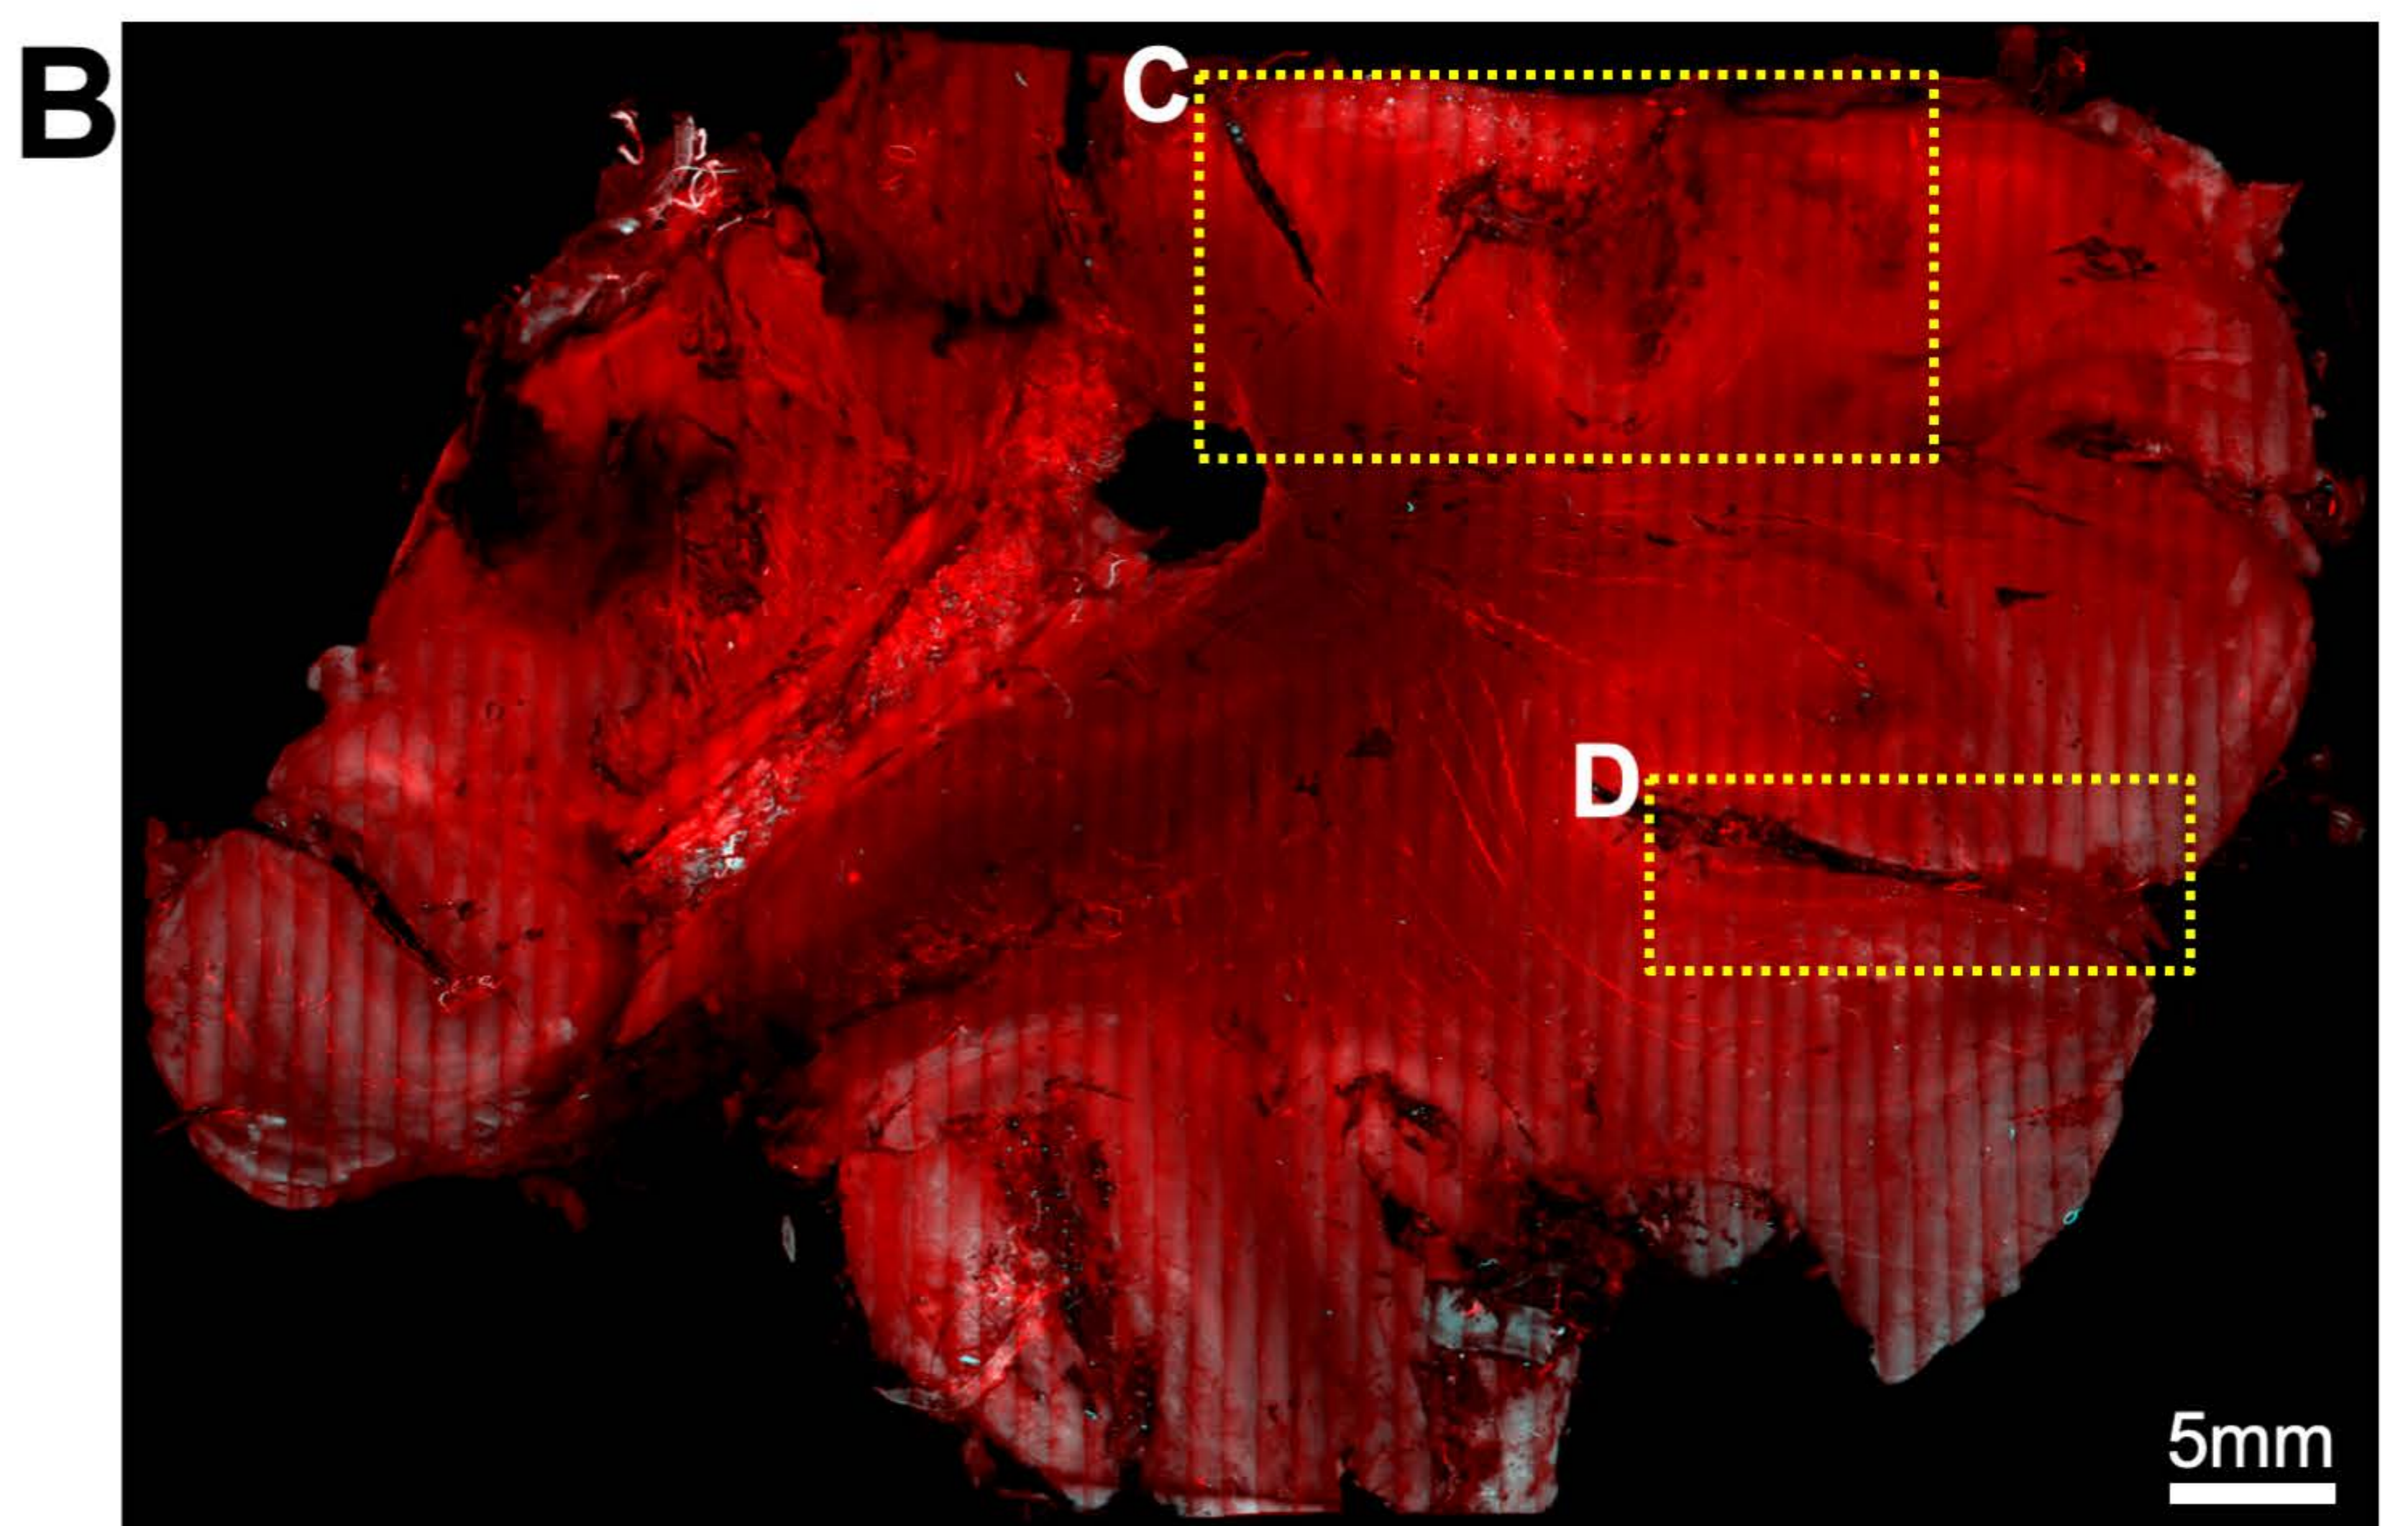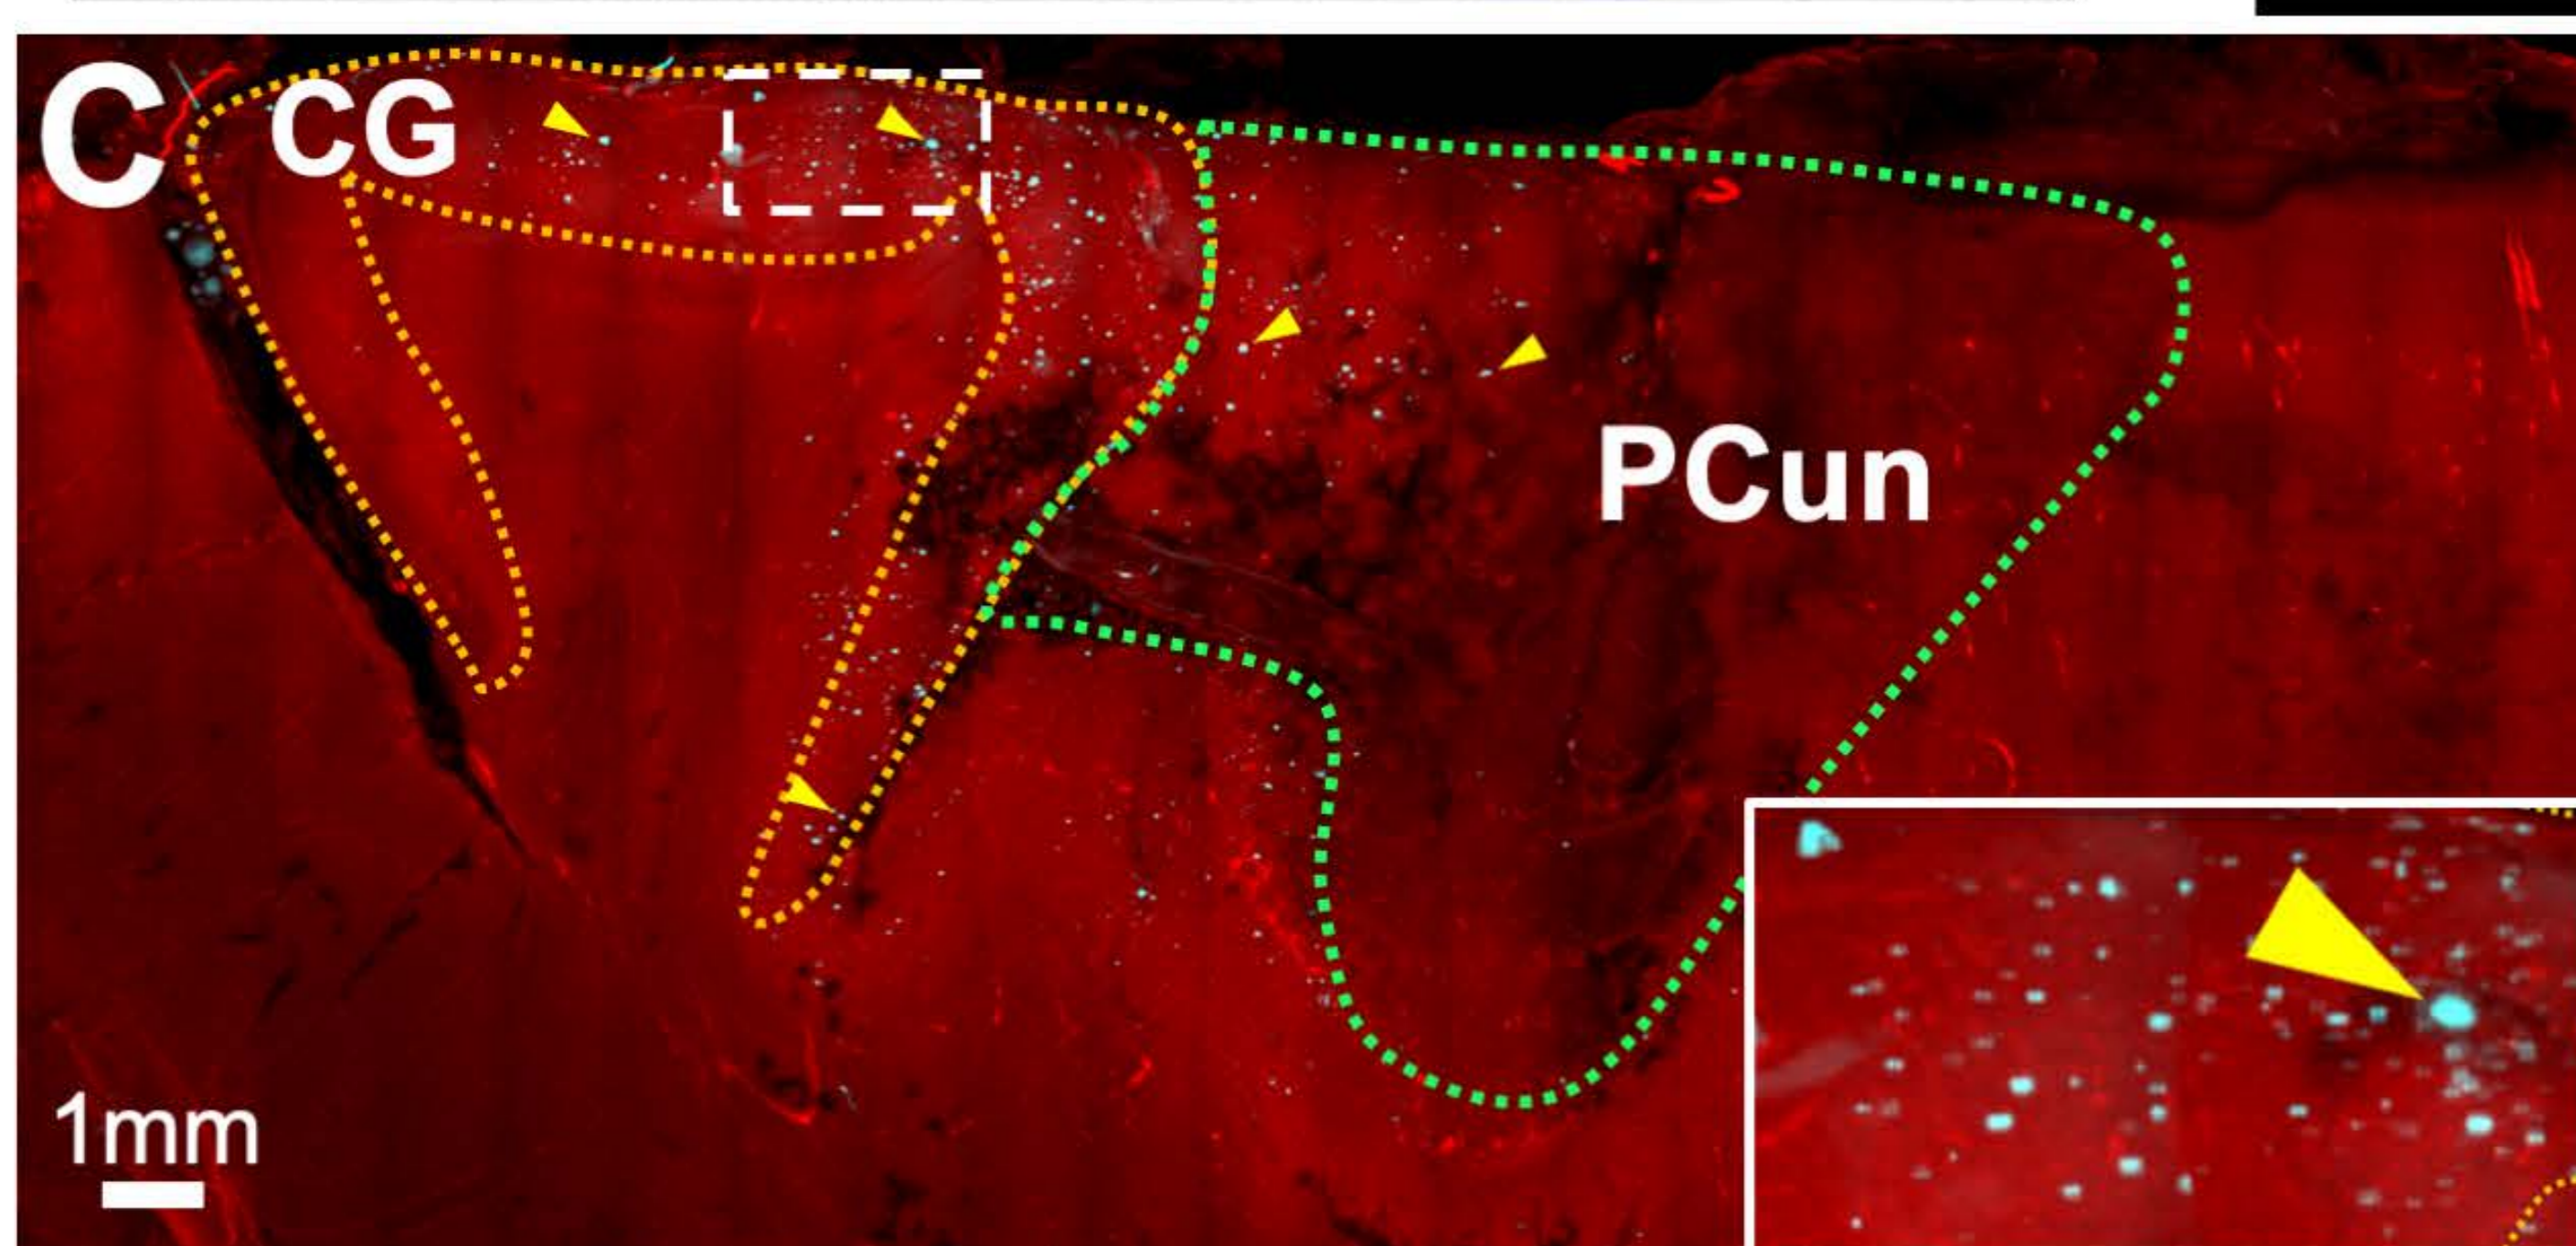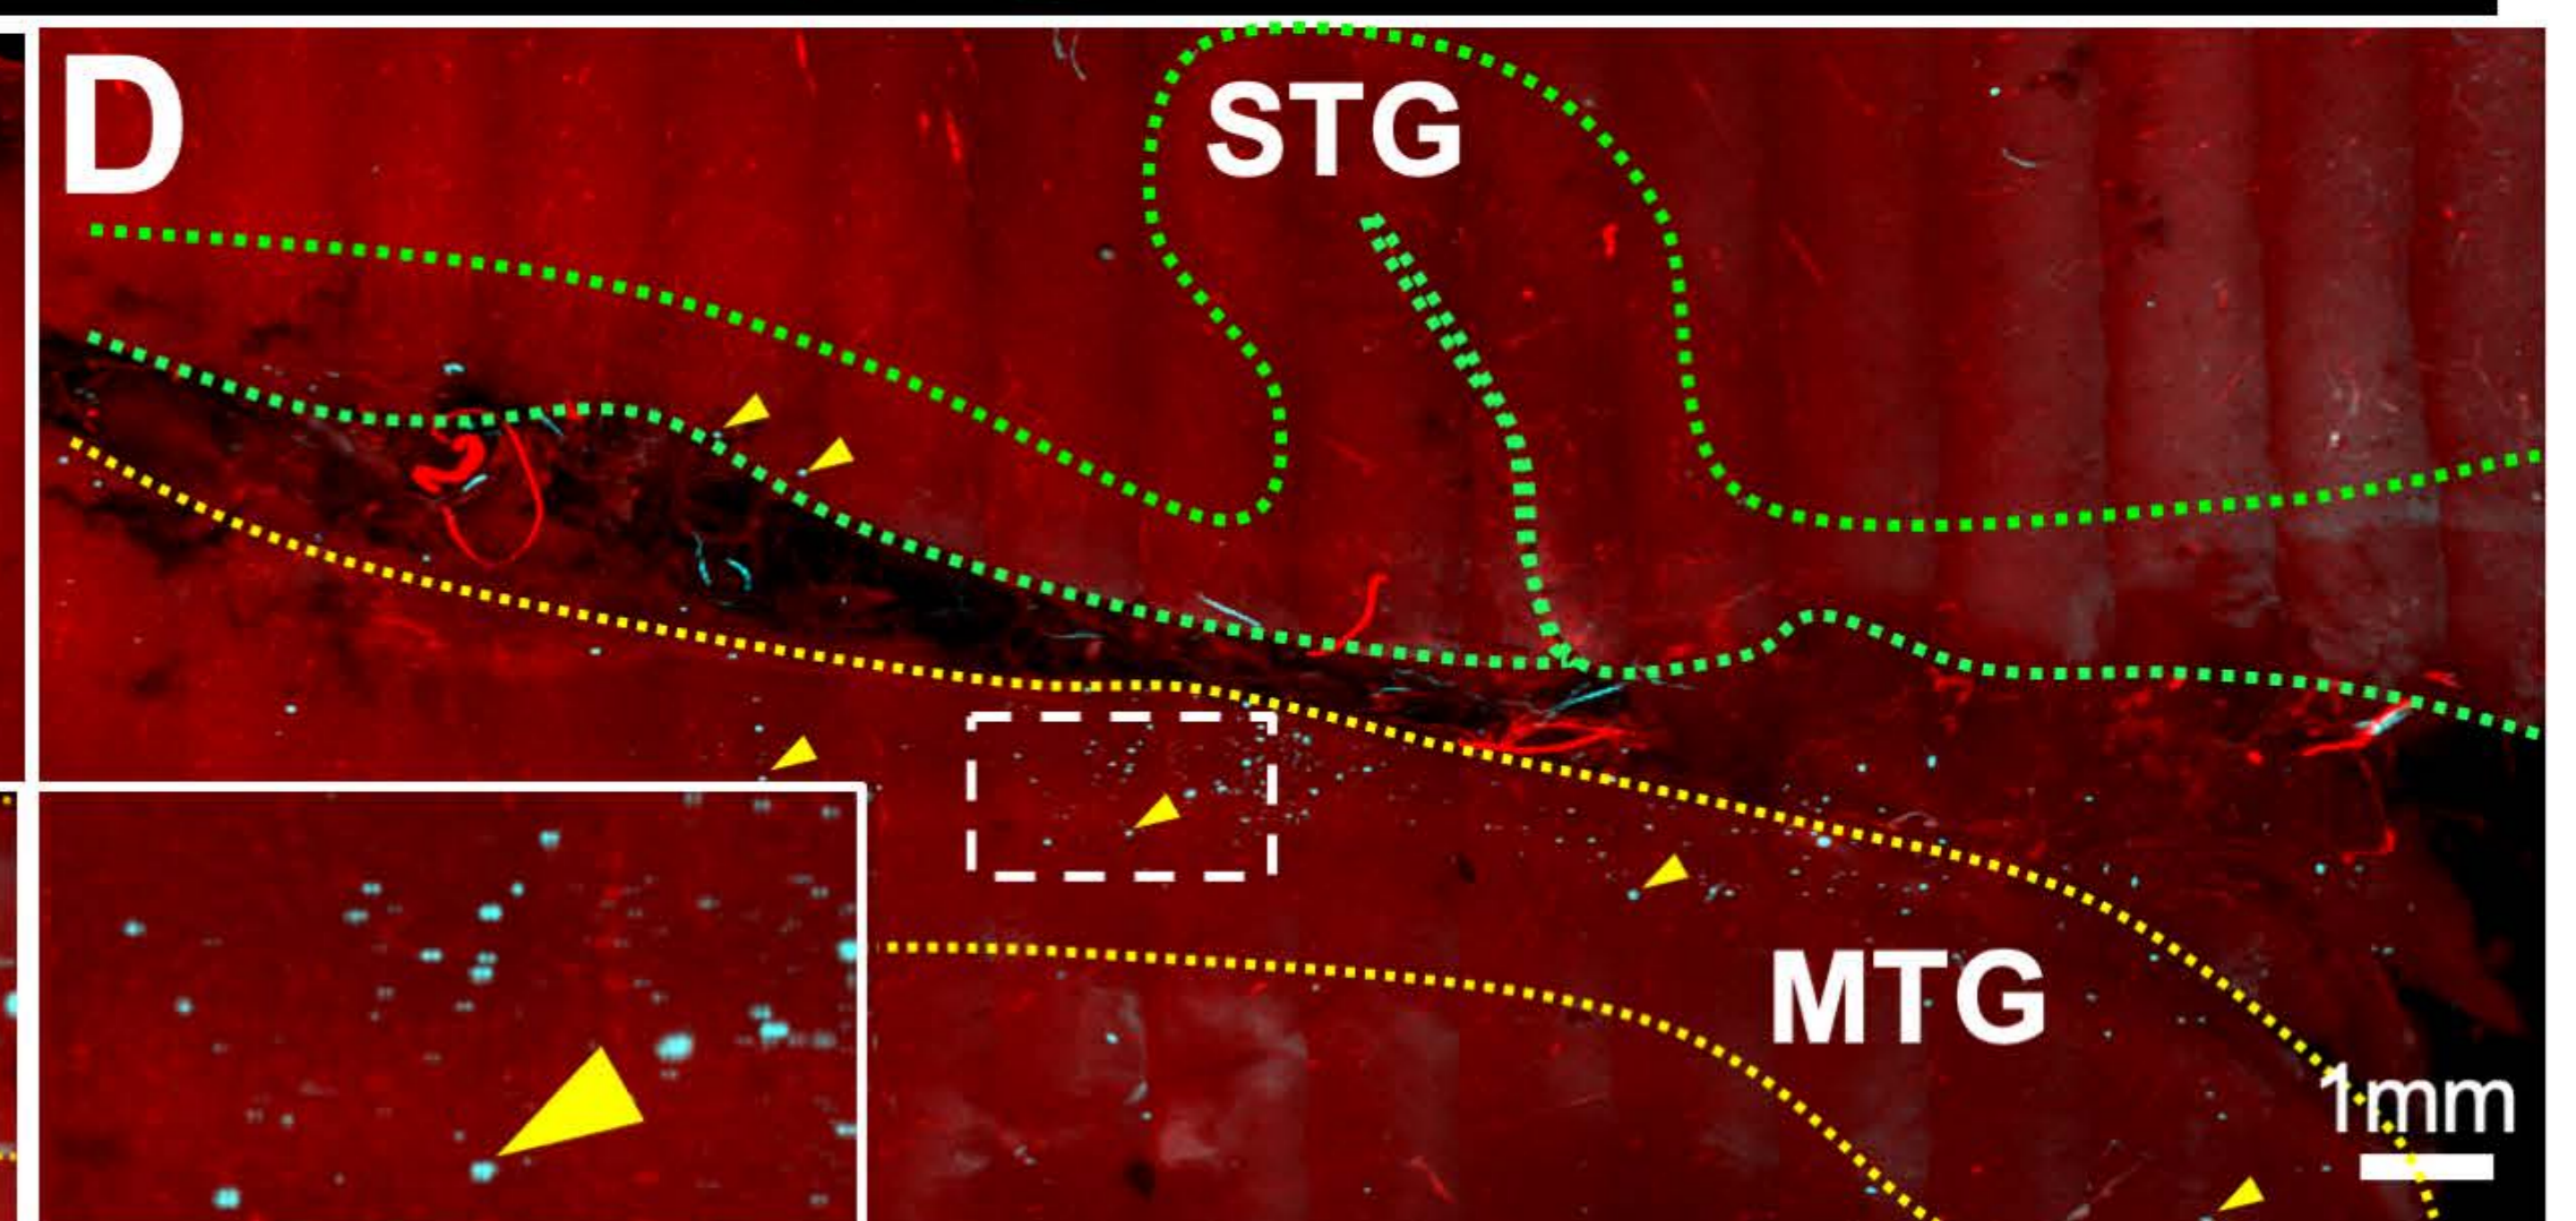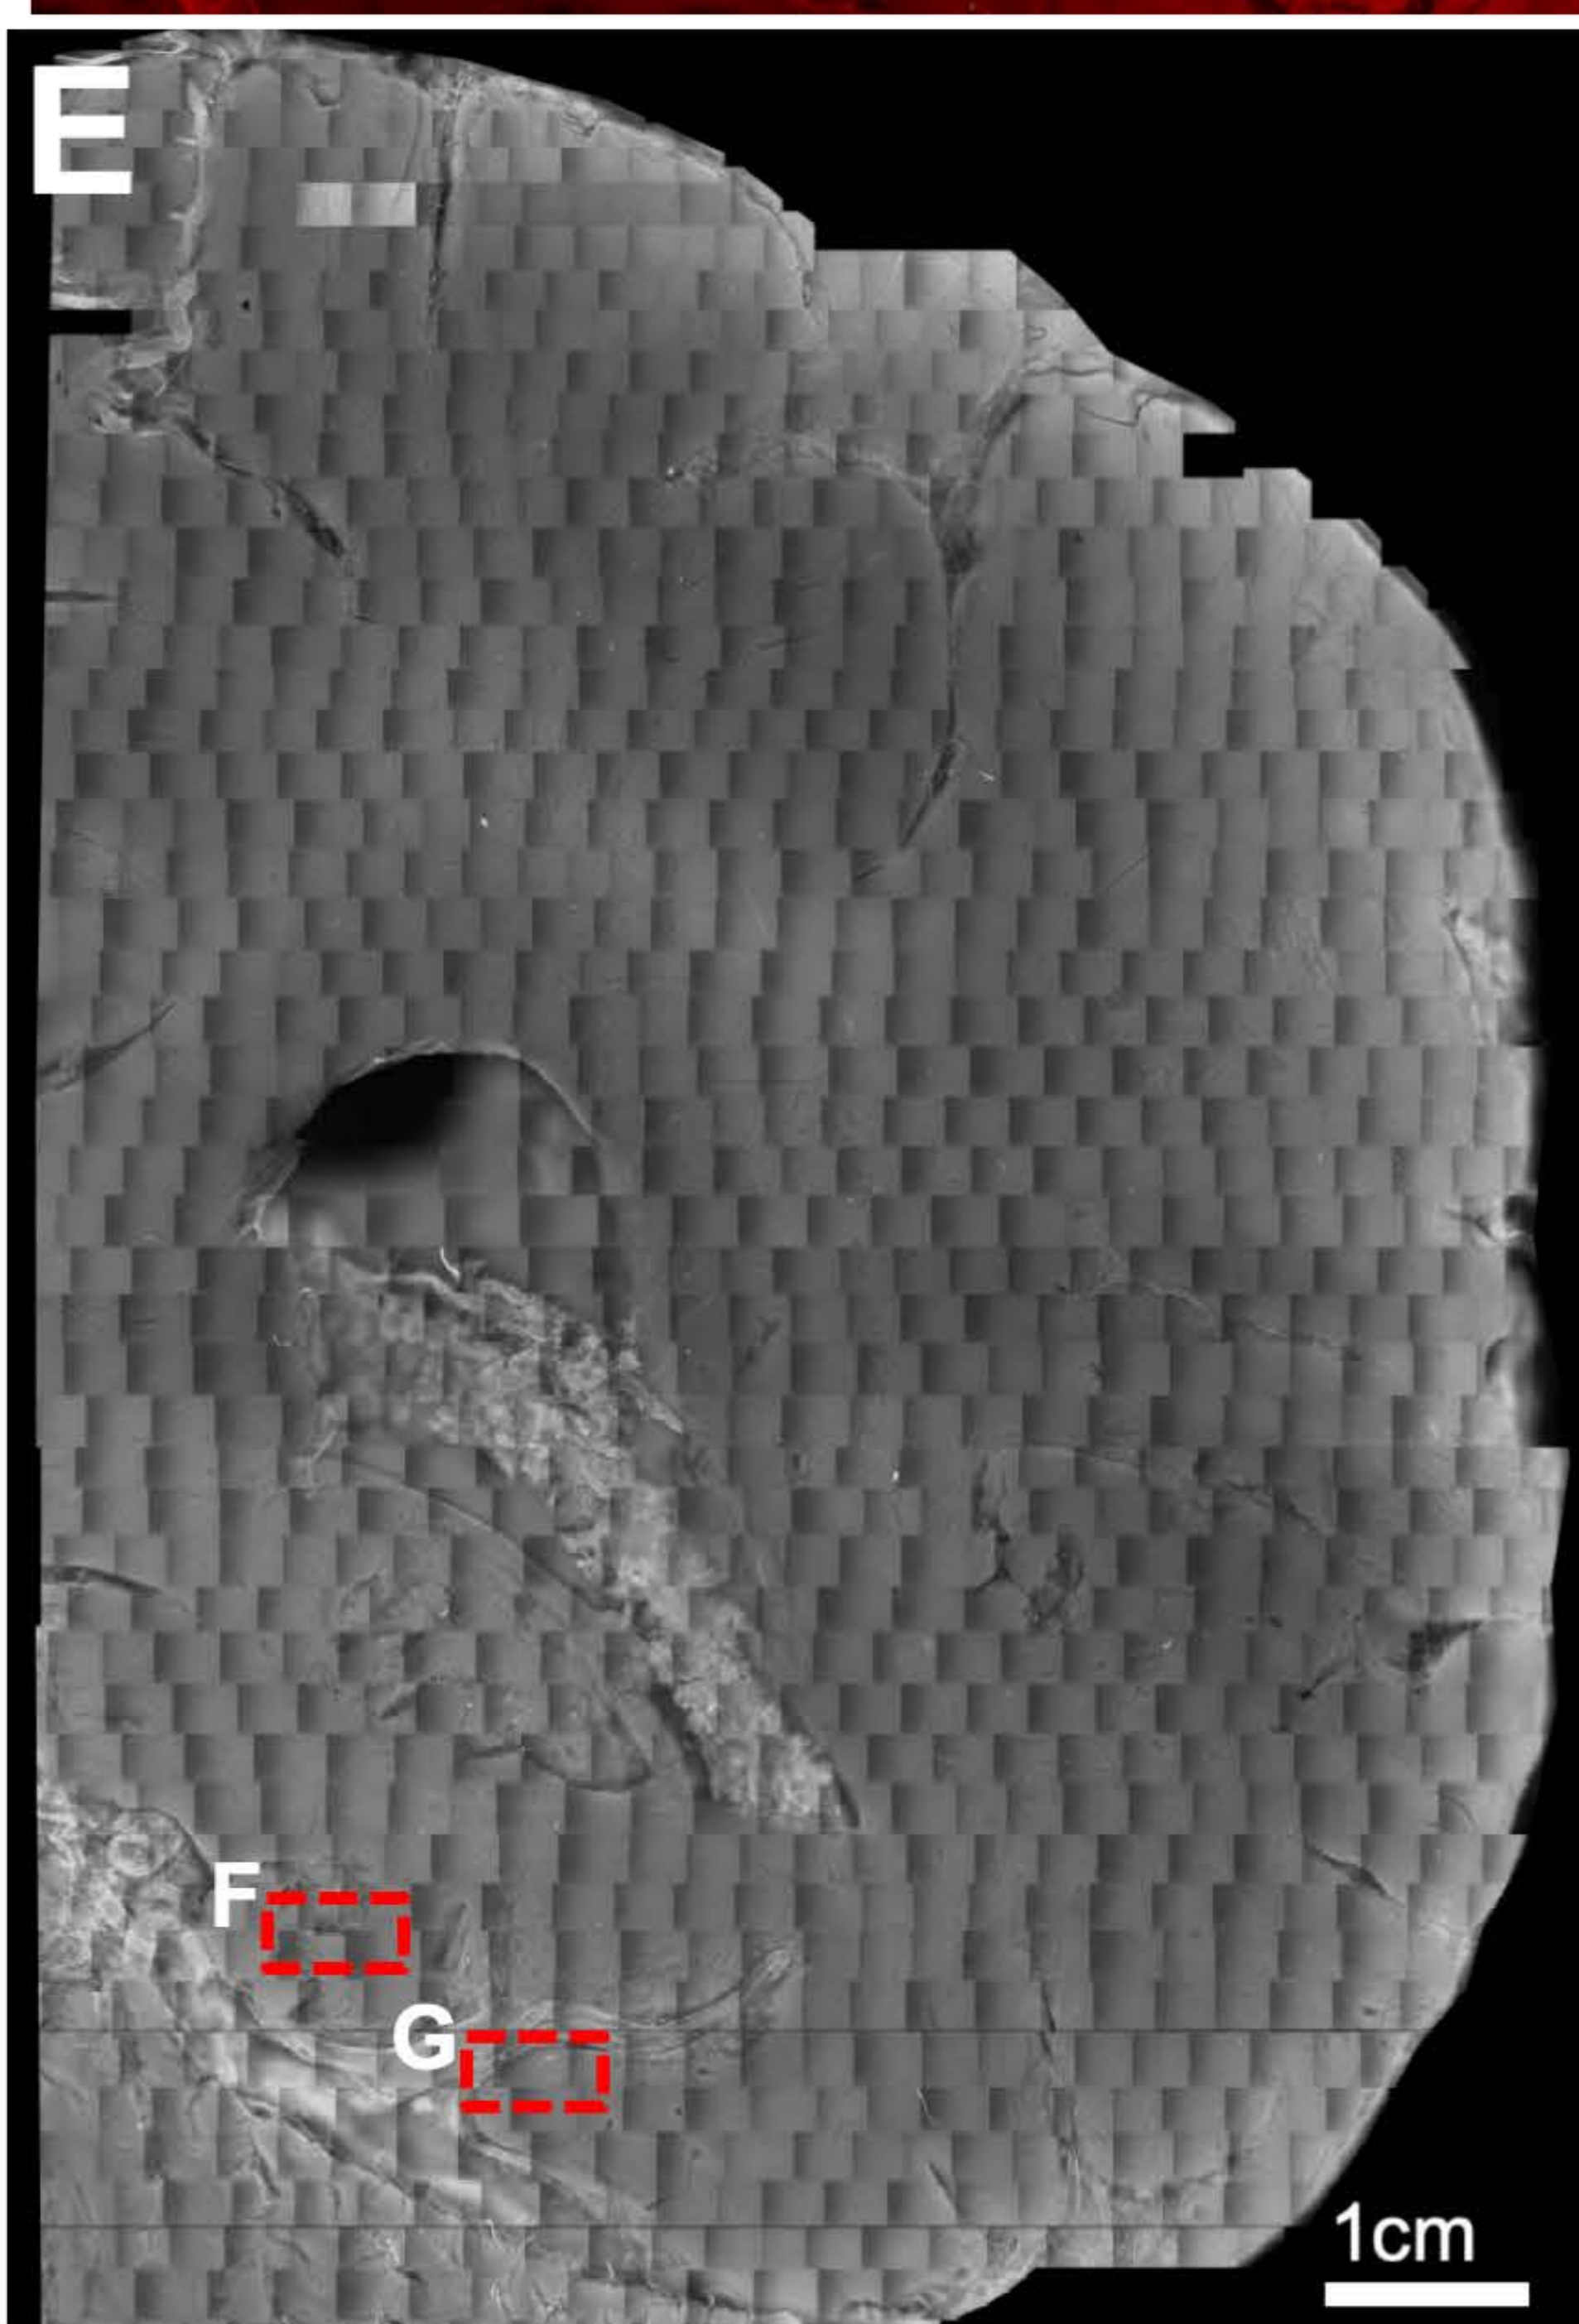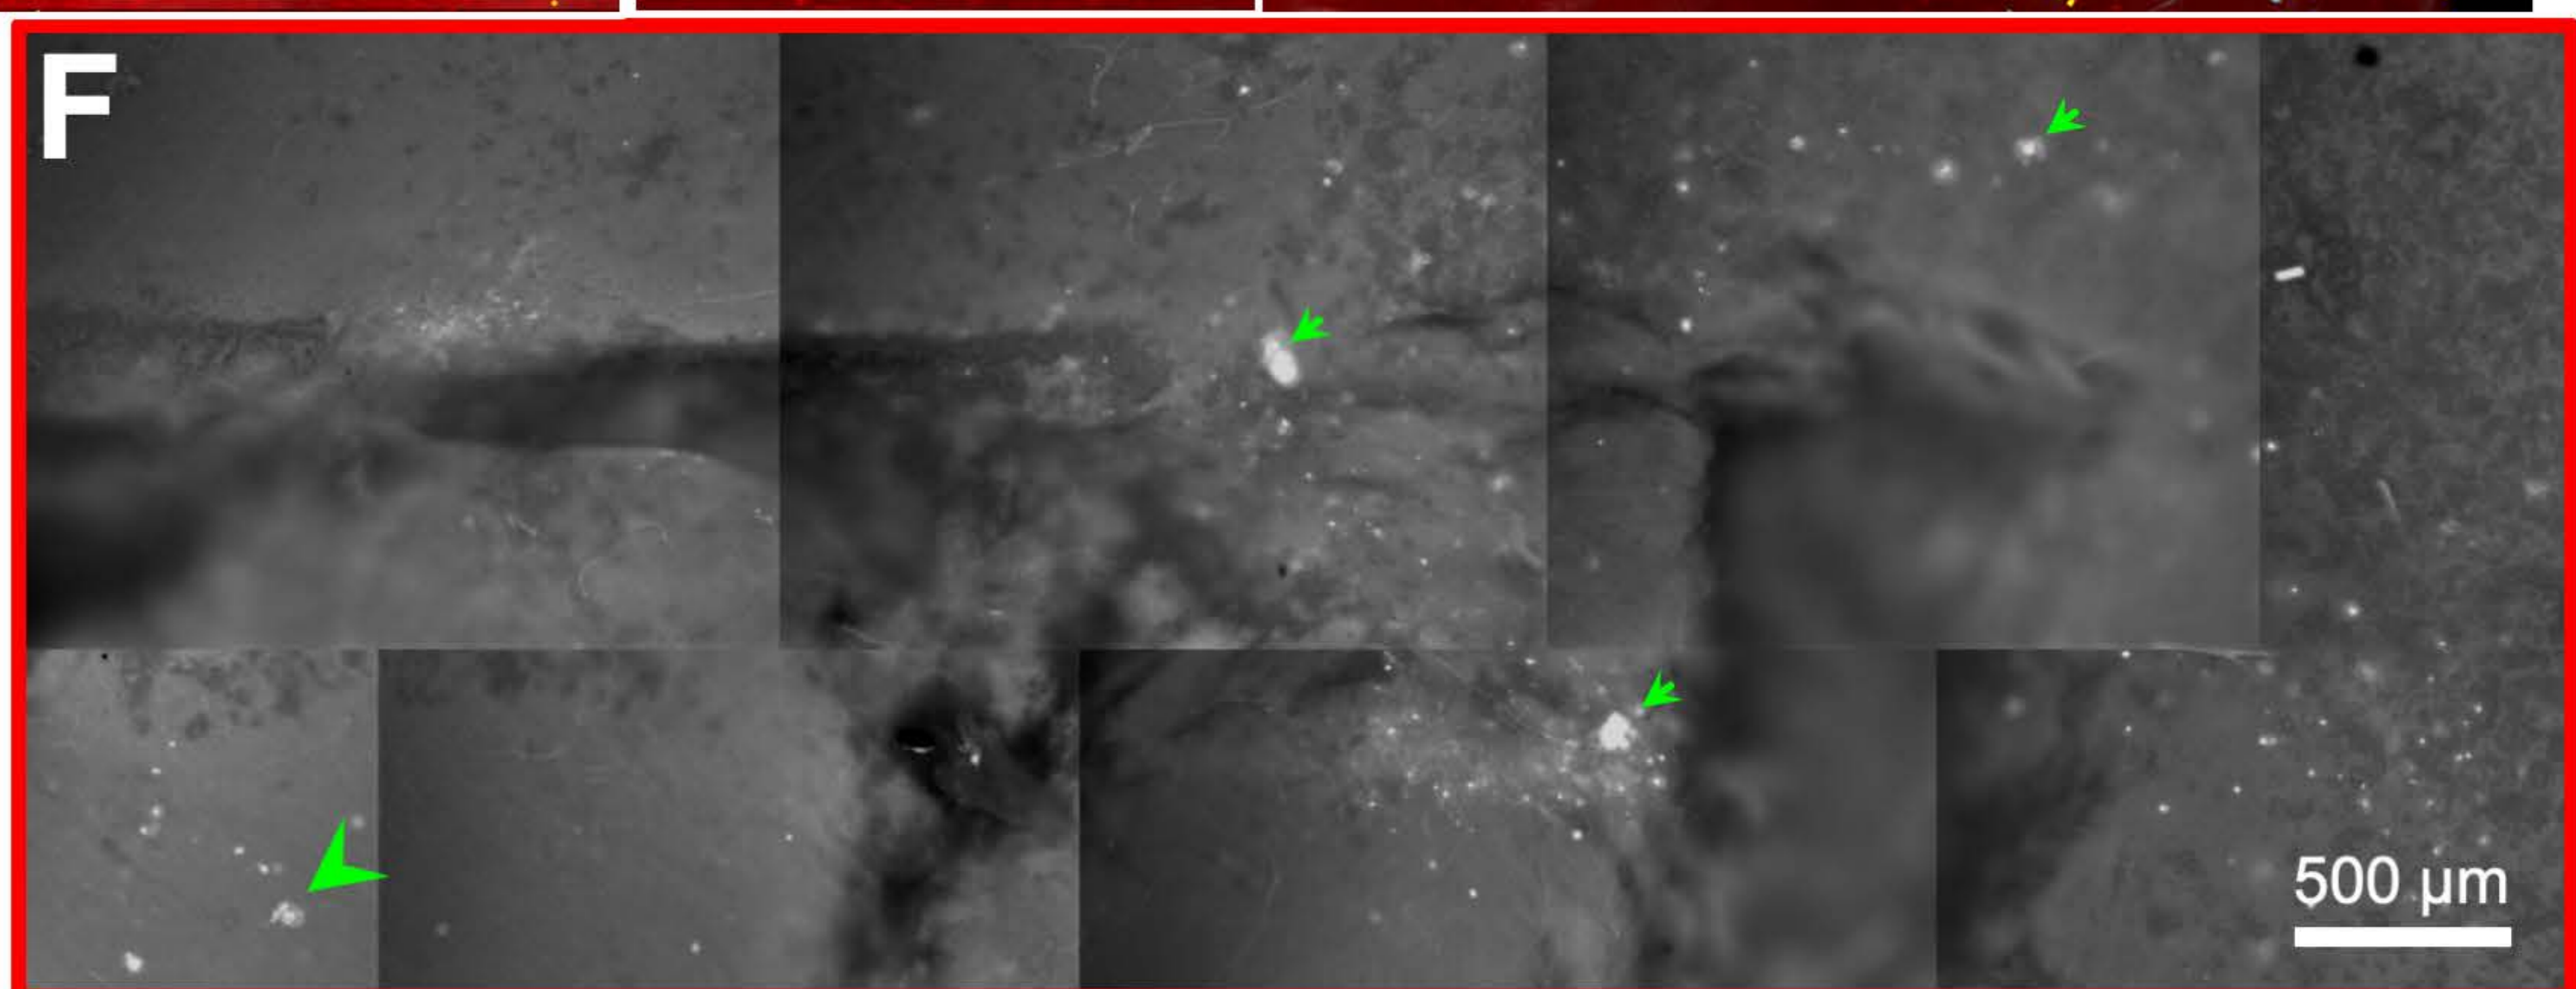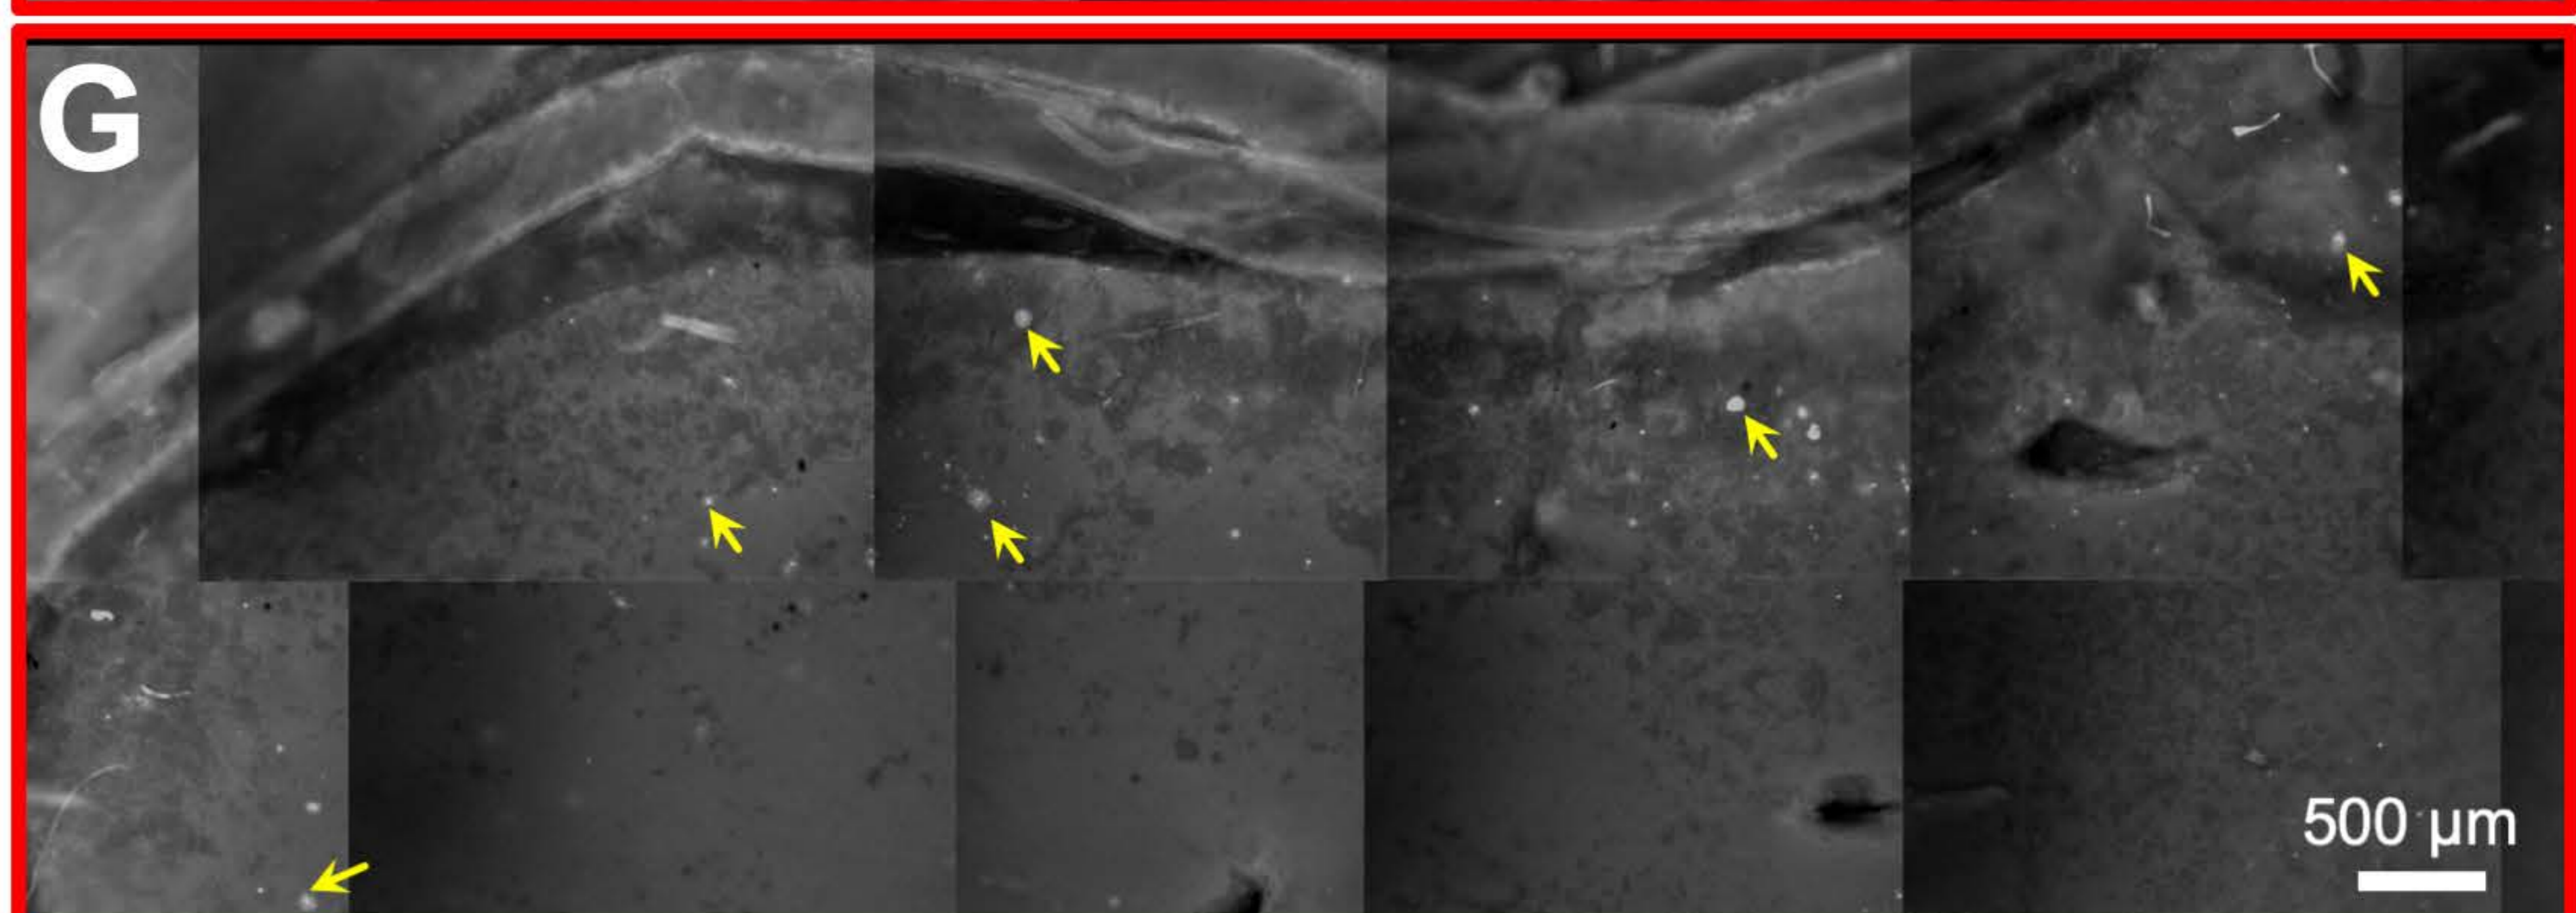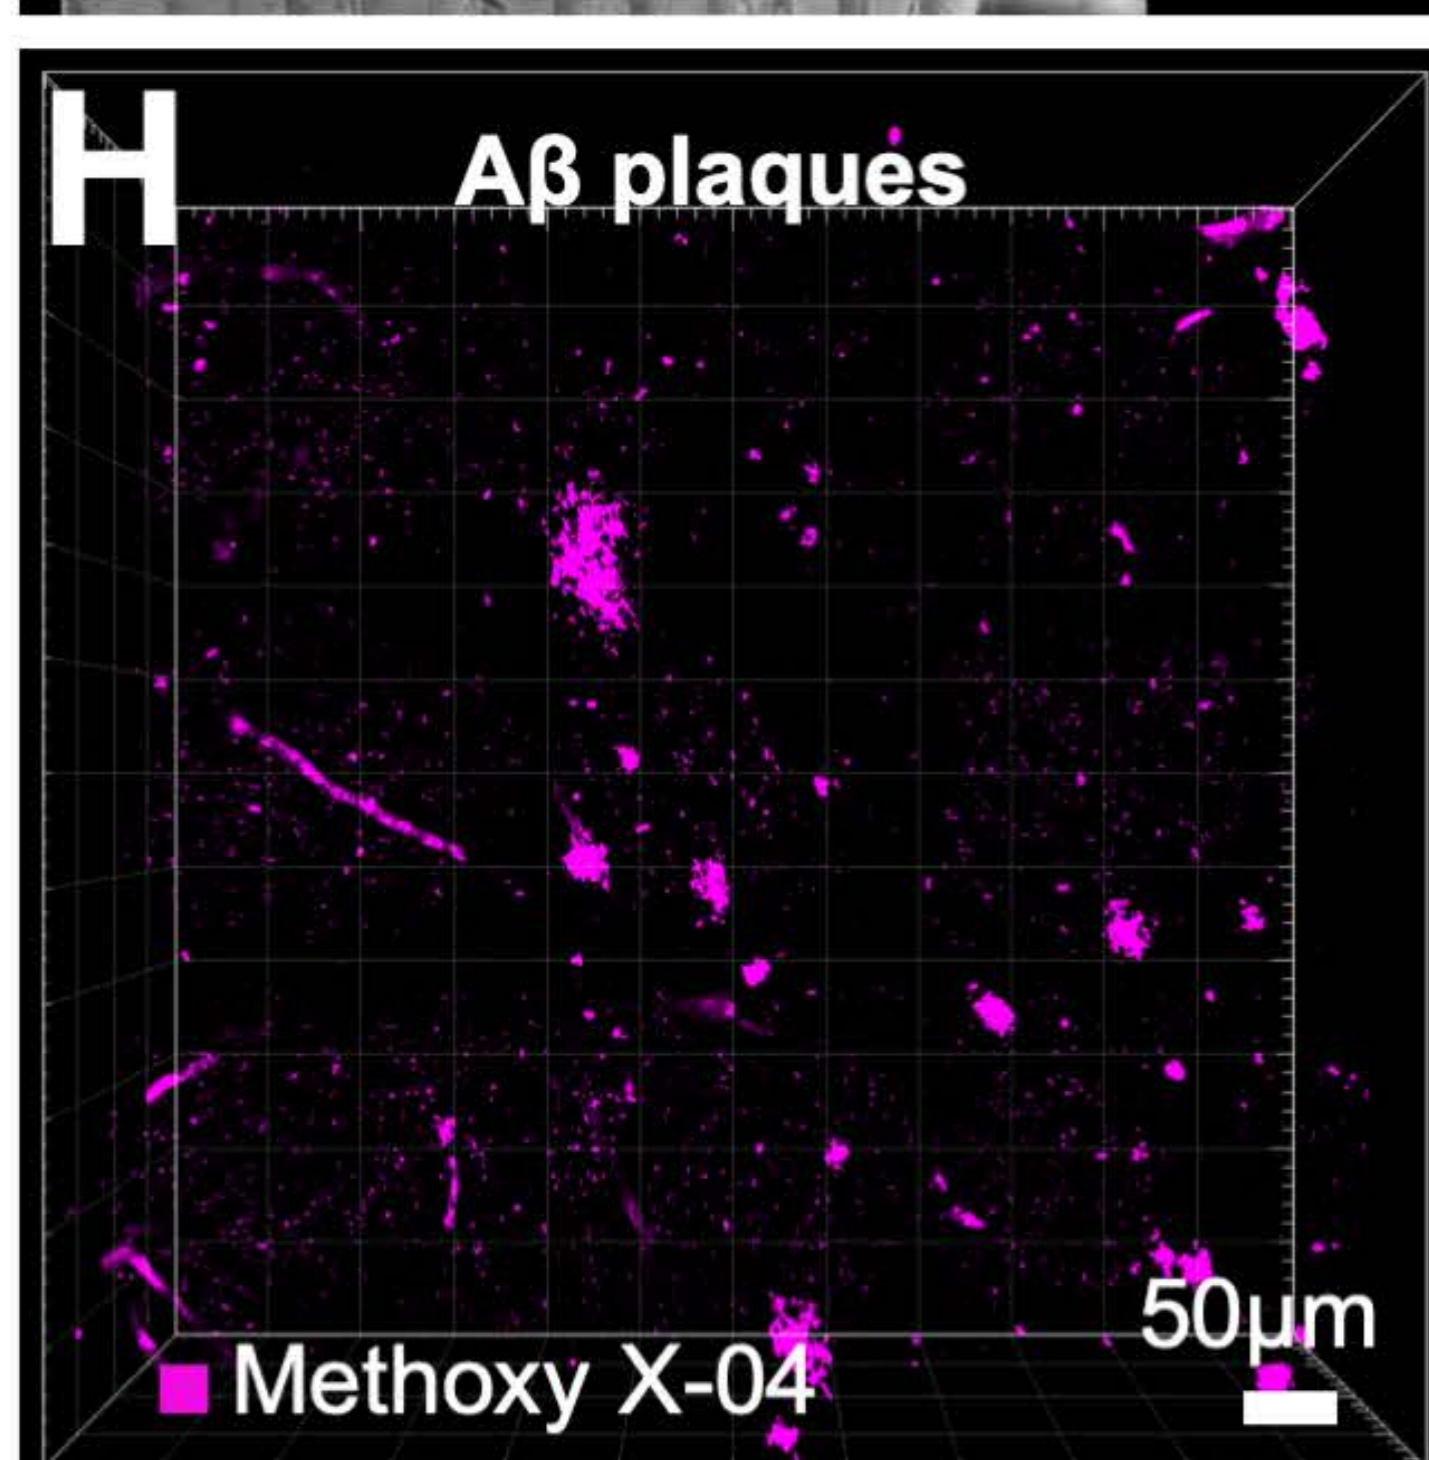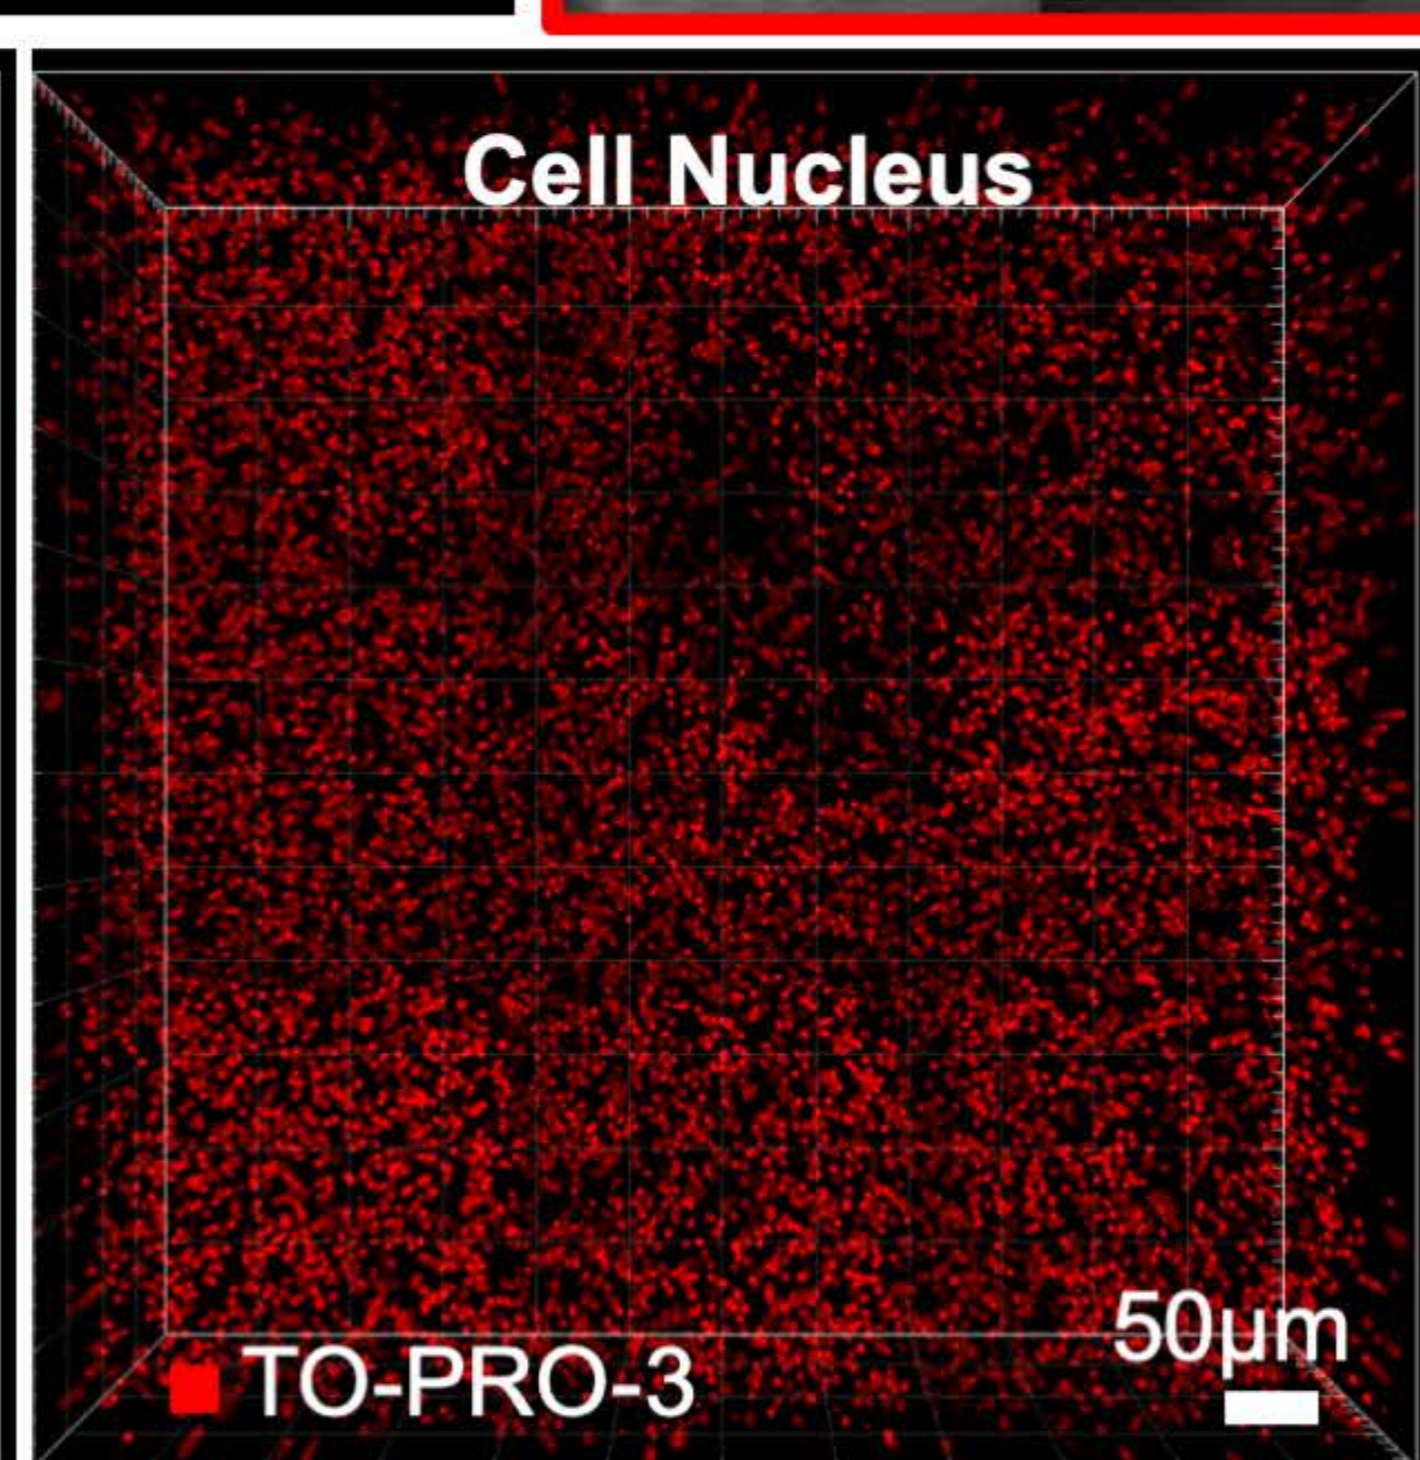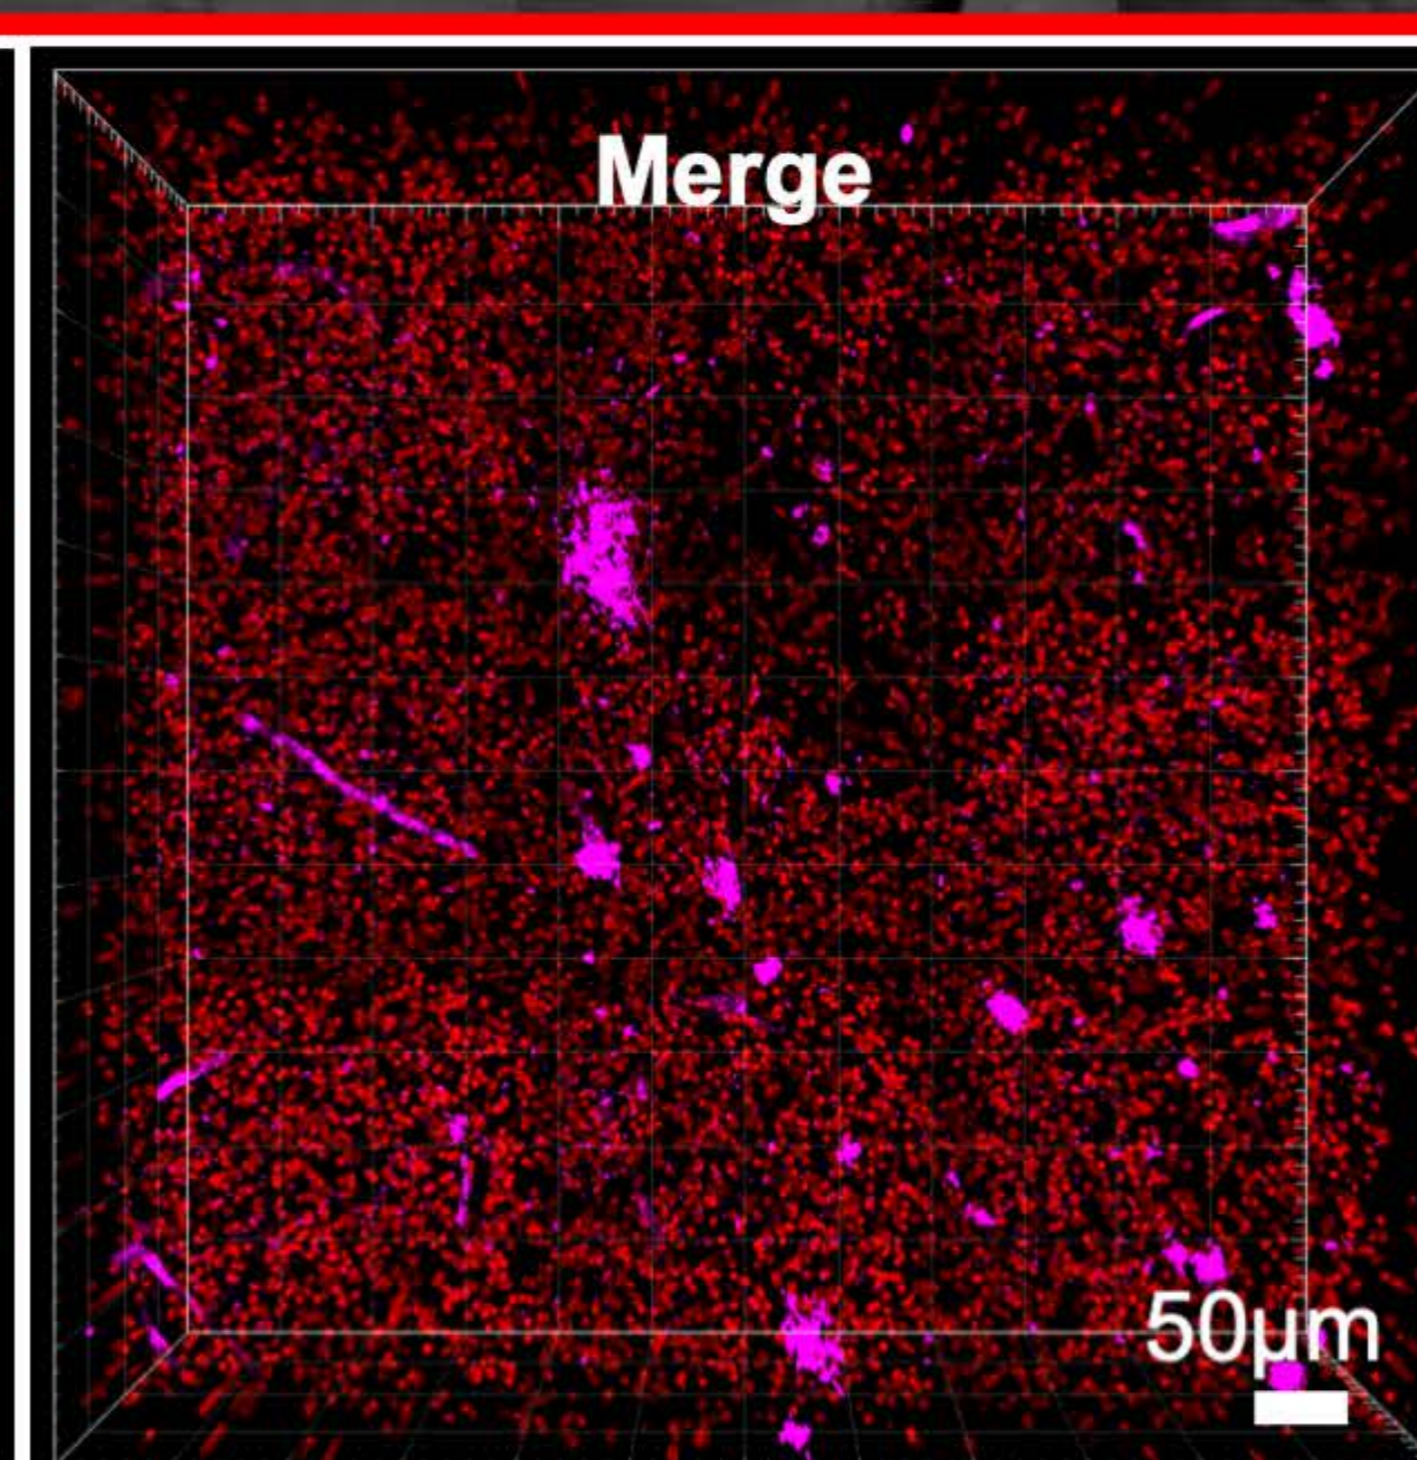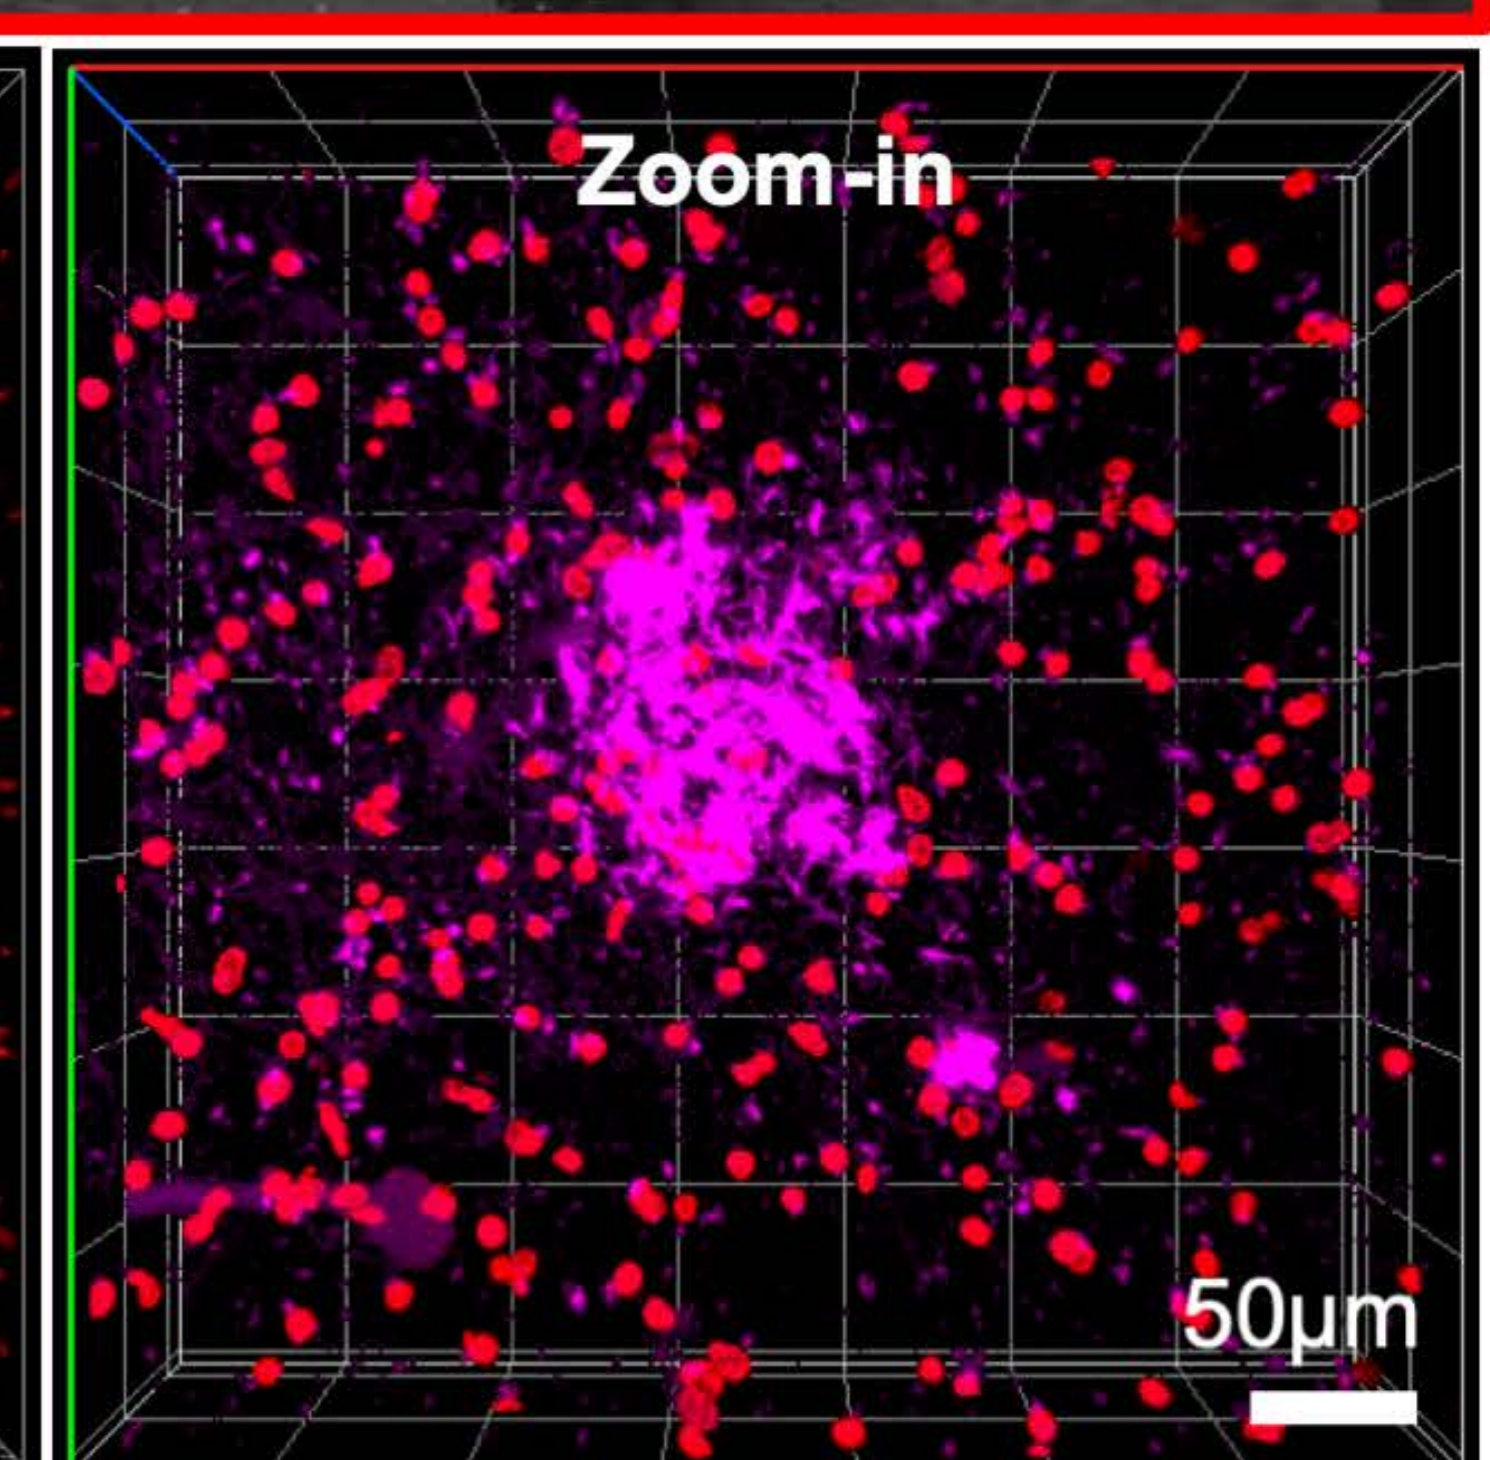

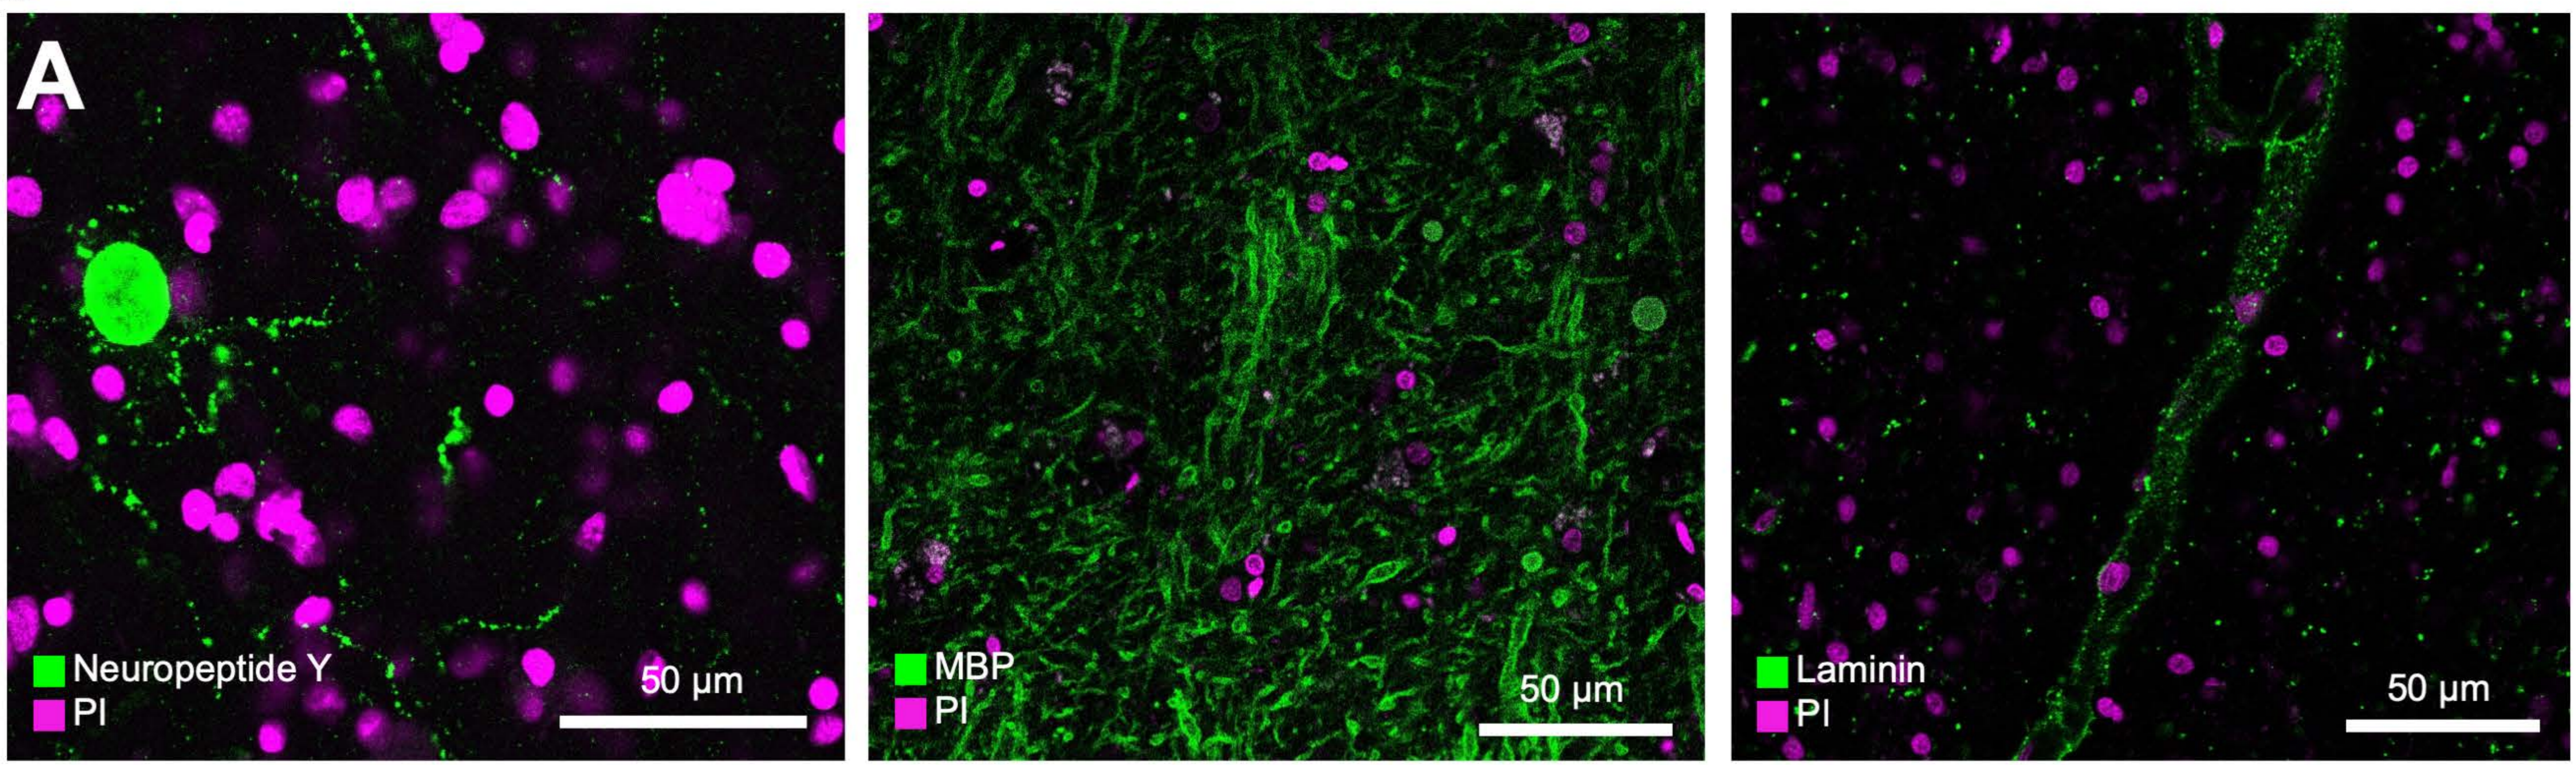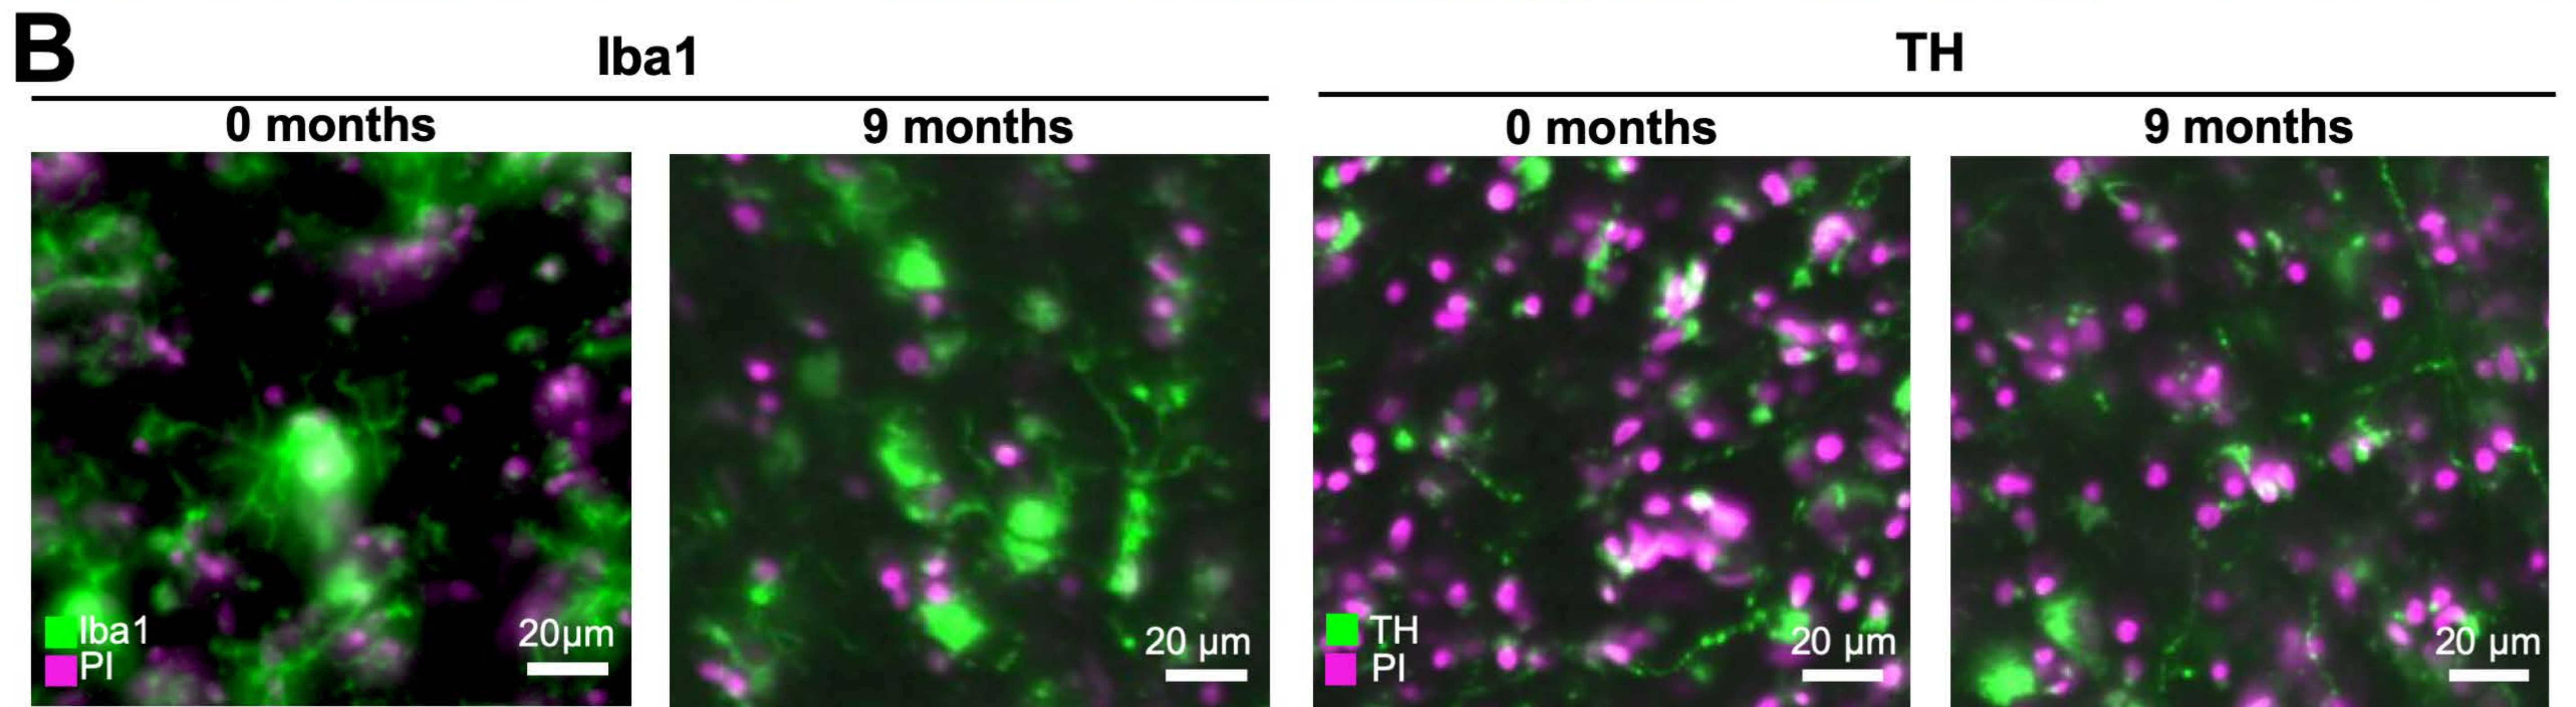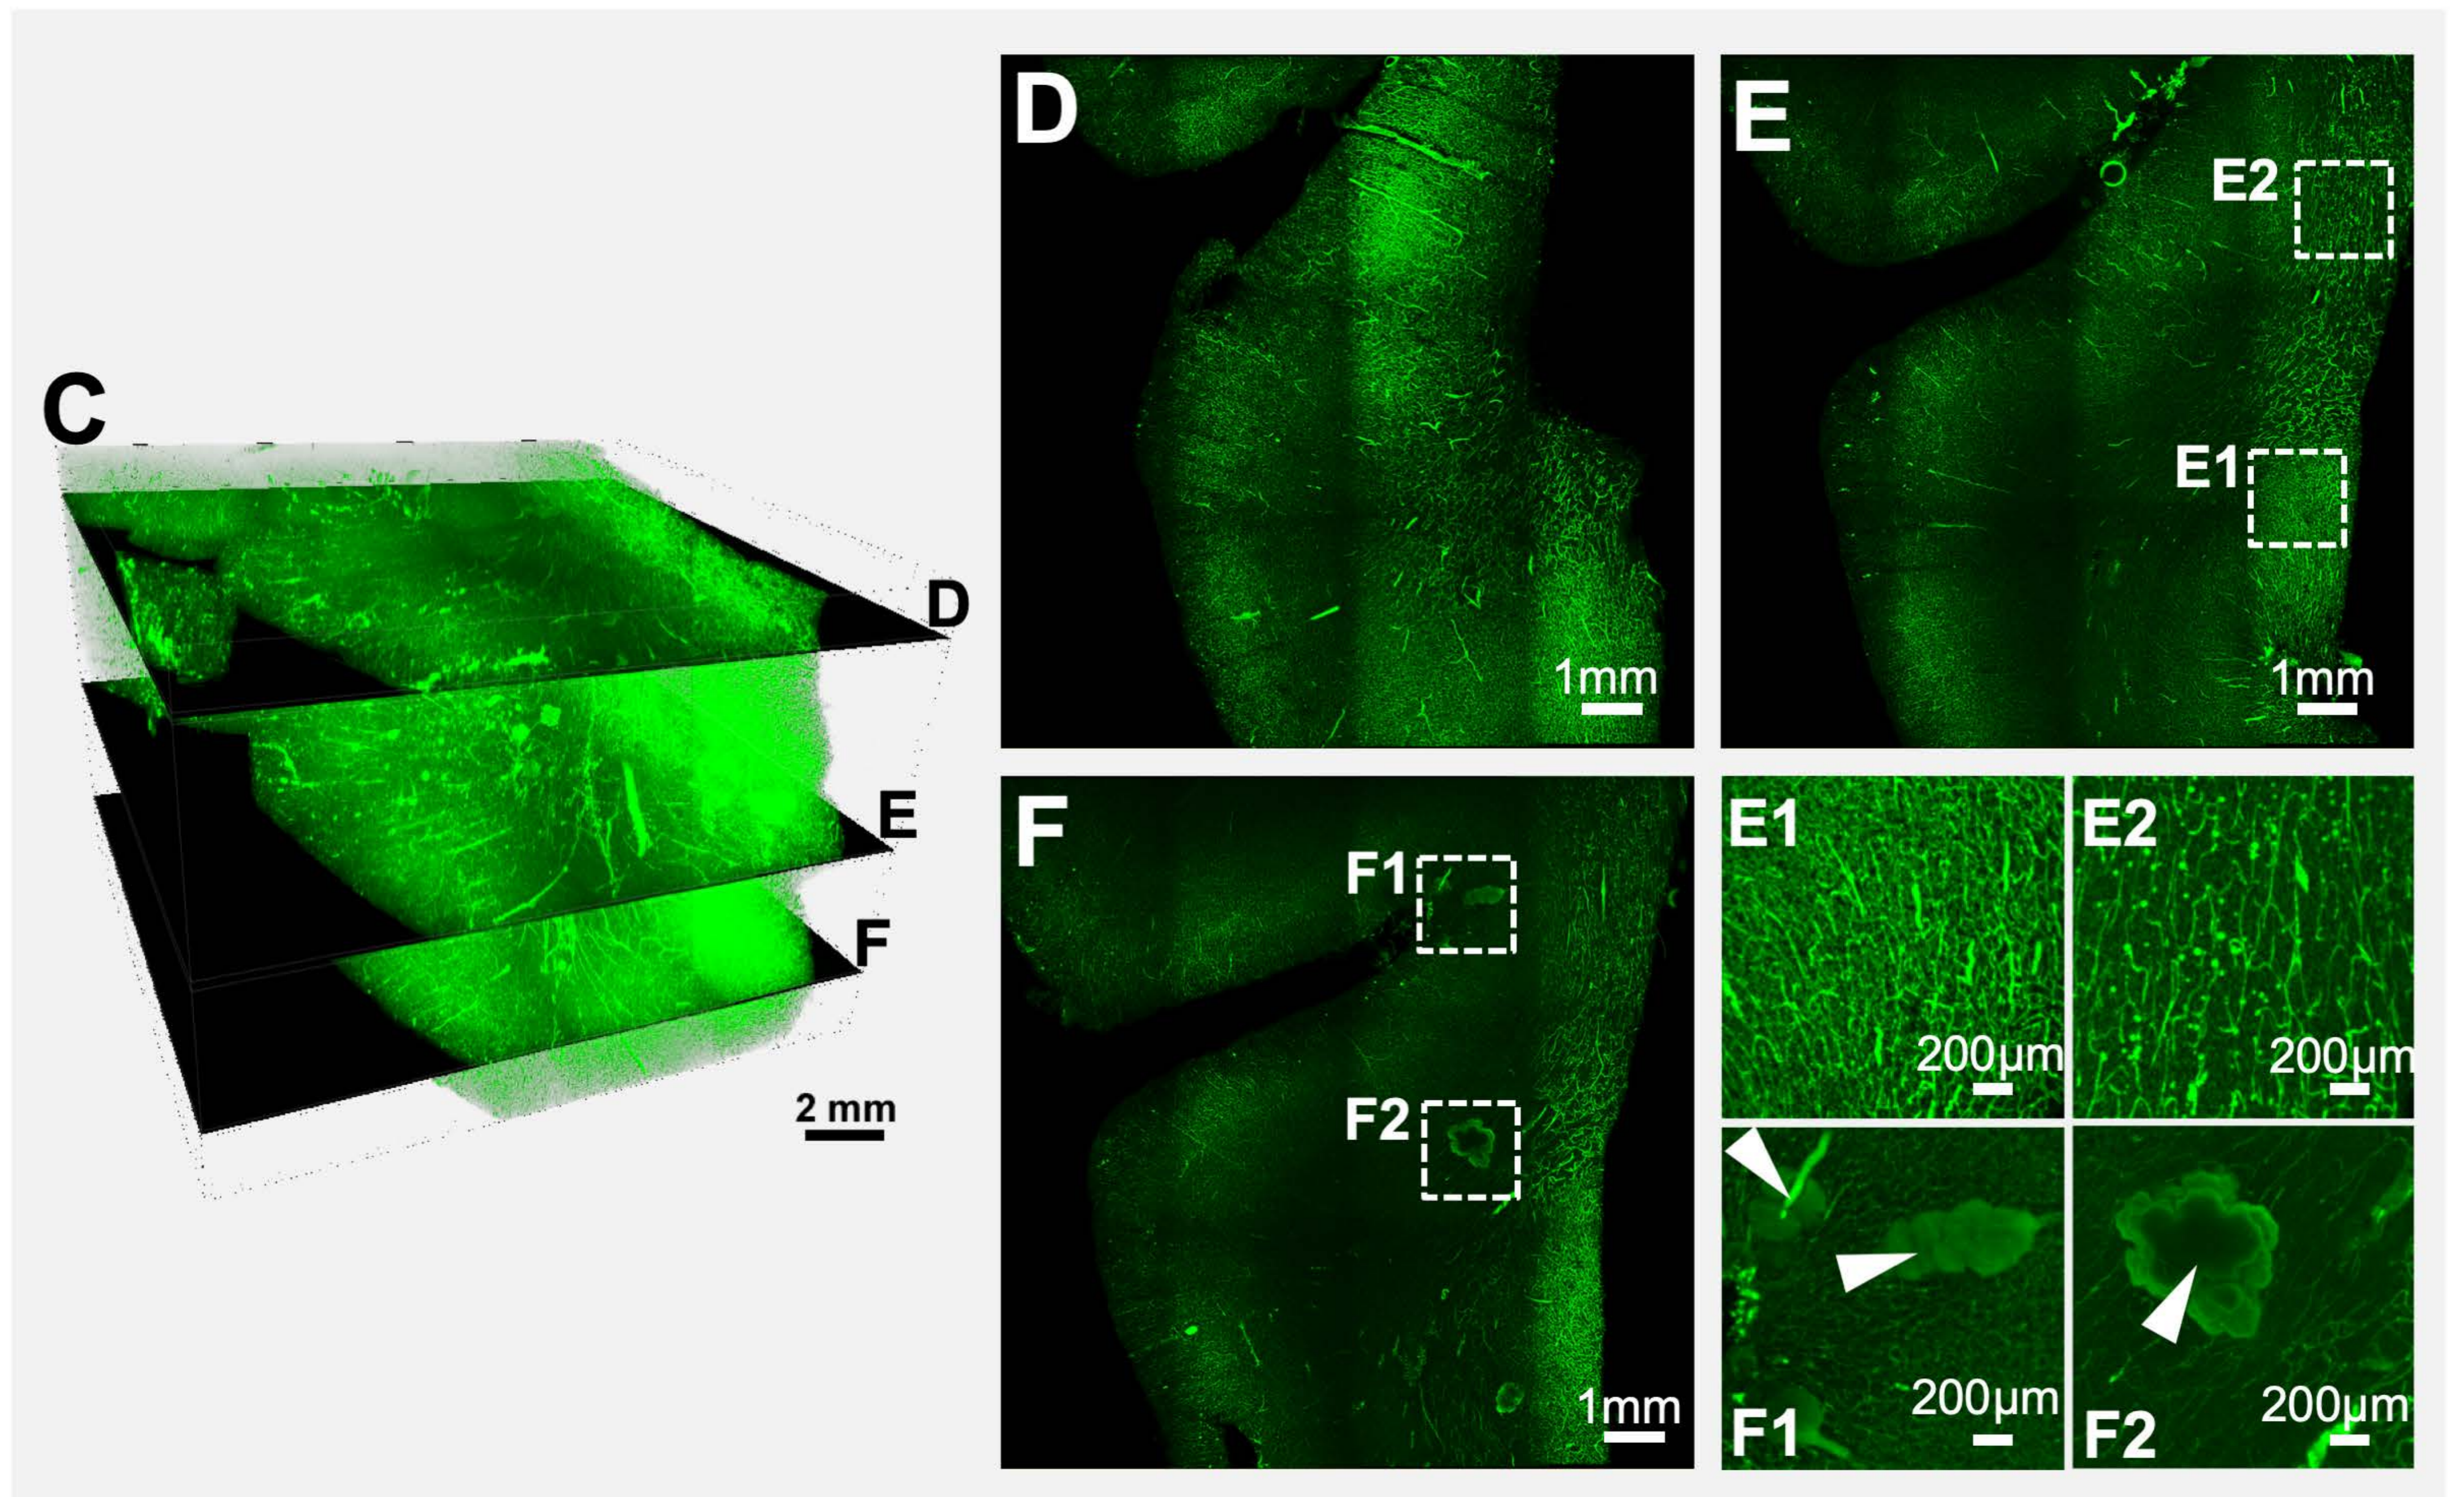

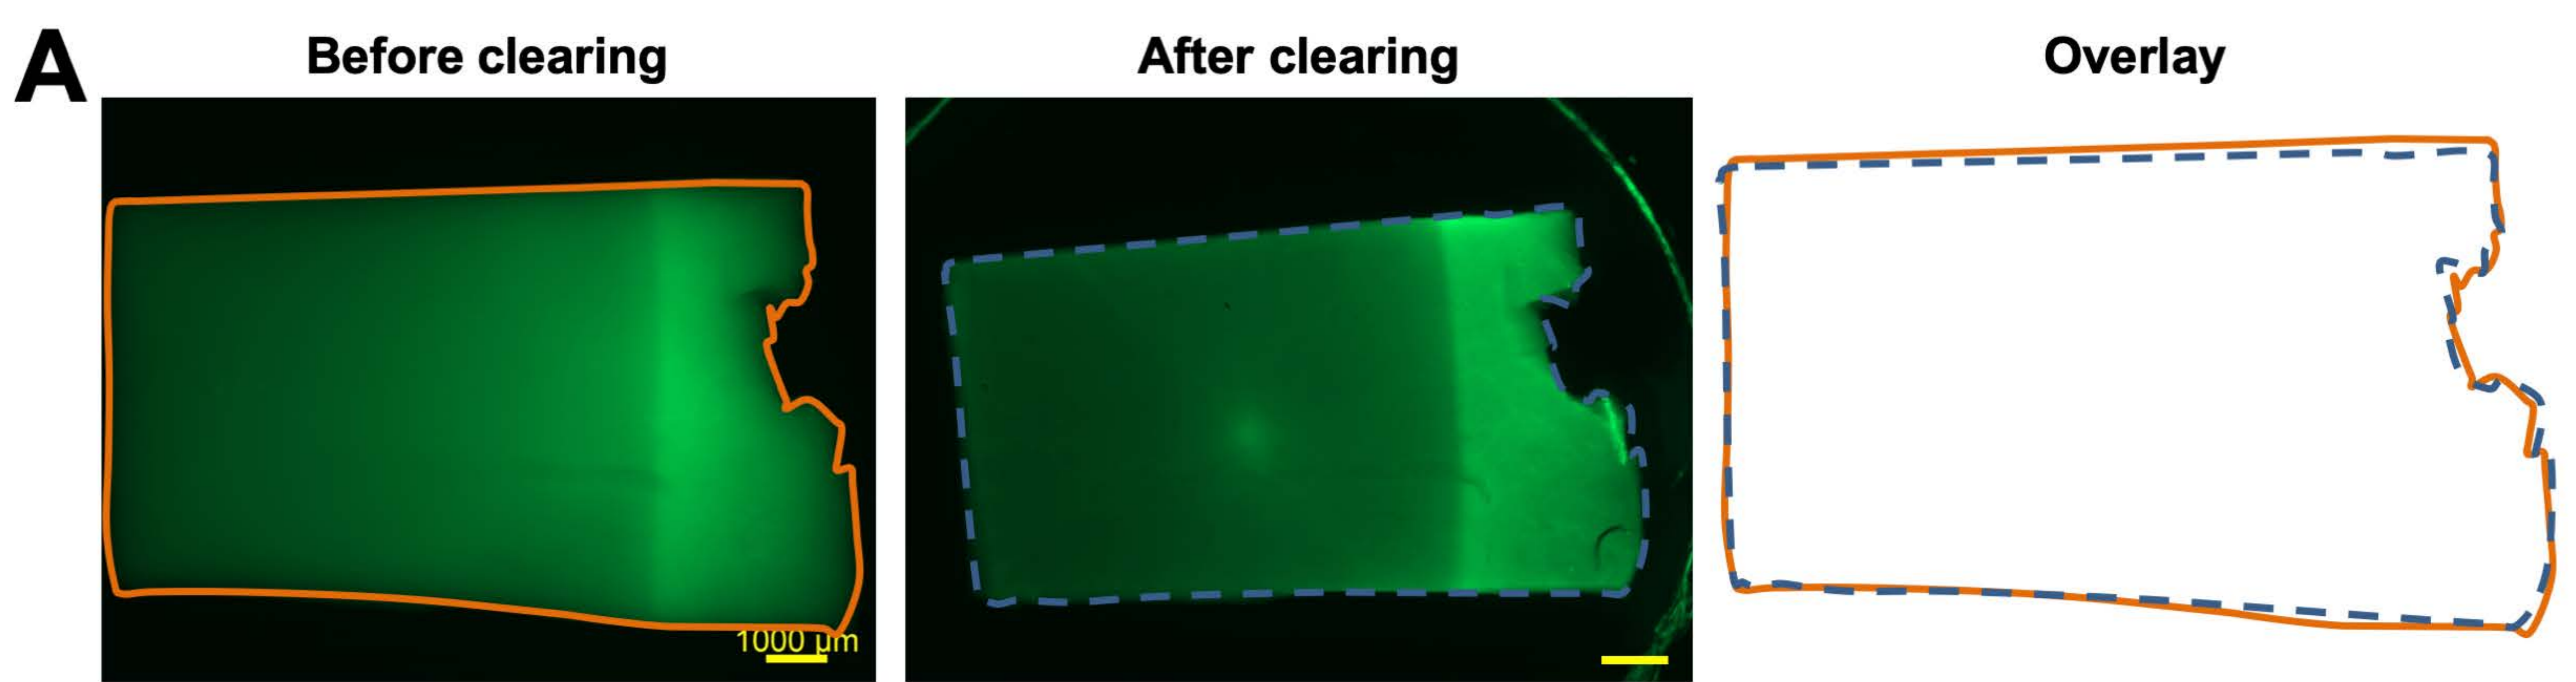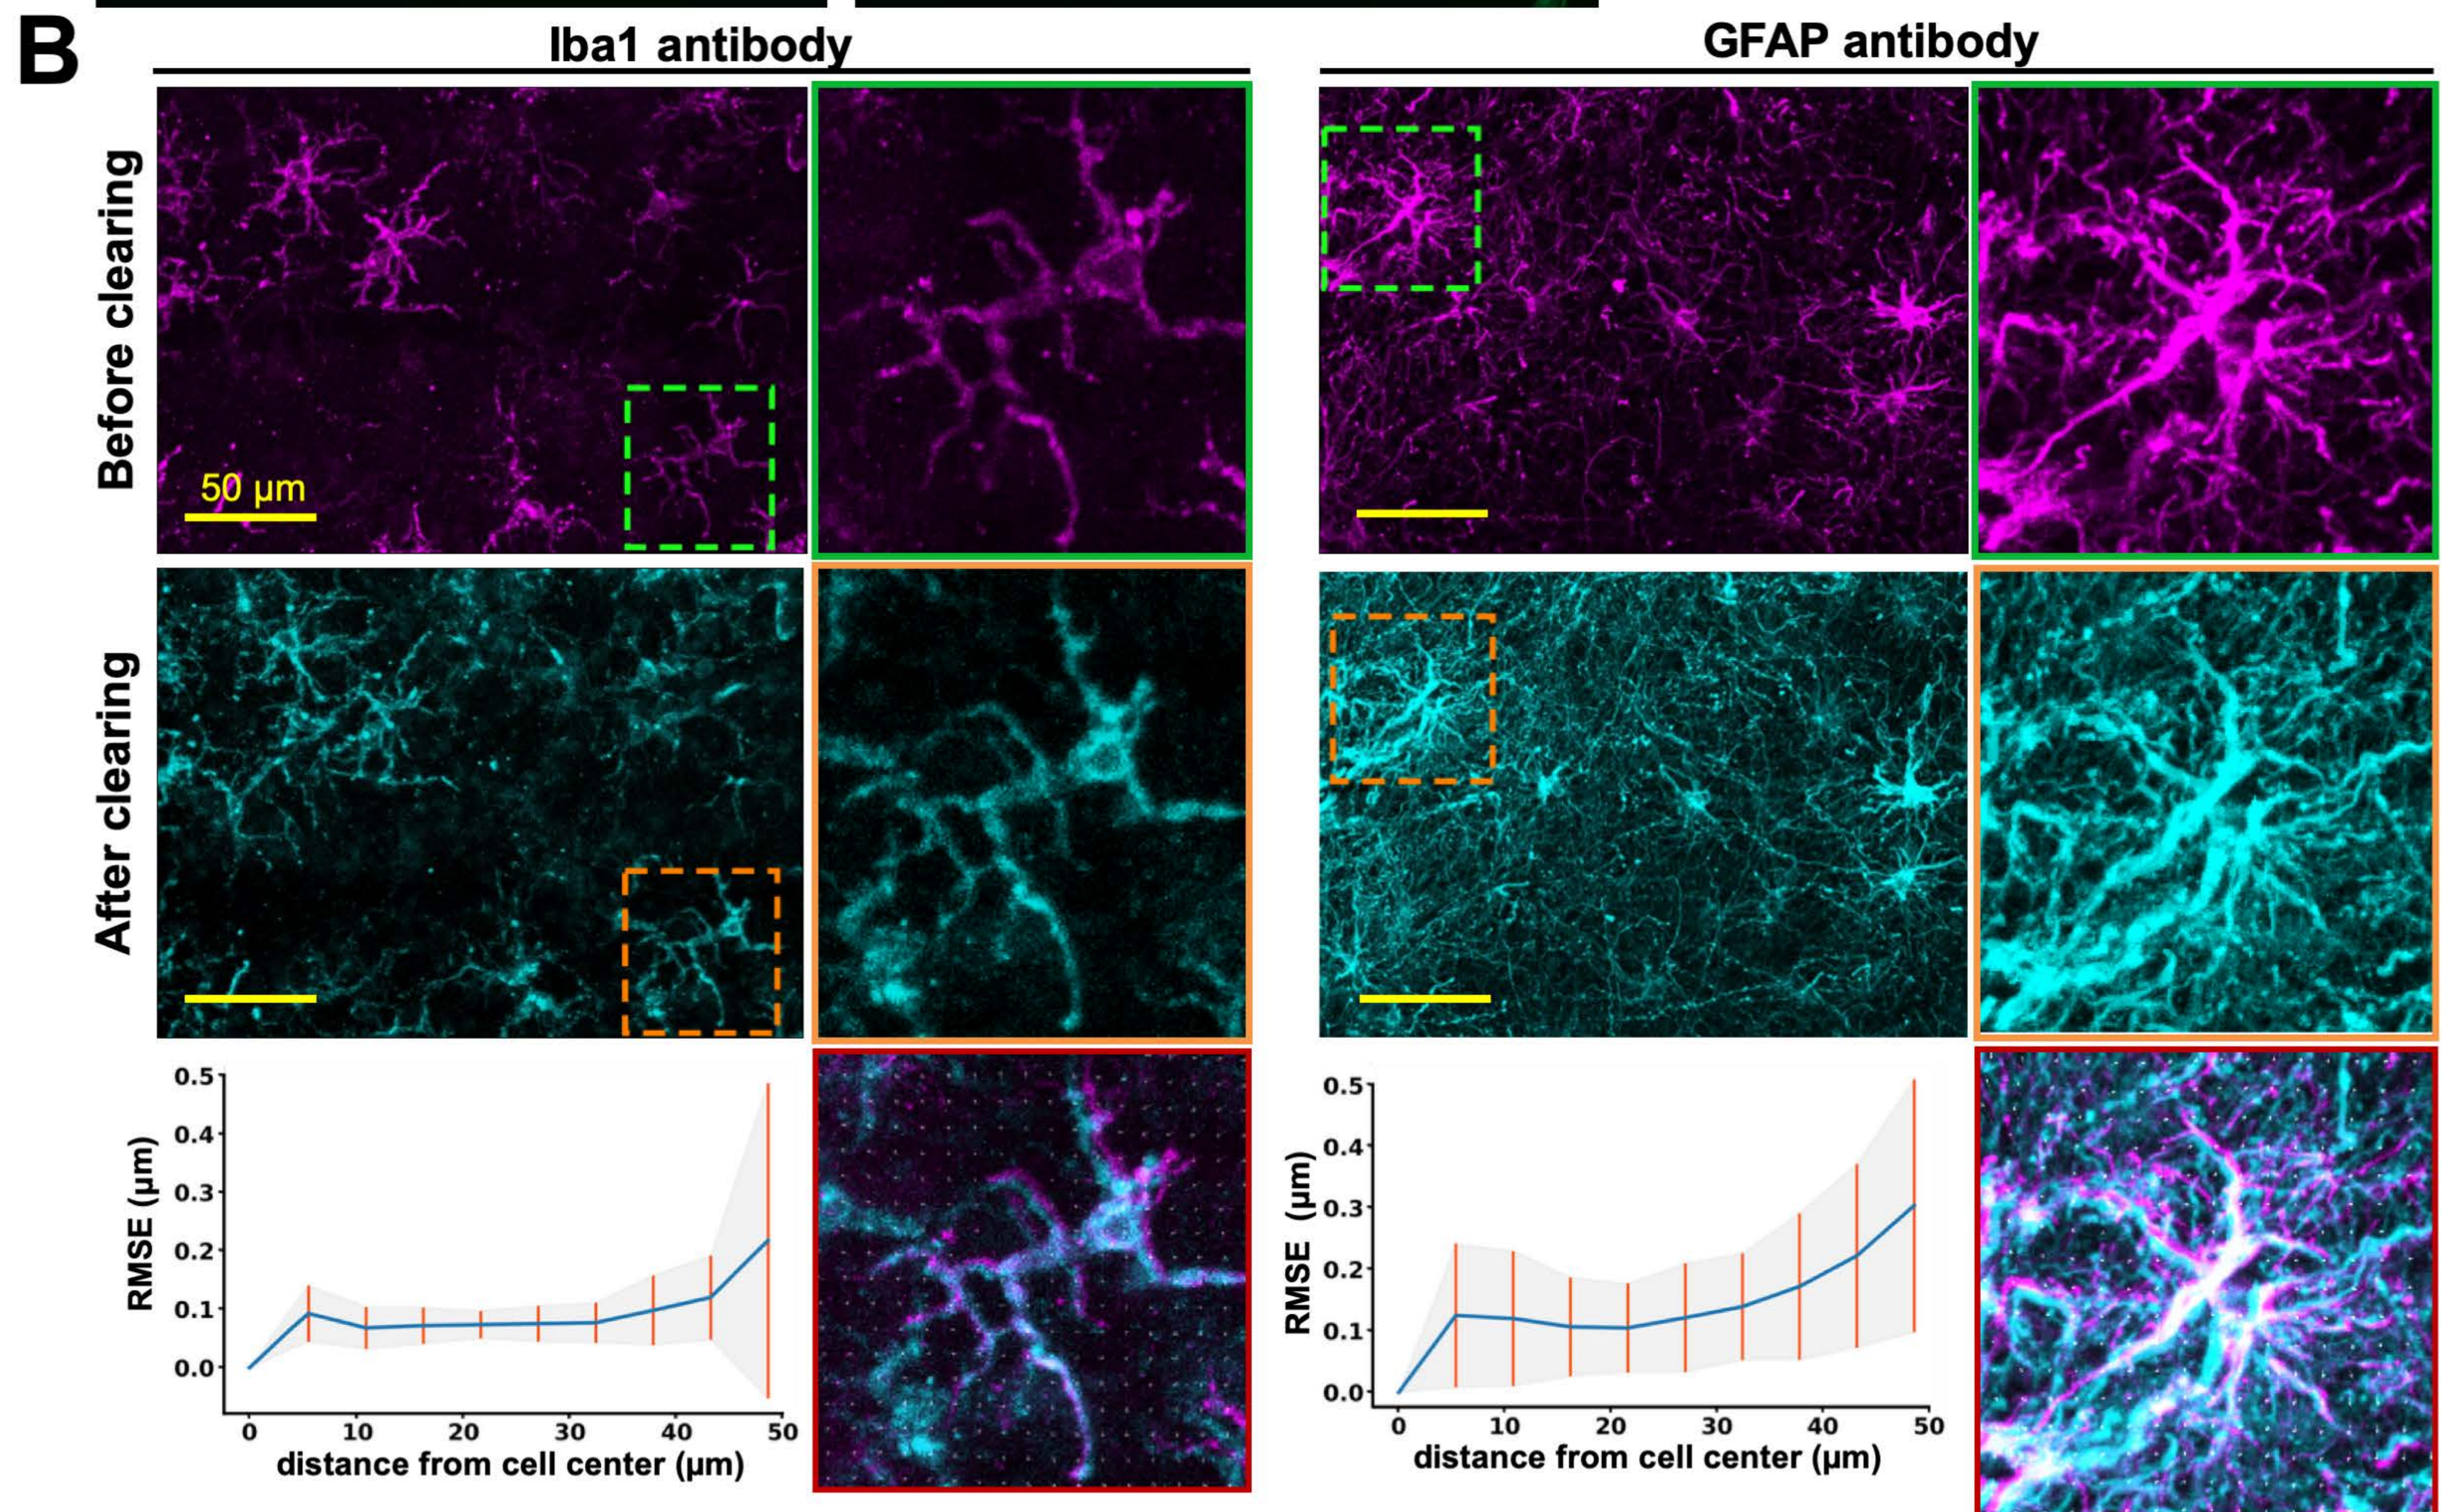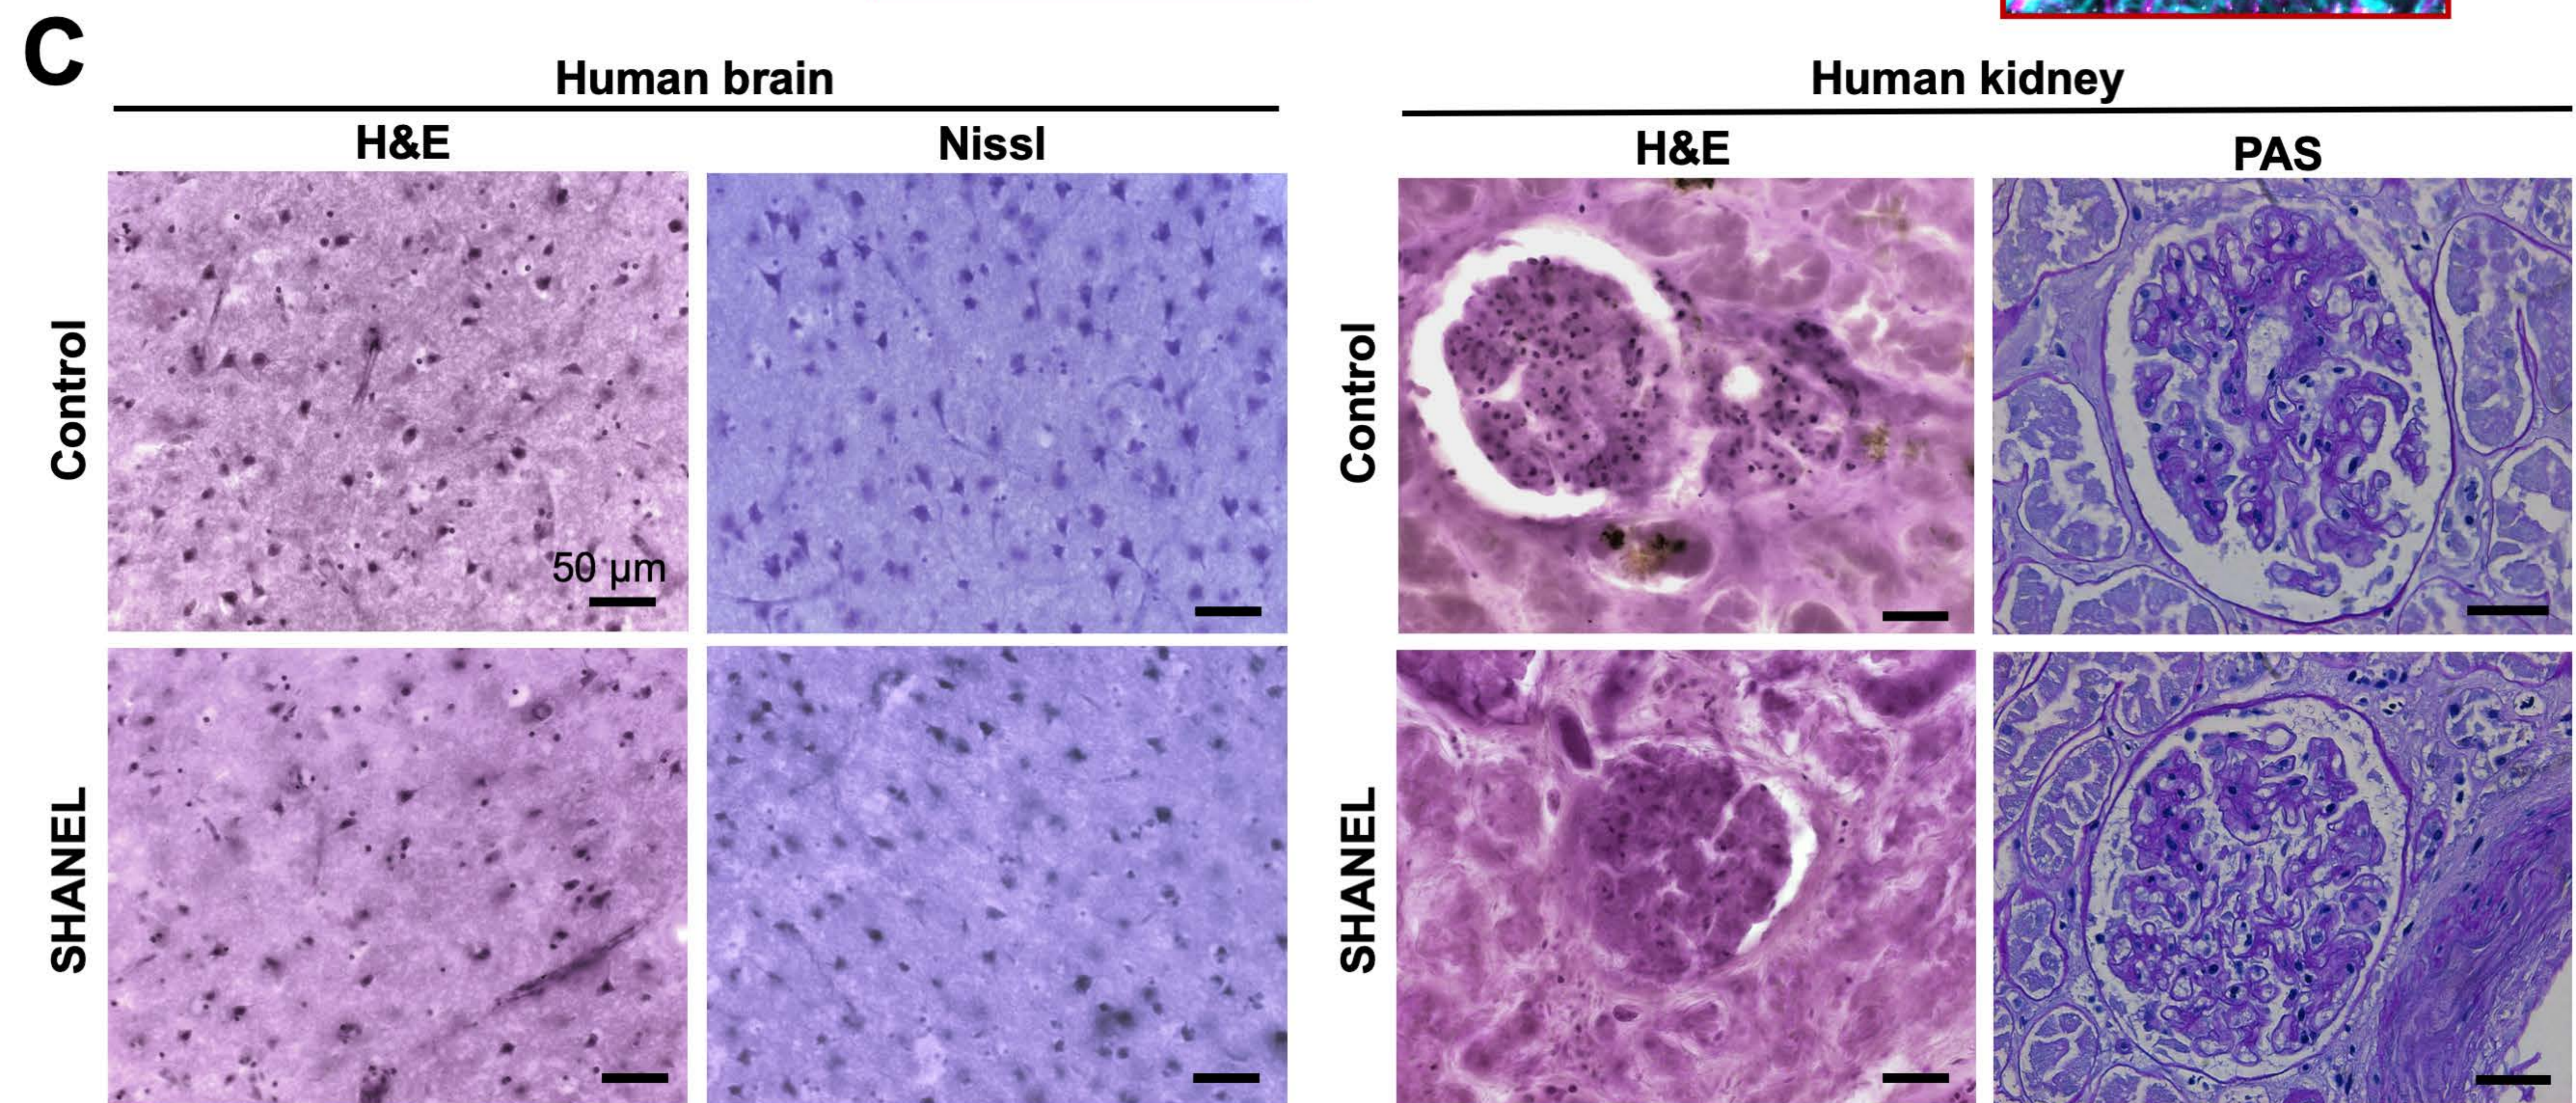

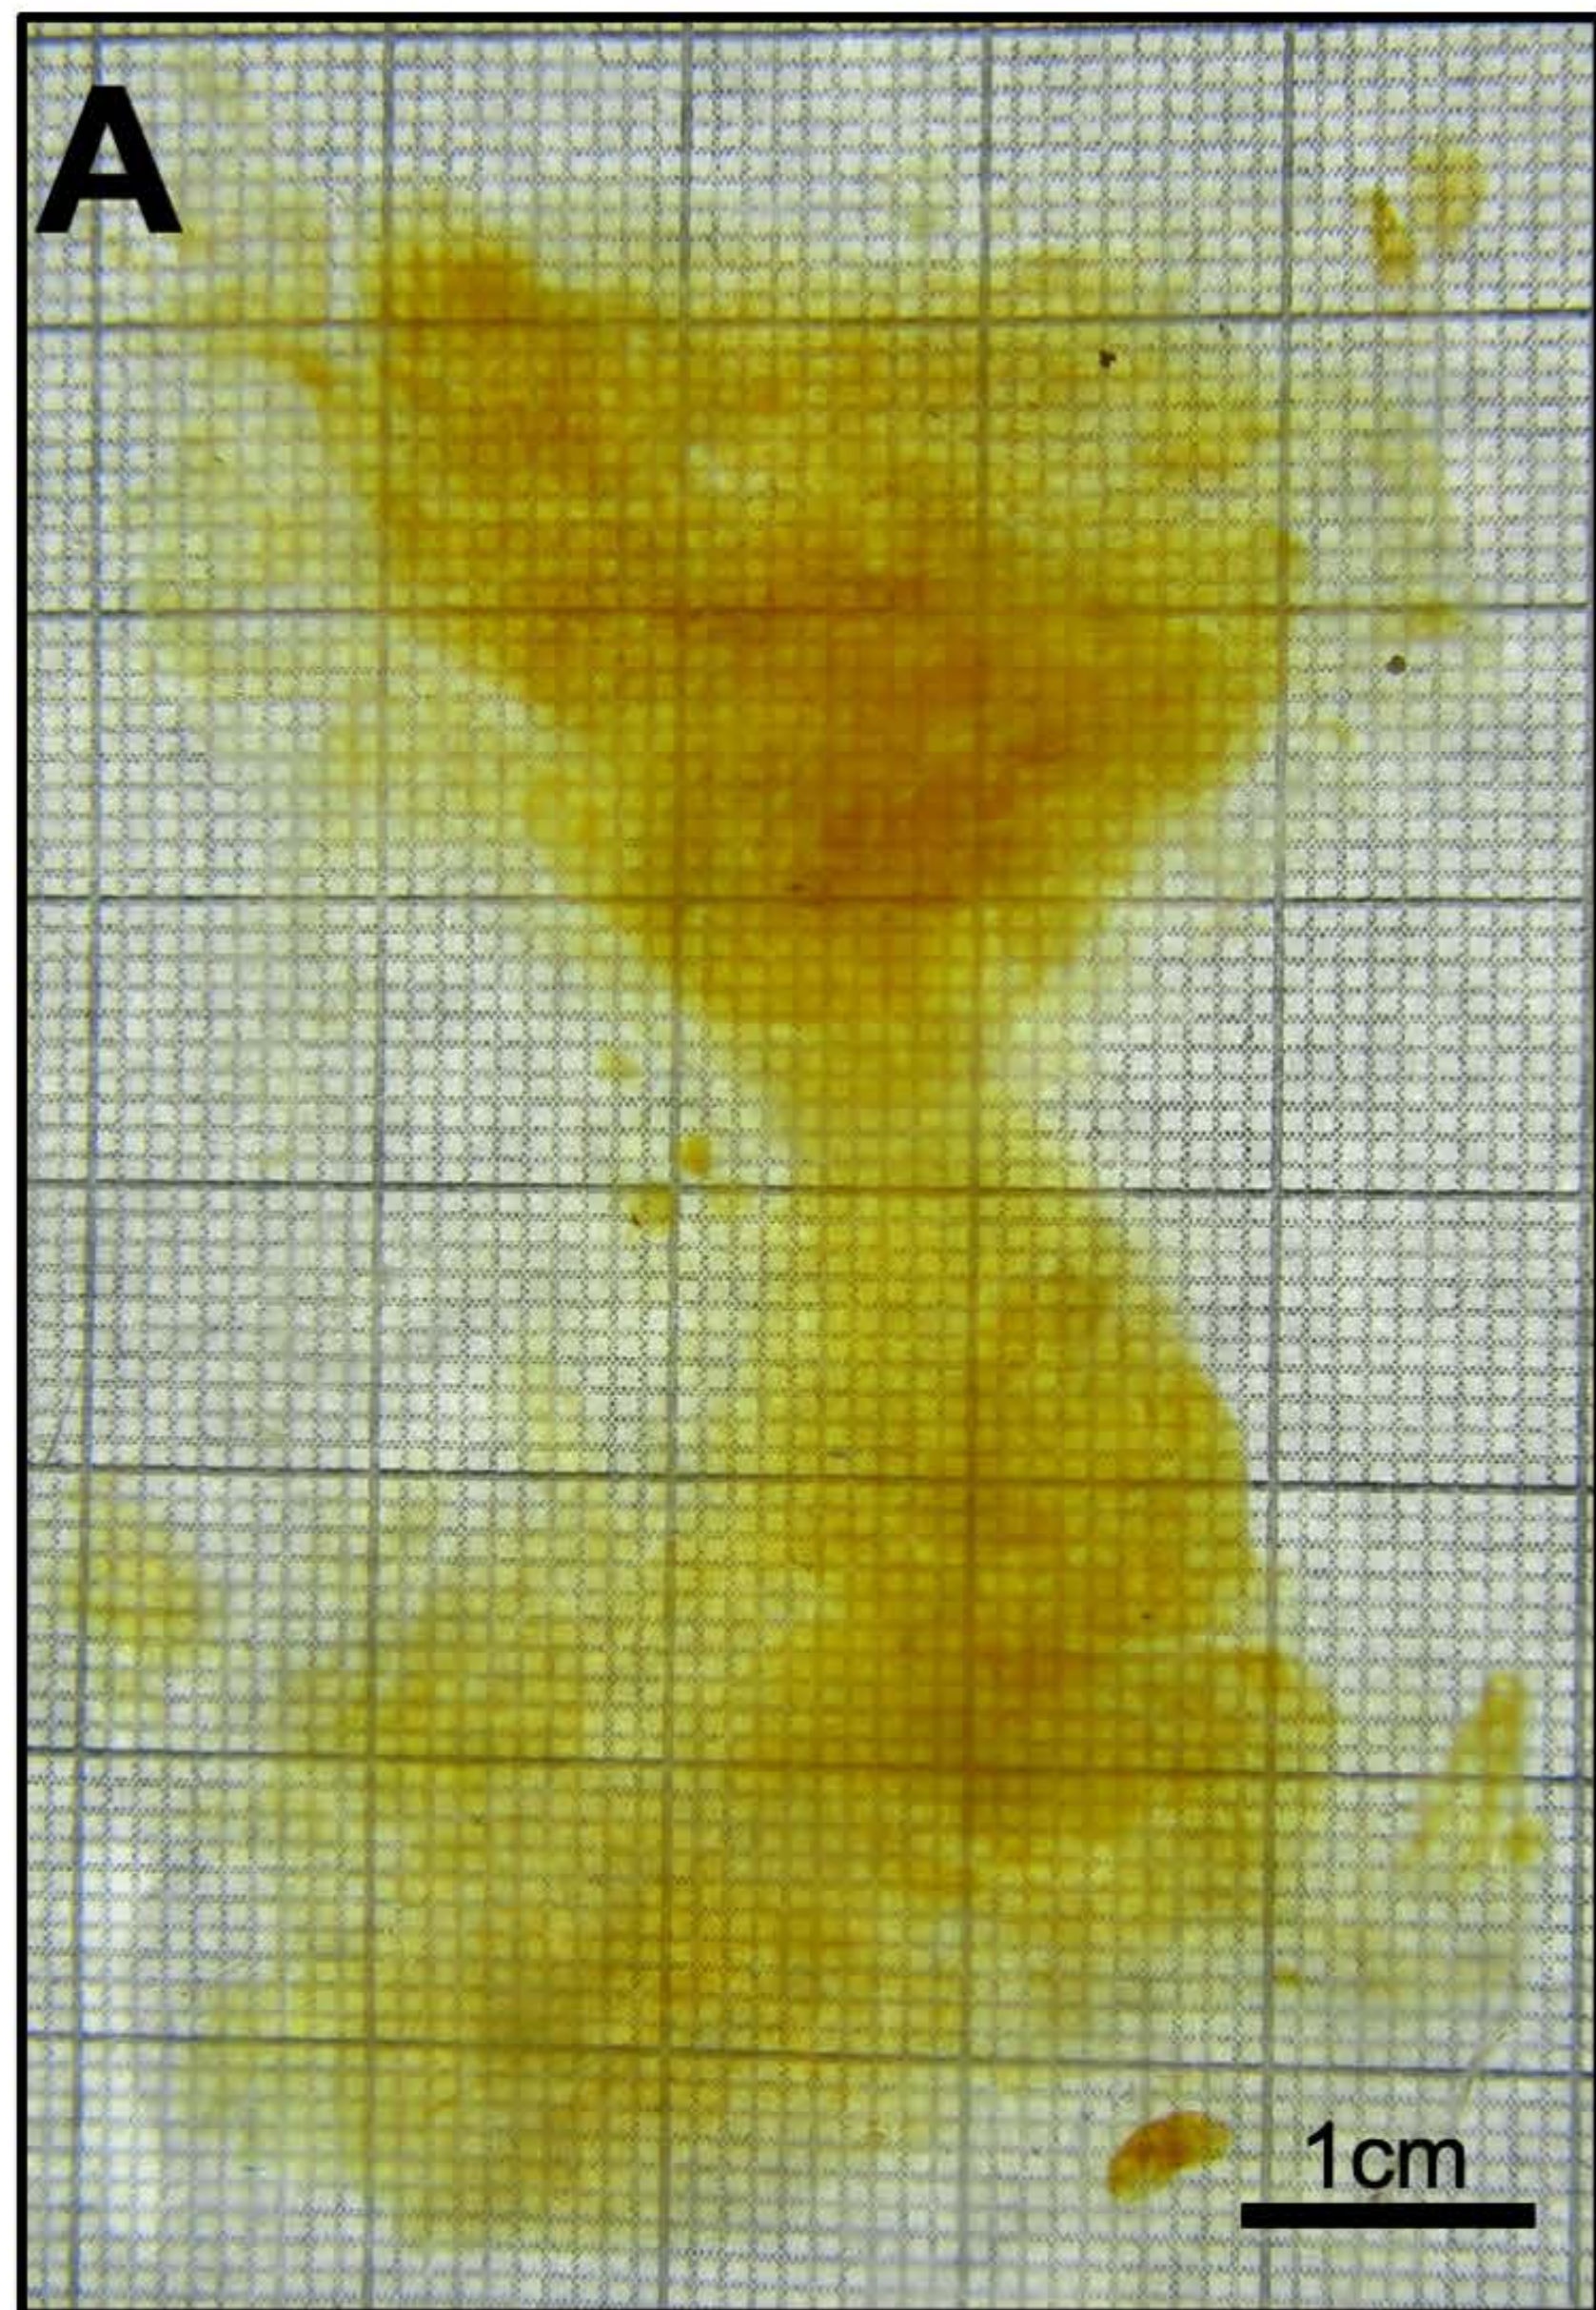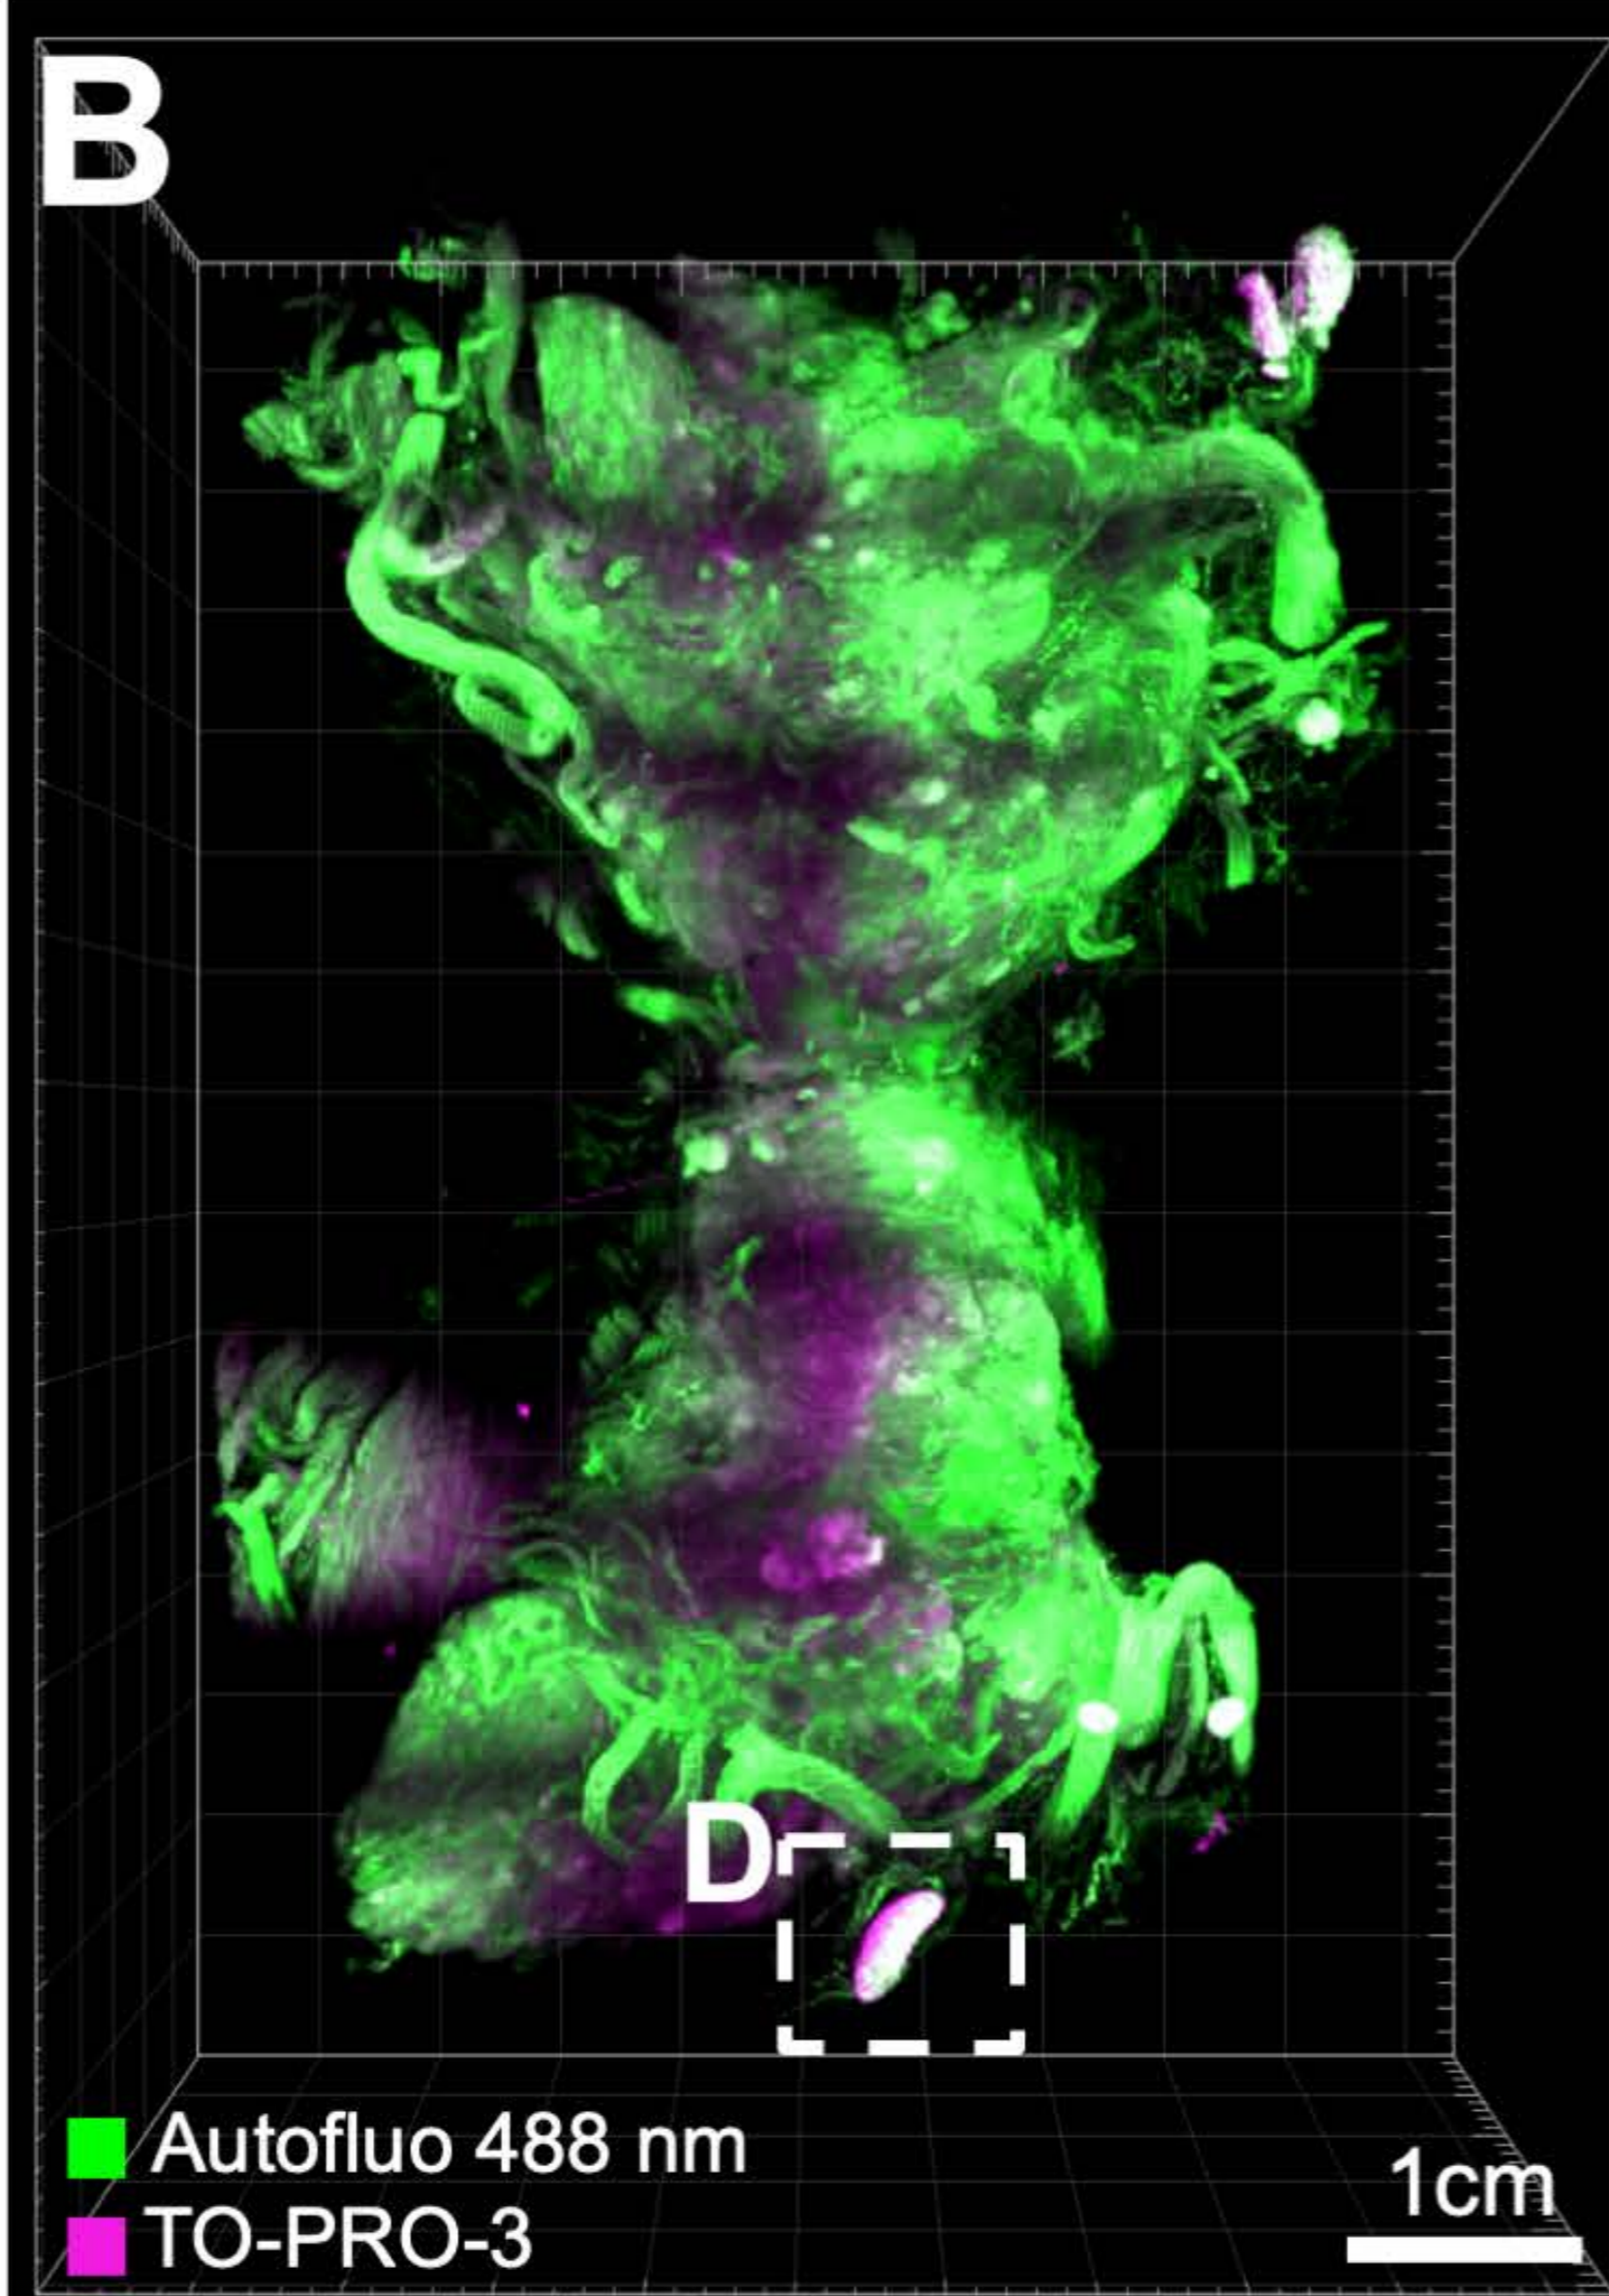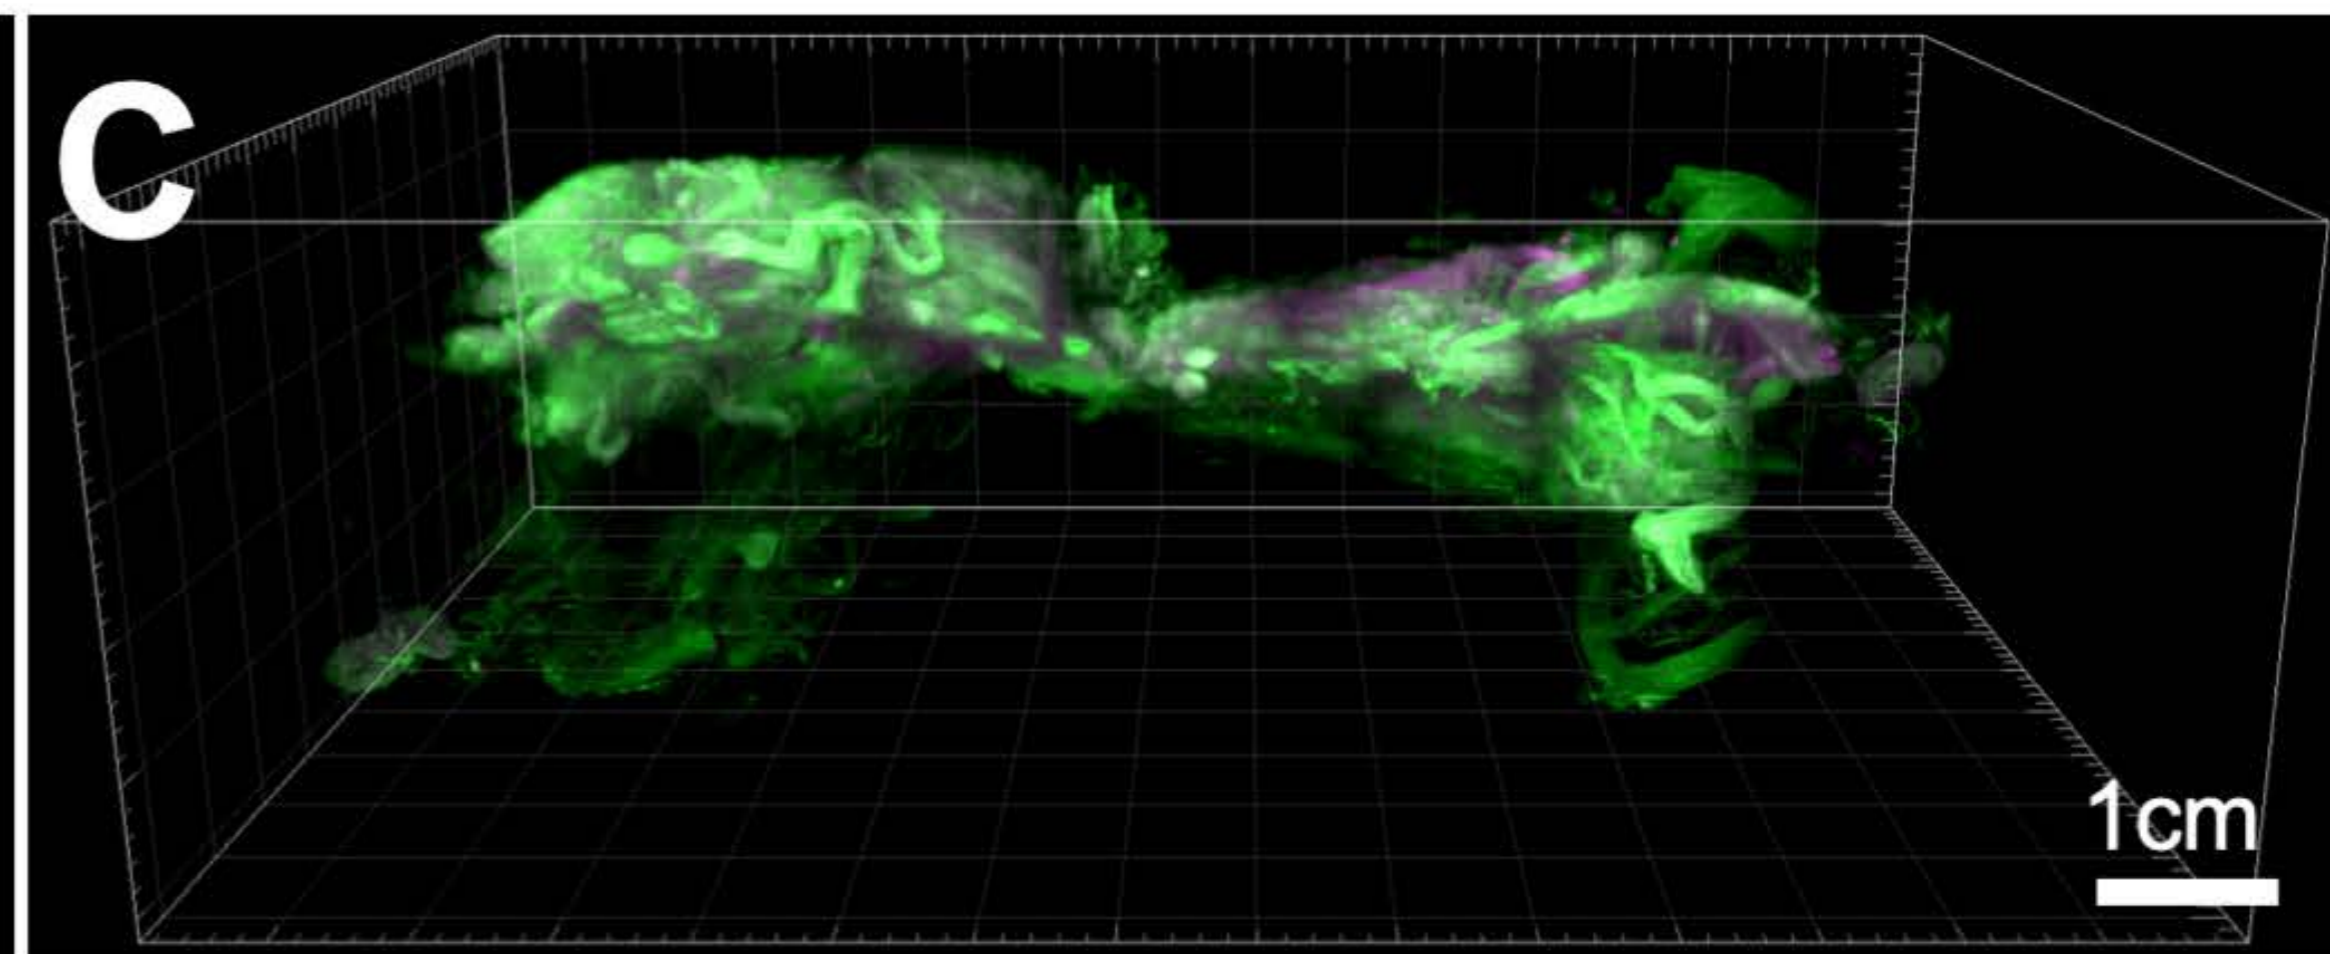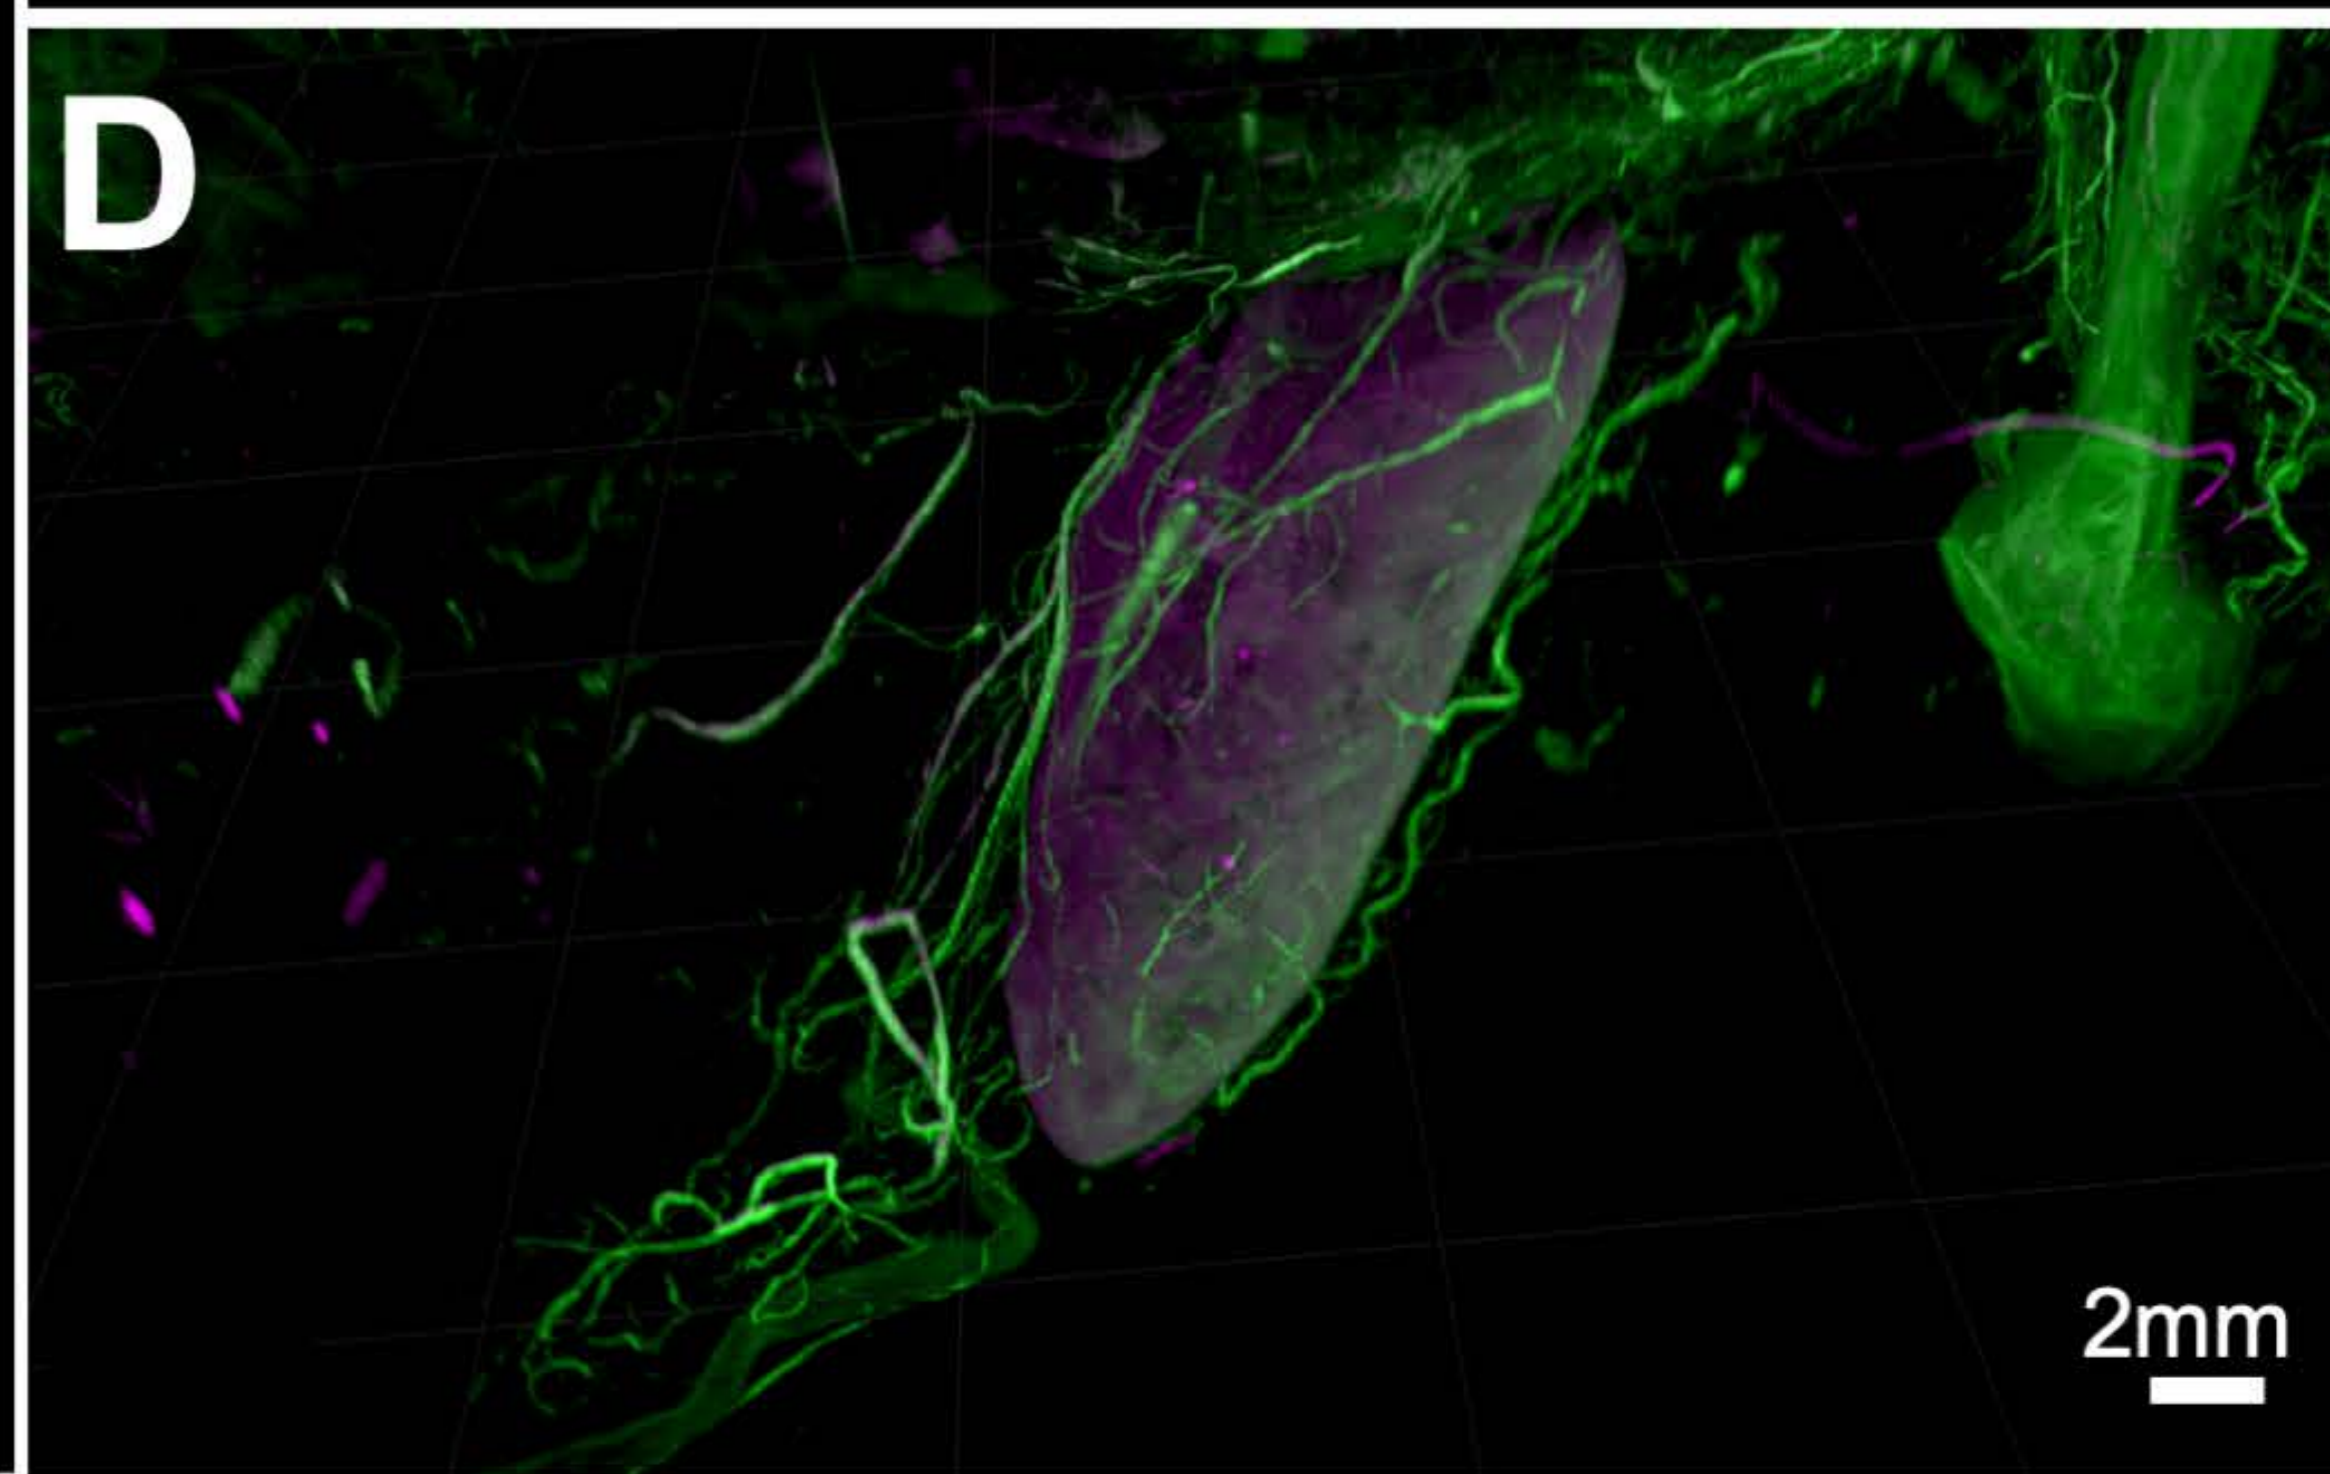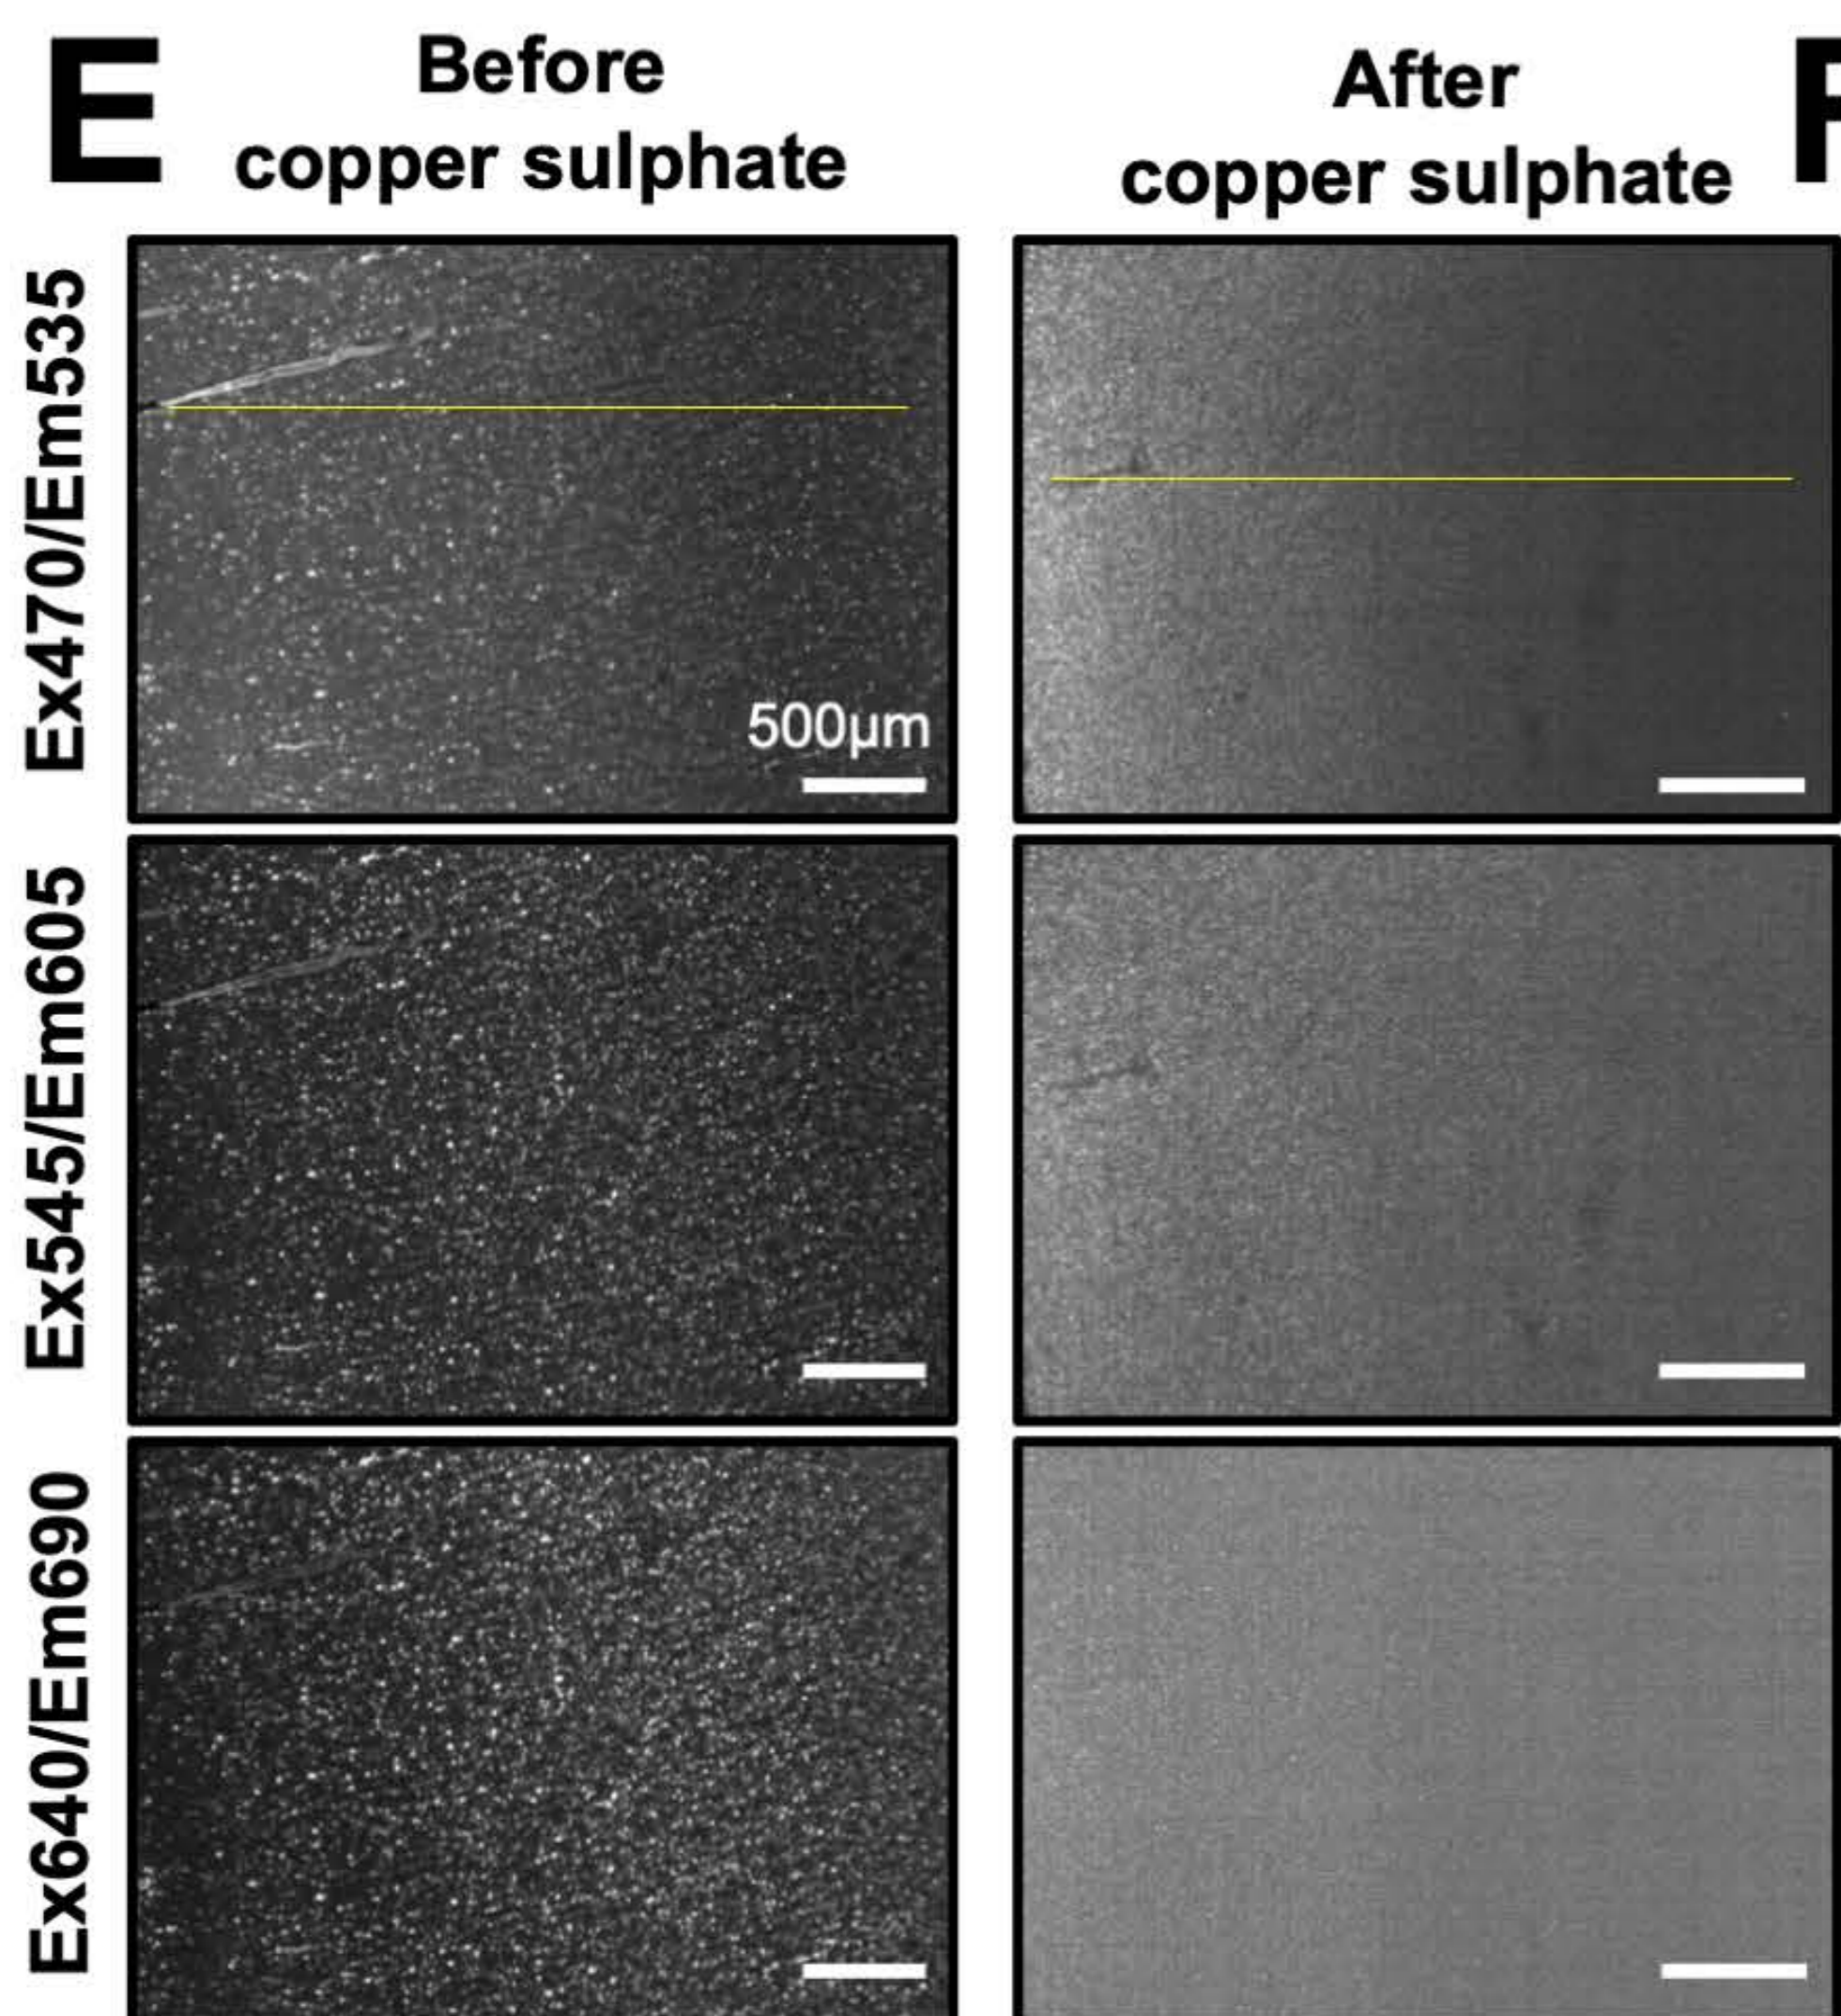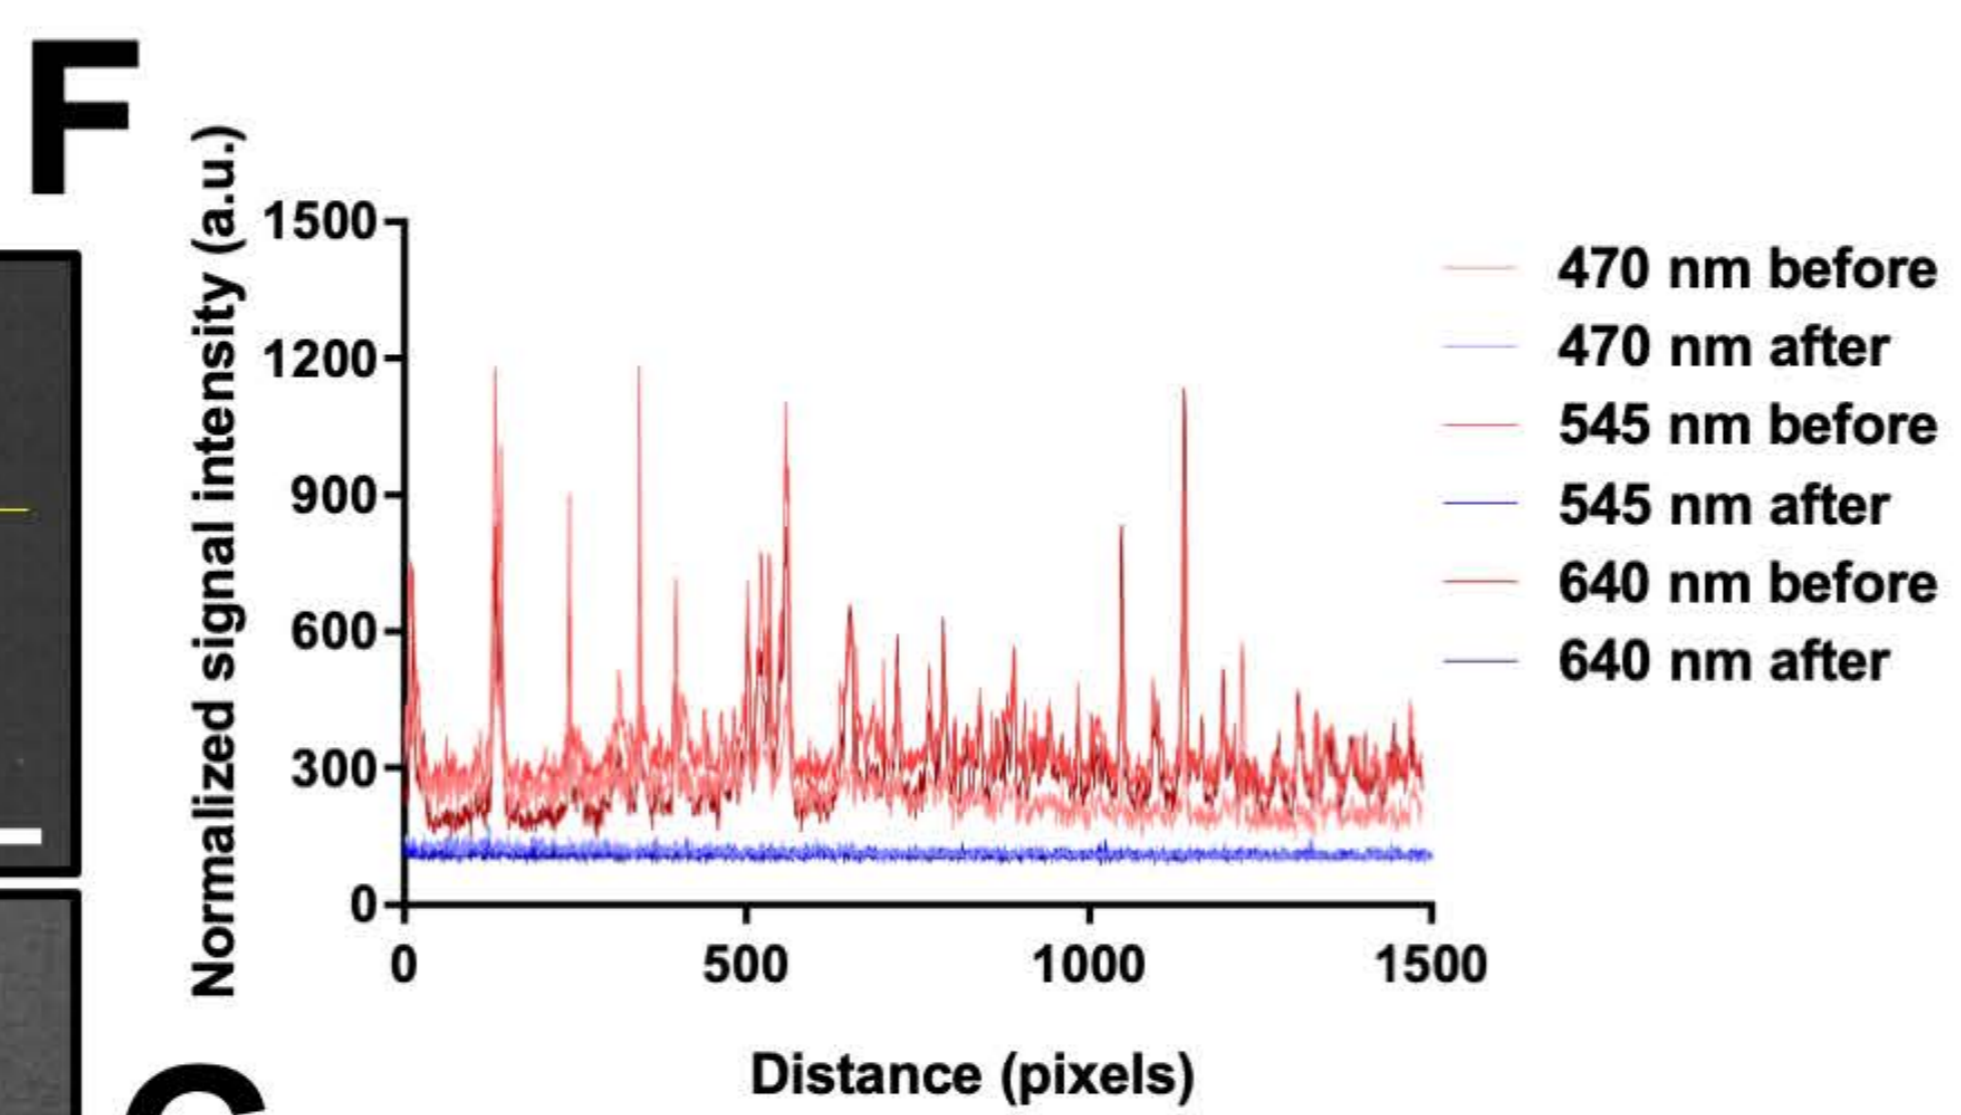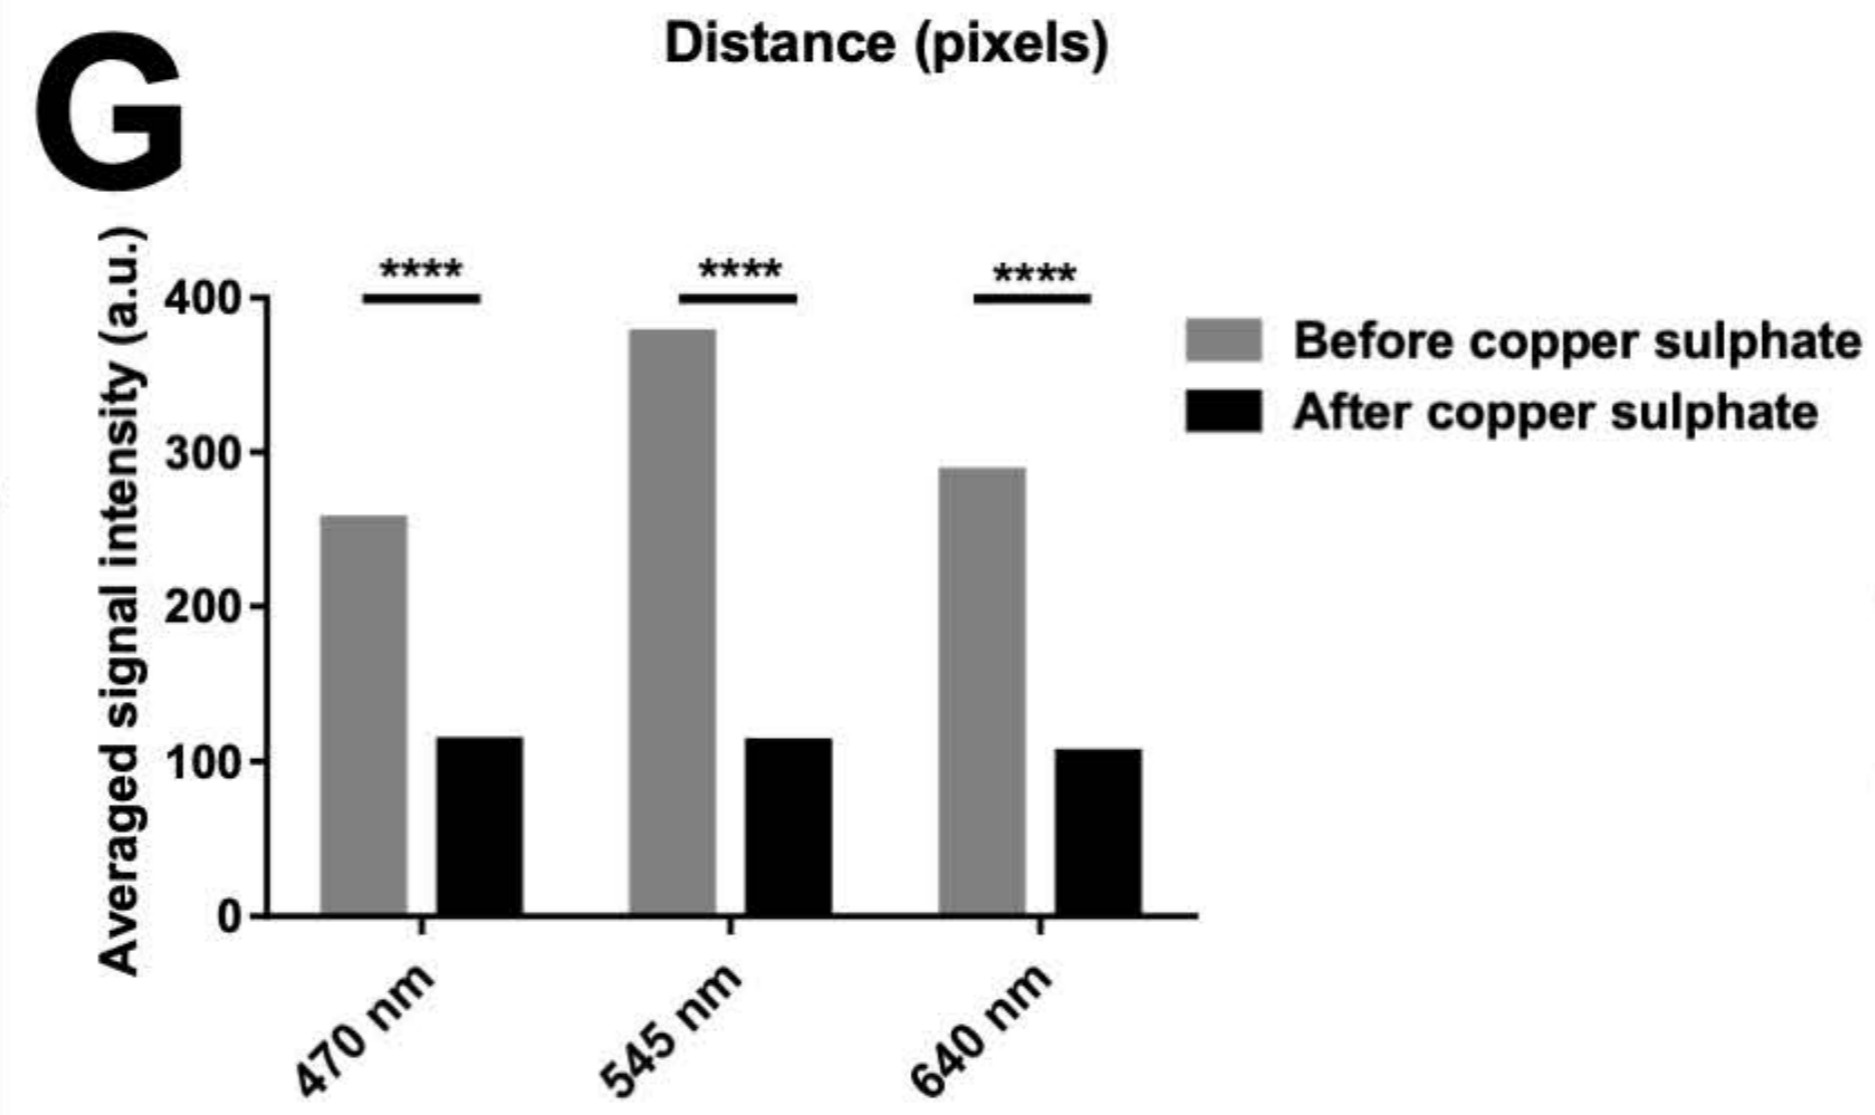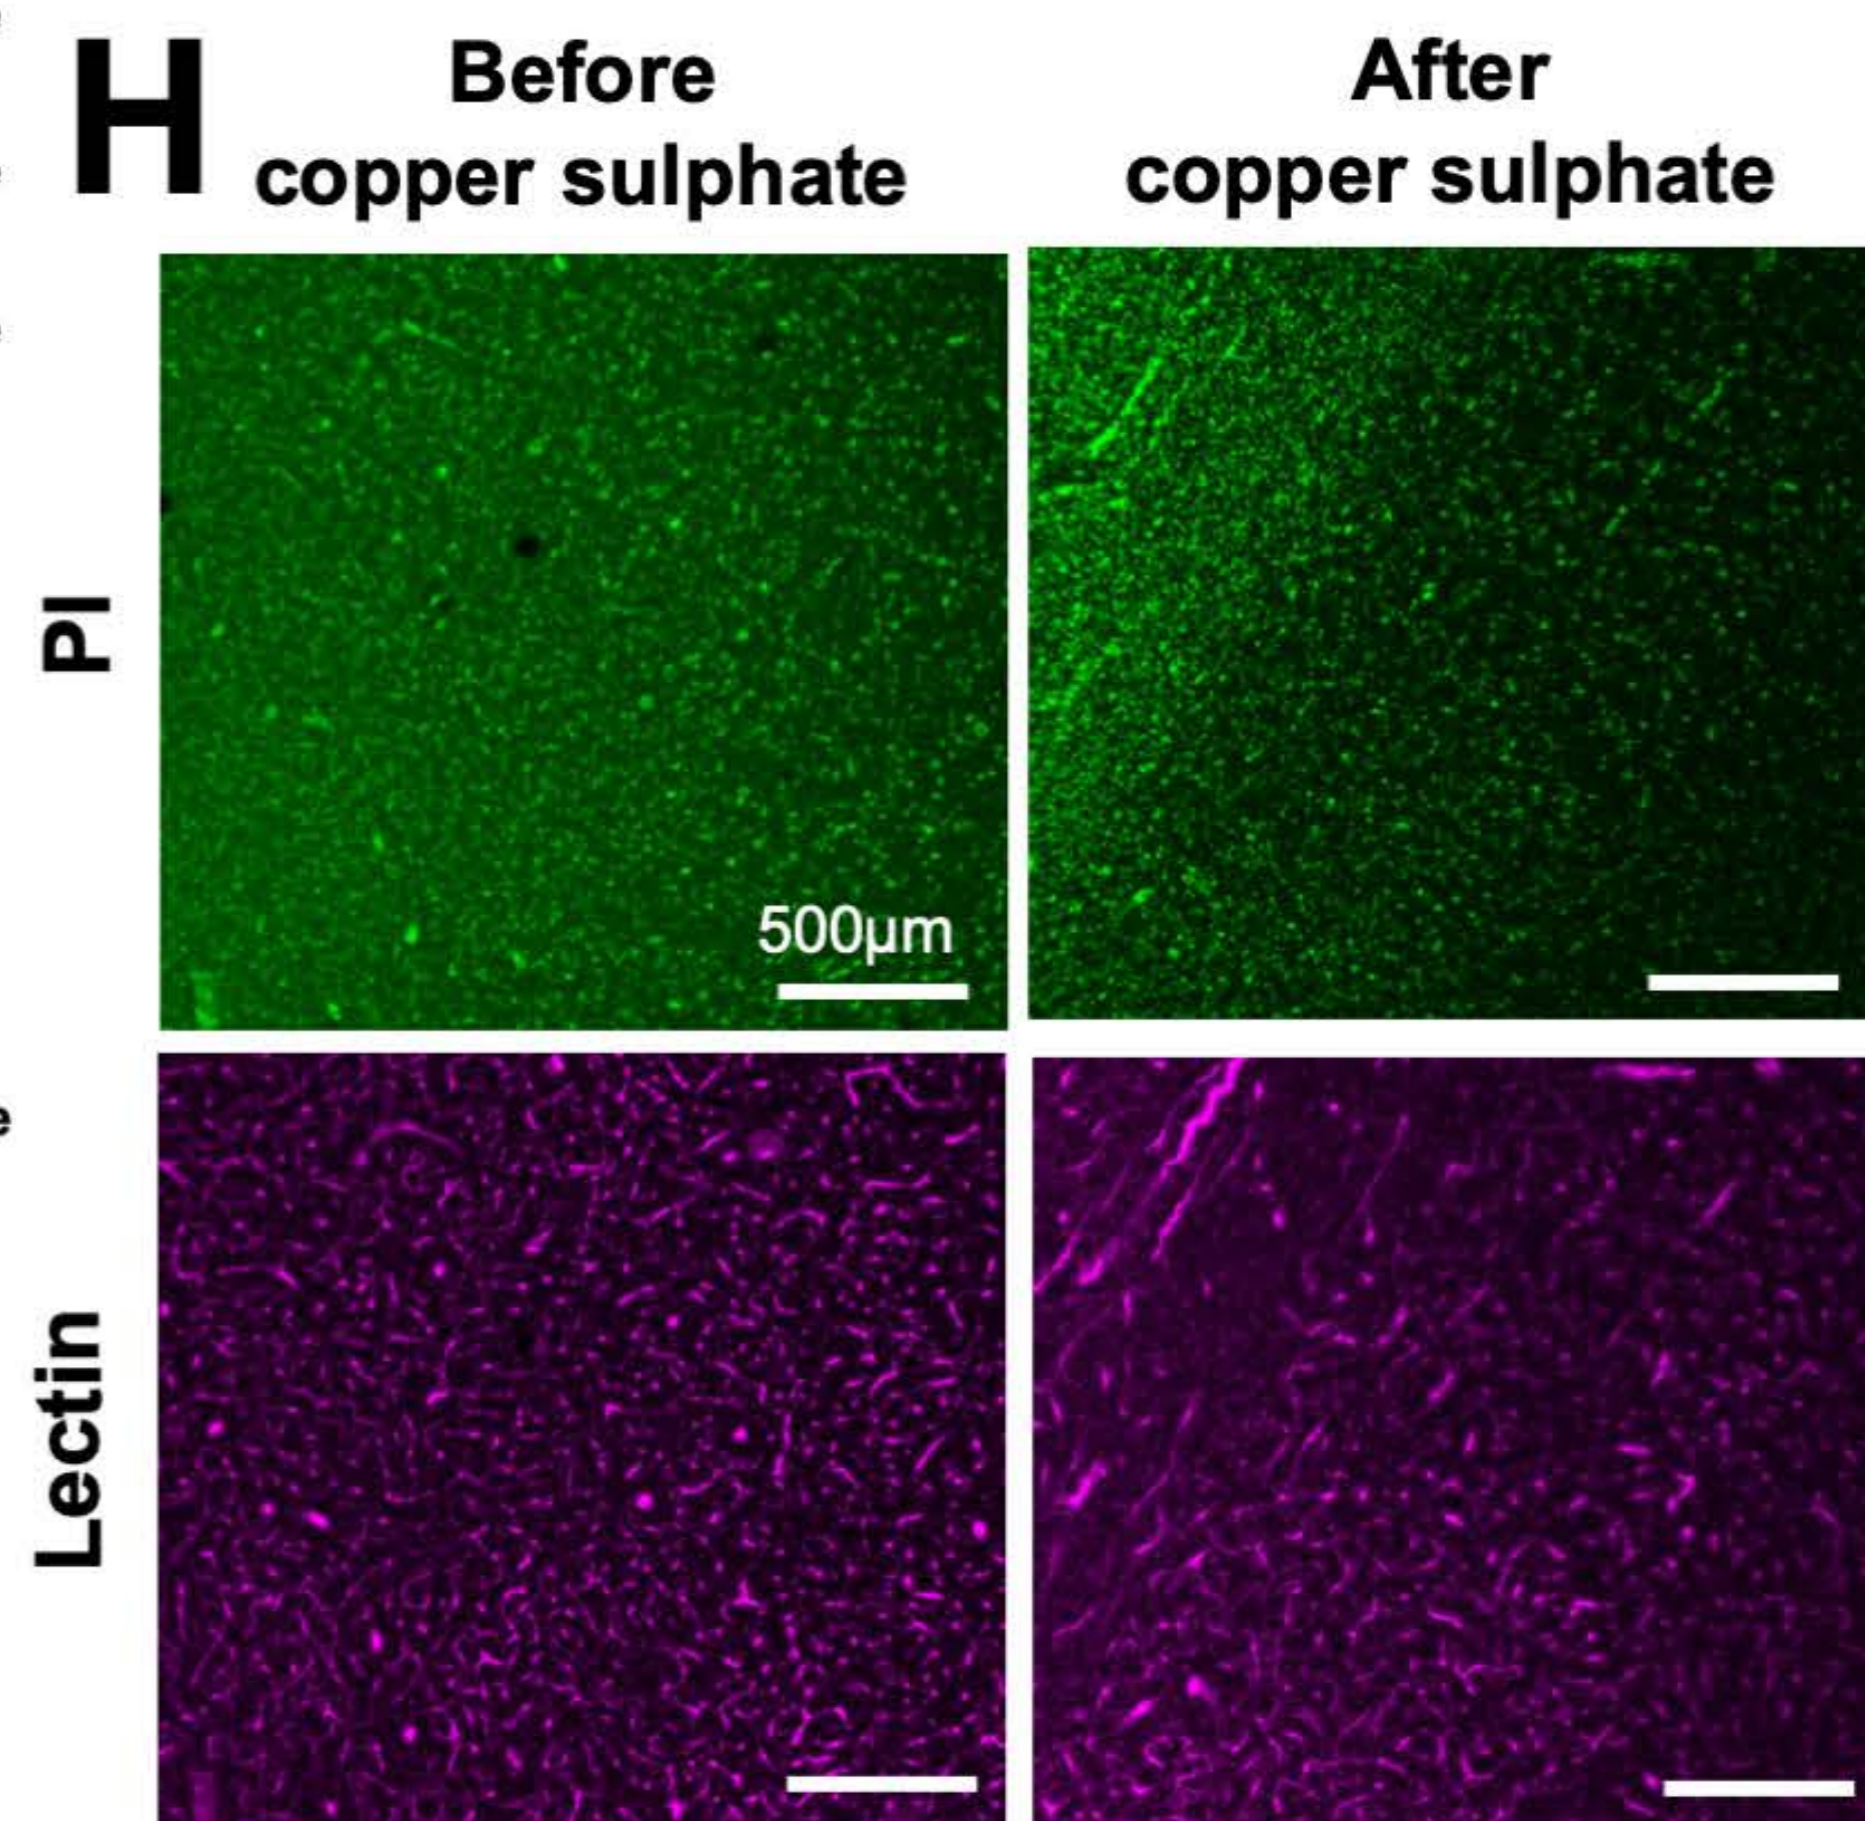

Supplement: NIHMS1628797-supplement-SupFigures_Zhao___Ert_rk__Cell__2020.pdf [file NIHMS1628797-supplement-SupFigures_Zhao___Ert_rk__Cell__2020.pdf]
